# Supplementary material
Source: PubMed Central journal article supplement (PMC6660988)
Supplement: NIHMS1032805-supplement-Supp_TableS1-12.pdf [file NIHMS1032805-supplement-Supp_TableS1-12.pdf]

## Supplemental Tables

### Host genetic determinants of the gut microbiota of wild mice

Taichi A. Suzuki<sup>1\*</sup>, Megan Phifer-Rixey<sup>2</sup>, Katya L. Mack<sup>1</sup>, Michael J. Sheehan<sup>3</sup>, Dana Lin<sup>1</sup>, Ke Bi<sup>4</sup>, and Michael W. Nachman<sup>1</sup>

<sup>1</sup> *Department of Integrative Biology and Museum of Vertebrate Zoology, University of California Berkeley, Berkeley, CA, 94720, USA.*

<sup>2</sup> *Department of Biology, Monmouth University, West Long Branch, NJ, 07764, USA.*

<sup>3</sup> *Department of Neurobiology and Behavior, Cornell University, Ithaca, NY, 14853, USA.*

<sup>4</sup> *California Institute for Quantitative Biosciences, University of California Berkeley, Berkeley, CA, 94720, USA.*

### Table of contents

|                 |          |
|-----------------|----------|
| Table S1 .....  | p. 2     |
| Table S2 .....  | p. 3     |
| Table S3 .....  | p. 4-5   |
| Table S4 .....  | p. 6     |
| Table S5 .....  | p. 7-20  |
| Table S6 .....  | p. 21    |
| Table S7 .....  | p. 22    |
| Table S8 .....  | p. 23    |
| Table S9 .....  | p. 23    |
| Table S10 ..... | p. 25    |
| Table S11 ..... | p. 26-31 |
| Table S12 ..... | p. 32    |

**Table S1. Metadata of wild-caught individuals.**

| ID      | MVZ_IDs         | Localities | Latitude  | Longitude    | Sex | Body length (mm) | Weight (g) | BMI (g/mm <sup>2</sup> ) | Repro status | Carbon ( $\delta^{13}\text{C}$ ) | Nitrogen ( $\delta^{15}\text{N}$ ) | ClimatePC1   | ClimatePC2  | BarcodeSequence |
|---------|-----------------|------------|-----------|--------------|-----|------------------|------------|--------------------------|--------------|----------------------------------|------------------------------------|--------------|-------------|-----------------|
| MPR.108 | MVZ:Mamm:230591 | FL         | 29.67445  | -82.33093333 | F   | 77               | 13.0       | 0.002192613              | adult        | -21.8                            | 5.2                                | 2.97062216   | 1.499308753 | CGGACTCGTTAC    |
| MPR.110 | MVZ:Mamm:230601 | FL         | 29.6233   | -82.340333   | F   | 90               | 23.5       | 0.002901235              | pregnant     | -21.8                            | 7                                  | 3.096504907  | 1.513670142 | TCCTGCACCTGGA   |
| MPR.112 | MVZ:Mamm:230593 | FL         | 29.778929 | -82.416971   | M   | 77               | 12.8       | 0.002150447              | adult        | -18.8                            | 5.9                                | 2.998892477  | 1.501471275 | TTCTGGTCTTGT    |
| MPR.113 | MVZ:Mamm:230590 | FL         | 29.78685  | -82.495877   | F   | 84               | 11.4       | 0.001612103              | adult        | -20                              | 6.2                                | 2.998892477  | 1.501471275 | GTCCACTGGAC     |
| MPR.114 | MVZ:Mamm:230603 | FL         | 29.37283  | -82.19892    | F   | 84               | 15.5       | 0.002196712              | pregnant     | -22.2                            | 8                                  | 3.100624164  | 1.464651522 | GATTTAGAGGCT    |
| MPR.115 | MVZ:Mamm:230595 | FL         | 29.45224  | -82.3403     | F   | 84               | 14.0       | 0.001984127              | adult        | -22.6                            | 4.5                                | 3.205937396  | 1.469365645 | GTCACGCCGTTAA   |
| MPR.116 | MVZ:Mamm:230597 | FL         | 29.39018  | -82.1299     | M   | 82               | 14.3       | 0.002119274              | adult        | -17.9                            | 7.1                                | 3.028607066  | 1.351687486 | ACGGTTTCTGGA    |
| MPR.118 | MVZ:Mamm:230599 | FL         | 29.10066  | -82.14192    | M   | 68               | 9.5        | 0.002054498              | adult        | -21.8                            | 7.1                                | 3.133622652  | 1.147339587 | GCAGCCATATTG    |
| MPR.120 | MVZ:Mamm:230594 | FL         | 29.7828   | -82.3755     | M   | 82.5             | 14.0       | 0.002056933              | adult        | -24.2                            | 7.7                                | 2.998892477  | 1.501471275 | ATAGGTGTGCTA    |
| MPR.121 | MVZ:Mamm:230596 | FL         | 29.65652  | -82.5872     | F   | 92               | 23.0       | 0.002717391              | pregnant     | -16.8                            | 7.6                                | 3.052686779  | 1.310811624 | ACCTAGCTAGTG    |
| MPR.123 | MVZ:Mamm:230612 | GA         | 34.0989   | -83.3454     | M   | 75.5             | 11.0       | 0.00192974               | adult        | -17.9                            | 7.1                                | 0.694382471  | 2.870810123 | GTCCTGACACTG    |
| MPR.124 | MVZ:Mamm:230604 | GA         | 34.10006  | -83.59695    | F   | 78               | 14.5       | 0.0023833                | pregnant     | -19.9                            | 6.5                                | 0.720716609  | 2.954123495 | GGACTCAACTAA    |
| MPR.125 | MVZ:Mamm:230609 | GA         | 34.09889  | -83.34537    | M   | 69               | 11.0       | 0.002310439              | adult        | -21.4                            | 9.9                                | 0.694382471  | 2.870810123 | ATACGGGTTCGT    |
| MPR.126 | MVZ:Mamm:230608 | GA         | 34.11877  | -83.57092    | M   | 80               | 18.5       | 0.002890625              | adult        | -14.8                            | 7.3                                | 0.720716609  | 2.954123495 | CCTTTCACCTGT    |
| MPR.128 | MVZ:Mamm:230606 | GA         | 33.87025  | -83.28893    | M   | 81               | 15.8       | 0.002400549              | adult        | -21.3                            | 7.8                                | 0.558088177  | 2.61167319  | ATCAGCCAGCTC    |
| MPR.129 | MVZ:Mamm:230615 | GA         | 33.83757  | -83.35049    | M   | 77               | 12.8       | 0.002150447              | adult        | -20.4                            | 6.6                                | 0.586814091  | 2.694032322 | GCTCCACACGFI    |
| MPR.130 | MVZ:Mamm:230610 | GA         | 33.94638  | -83.38383    | F   | 80               | 16.1       | 0.002519531              | adult        | -17.3                            | 6.4                                | 0.586814091  | 2.694032322 | AAGGAGTGCGCA    |
| MPR.131 | MVZ:Mamm:230613 | GA         | 33.88584  | -83.48023    | F   | 65               | 9.0        | 0.002130178              | pregnant     | -9.5                             | 9.6                                | 0.586814091  | 2.694032322 | AGGGAAGGATC     |
| MPR.132 | MVZ:Mamm:230614 | GA         | 33.8437   | -83.33744    | F   | 75.5             | 11.0       | 0.00192974               | adult        | -18.1                            | 7.8                                | 0.586814091  | 2.694032322 | ACGACGCATTTG    |
| MPR.133 | MVZ:Mamm:230607 | GA         | 33.94639  | -83.38384    | F   | 89               | 21.4       | 0.002698523              | pregnant     | -15.1                            | 7.8                                | 0.586814091  | 2.694032322 | CGTCACTCCAAG    |
| MPR.134 | MVZ:Mamm:230616 | NH-VT      | 44.11202  | -72.04543    | F   | 83               | 19.1       | 0.002776165              | adult        | -18                              | 8.3                                | -2.941483795 | 2.077455579 | TTACACAAGGC     |
| MPR.135 | MVZ:Mamm:230617 | NH-VT      | 44.11212  | -72.04551    | F   | 93               | 21.4       | 0.002471384              | adult        | -15.5                            | 7.5                                | -2.941483795 | 2.077455579 | GTATAGTCCGTG    |
| MPR.137 | MVZ:Mamm:230619 | NH-VT      | 43.99797  | -72.10448    | F   | 81               | 13.4       | 0.002038561              | adult        | -17.6                            | 10.8                               | -2.873866295 | 2.449812    | TCGTAAAGCCGC    |
| MPR.138 | MVZ:Mamm:230622 | NH-VT      | 43.97192  | -72.08463    | M   | 86               | 14.8       | 0.001994321              | adult        | -23.4                            | 5.7                                | -2.873866295 | 2.449812    | TGACGCCTCCAA    |
| MPR.140 | MVZ:Mamm:230621 | NH-VT      | 43.97281  | -72.09393    | M   | 74               | 14.0       | 0.002556611              | adult        | -17.8                            | 6.3                                | -2.873866295 | 2.449812    | TTCTCGTTCCTC    |
| MPR.141 | MVZ:Mamm:230648 | NH-VT      | 43.95075  | -72.11753    | M   | 86               | 19.5       | 0.00263656               | adult        | -19.5                            | 11.8                               | -2.873866295 | 2.449812    | GCTACTGGTATG    |
| MPR.142 | MVZ:Mamm:230649 | NH-VT      | 43.9609   | -72.11585    | F   | 94               | 23.8       | 0.002687868              | pregnant     | -19.9                            | 7.6                                | -2.873866295 | 2.449812    | GAATCCTCACCG    |
| MPR.143 | MVZ:Mamm:230647 | NH-VT      | 43.927907 | -72.12301    | M   | 81.5             | 15.5       | 0.002333547              | adult        | -14.4                            | 11.3                               | -2.873866295 | 2.449812    | CCTGACACACAC    |
| MPR.144 | MVZ:Mamm:230651 | NH-VT      | 44.12806  | -72.04328    | M   | 87.5             | 18.3       | 0.002383673              | adult        | -15.5                            | 7.5                                | -2.941483795 | 2.077455579 | CAGCGTTTAGCC    |
| MPR.145 | MVZ:Mamm:230650 | NH-VT      | 43.95596  | -72.11164    | F   | 98               | 21.0       | 0.002186589              | adult        | -19.3                            | 6.7                                | -2.873866295 | 2.449812    | GGTATGGCTACT    |
| MPR.146 | MVZ:Mamm:230633 | PA         | 40.618763 | -75.36362    | F   | 86               | 13.1       | 0.001774608              | adult        | -19.9                            | 8                                  | -1.213822773 | 3.005363487 | ACAATGTCACAG    |
| MPR.147 | MVZ:Mamm:230627 | PA         | 40.50319  | -75.3174     | M   | 87               | 16.0       | 0.002113886              | adult        | -20.5                            | 6.7                                | -1.221697022 | 3.105731663 | GCCATAGTGTGT    |
| MPR.148 | MVZ:Mamm:230628 | PA         | 40.45099  | -75.40128    | M   | 75               | 13.3       | 0.002355556              | adult        | -21.6                            | 6.1                                | -1.21210531  | 3.021371305 | GGTCCCGAAATT    |
| MPR.150 | MVZ:Mamm:230631 | PA         | 40.59571  | -75.65891    | F   | 75               | 11.9       | 0.002111111              | adult        | -23.8                            | 5.9                                | -1.253146437 | 2.969723195 | TCTGCGAGTCTG    |
| MPR.151 | MVZ:Mamm:230634 | PA         | 40.55189  | -75.32455    | M   | 78.5             | 15.0       | 0.002434176              | adult        | -23.2                            | 7.1                                | -1.221697022 | 3.105731663 | ATGTAGGCTTAG    |
| MPR.152 | MVZ:Mamm:230629 | PA         | 40.53107  | -75.34738    | M   | 81               | 15.0       | 0.002286237              | adult        | -15.4                            | 6.7                                | -1.213822773 | 3.005363487 | TGCTTCCAATT     |
| MPR.153 | MVZ:Mamm:230624 | PA         | 40.500421 | -76.103425   | F   | 81.5             | 21.3       | 0.003199217              | pregnant     | -10.7                            | 8.4                                | -1.362674566 | 3.08747214  | GCCGAGATAATT    |
| MPR.154 | MVZ:Mamm:230623 | PA         | 40.461968 | -76.08789    | F   | 82               | 17.3       | 0.002565437              | adult        | -19.9                            | 6.3                                | -1.277569614 | 2.900451084 | TCGAGTATCGAA    |
| MPR.155 | MVZ:Mamm:230632 | PA         | 40.70747  | -75.66738    | M   | 78               | 14.5       | 0.0023833                | adult        | -19.9                            | 7.6                                | -1.375142871 | 3.180181879 | GCCCTATCTTCT    |
| MPR.156 | MVZ:Mamm:230625 | PA         | 40.526708 | -76.097258   | F   | 96               | 21.0       | 0.002278646              | adult        | -17                              | 6.8                                | -1.362674566 | 3.08747214  | AGGTACGCAATT    |
| MPR.159 | MVZ:Mamm:230641 | VA         | 37.74117  | -77.57546    | F   | 77               | 14.8       | 0.002487772              | adult        | -23.5                            | 7.4                                | -0.54705521  | 2.680888784 | GTCCCTATTATC    |
| MPR.161 | MVZ:Mamm:230638 | VA         | 37.65535  | -77.72927    | F   | 80               | 15.3       | 0.002382813              | pregnant     | -24.1                            | 8                                  | -0.52685297  | 2.654121765 | TGGGACATATCC    |
| MPR.162 | MVZ:Mamm:230645 | VA         | 37.48763  | -77.40208    | M   | 86               | 17.3       | 0.002332342              | adult        | -19.5                            | 6.5                                | -0.145751223 | 2.590674625 | GAACGATCATGT    |
| MPR.163 | MVZ:Mamm:230637 | VA         | 37.65501  | -77.73977    | M   | 78               | 15.1       | 0.002486029              | adult        | -22.8                            | 5.9                                | -0.52685297  | 2.654121765 | TTCAGACCAGCC    |
| MPR.164 | MVZ:Mamm:230642 | VA         | 37.67885  | -77.5166     | M   | 91               | 18.3       | 0.00220384               | adult        | -20.3                            | 6.9                                | -0.54705521  | 2.680888784 | ACGCATCGCACT    |
| MPR.165 | MVZ:Mamm:230644 | VA         | 37.55811  | -77.48073    | M   | 66               | 10.8       | 0.00246786               | adult        | -19.3                            | 8.2                                | -0.366753804 | 2.692423969 | CAGTAGCGATAT    |
| MPR.166 | MVZ:Mamm:230639 | VA         | 37.76063  | -77.48351    | M   | 80               | 15.0       | 0.00234375               | adult        | -19                              | 5.9                                | -0.468067251 | 2.664179717 | TCCTTGTCTCC     |
| MPR.167 | MVZ:Mamm:230635 | VA         | 37.52756  | -77.6492     | F   | 80               | 13.0       | 0.00203125               | adult        | -14.7                            | 9.6                                | -0.488569853 | 2.718535468 | ACGAGACTGATT    |
| MPR.168 | MVZ:Mamm:230646 | VA         | 37.85448  | -77.26262    | F   | 82               | 13.5       | 0.002007733              | pregnant     | NA                               | NA                                 | -0.475831808 | 2.715734487 | GCTGTACGGATT    |
| MPR.169 | MVZ:Mamm:230636 | VA         | 37.55537  | -77.66149    | F   | 69               | 11.0       | 0.002310439              | adult        | -14.1                            | 7.5                                | -0.488569853 | 2.718535468 | ATCACCAGGTGT    |

**Table S2.** Principal components of climatic variables.

|       | PC1 (69.2%) | PC2 (22.1%) | PC3 (4.6%) | Prin4 (3.6%) |
|-------|-------------|-------------|------------|--------------|
| bio1  | 0.27111     | 0.0579      | 0.11257    | 0.09989      |
| bio2  | 0.1859      | -0.00256    | -0.44368   | 0.7295       |
| bio3  | 0.27115     | -0.06465    | -0.04618   | 0.12554      |
| bio4  | -0.27493    | 0.02479     | -0.03135   | -0.02992     |
| bio5  | 0.25218     | 0.159       | 0.19138    | 0.16051      |
| bio6  | 0.27079     | 0.05962     | 0.14904    | 0.03134      |
| bio7  | -0.27357    | -0.00493    | -0.12247   | 0.03852      |
| bio8  | 0.06238     | -0.36347    | 0.63004    | 0.23546      |
| bio9  | 0.25284     | 0.16393     | -0.20573   | -0.01738     |
| bio10 | 0.25949     | 0.12593     | 0.18248    | 0.141        |
| bio11 | 0.27311     | 0.03834     | 0.097      | 0.07757      |
| bio12 | 0.25318     | 0.10785     | -0.00326   | -0.38185     |
| bio13 | 0.25923     | -0.12326    | -0.14616   | -0.20514     |
| bio14 | -0.01549    | 0.48149     | 0.12471    | 0.04536      |
| bio15 | 0.21244     | -0.2939     | -0.18019   | -0.14671     |
| bio16 | 0.25764     | -0.13577    | -0.10009   | -0.24175     |
| bio17 | -0.00357    | 0.46494     | 0.30991    | -0.04143     |
| bio18 | 0.22948     | -0.25794    | 0.06483    | -0.17746     |
| bio19 | 0.16001     | 0.37484     | -0.22778   | -0.16795     |

**Table S3.** Metadata of lab reared individuals from the most northern and southern populations.

| ID     | Breeding ID   | Locality    | Sex | Weight (g) | Age at collection (days) | Carbon ( $\delta^{13}\text{C}$ ) | Nitrogen ( $\delta^{15}\text{N}$ ) | BarcodeSequence |
|--------|---------------|-------------|-----|------------|--------------------------|----------------------------------|------------------------------------|-----------------|
| FL01F1 | F1(DL95x54)   | Florida_Lab | F   | 16.6       | 146                      | -19.0                            | 6.7                                | TTGGTCTCCTCT    |
| FL01F2 | F1(DL95x54)   | Florida_Lab | F   | 19         | 146                      | -19.0                            | 6.7                                | CTGCATACTGAG    |
| FL01M1 | F1(DL95x54)   | Florida_Lab | M   | 23.6       | 146                      | -19.0                            | 6.7                                | TACCTAGTGAGA    |
| FL01M2 | F1(DL95x54)   | Florida_Lab | M   | 21         | 146                      | -19.0                            | 6.7                                | CGTTCTGGTGGT    |
| FL02F1 | F1(DL105x71)3 | Florida_Lab | F   | 15.7       | 194                      | -19.0                            | 6.7                                | GTCAATTAGTGG    |
| FL02F2 | F1(DL105x71)1 | Florida_Lab | F   | 16.2       | 264                      | -19.0                            | 6.7                                | AGTACGCAGTCT    |
| FL02M1 | F1(DL105x71)2 | Florida_Lab | M   | 20.2       | 242                      | -19.0                            | 6.7                                | CAGGGCCTTTGT    |
| FL02M2 | F1(DL105x71)  | Florida_Lab | M   | 23.5       | 194                      | -19.0                            | 6.7                                | CGATGAATATCG    |
| FL03F1 | F1(DL107x83)  | Florida_Lab | F   | 17.5       | 194                      | -19.0                            | 6.7                                | TTCCCGAAACGA    |
| FL03F2 | F1(DL107x83)3 | Florida_Lab | F   | 20.5       | 265                      | -19.0                            | 6.7                                | GAACCTTAGCGC    |
| FL03M1 | F1(DL107x83)4 | Florida_Lab | M   | 25         | 194                      | -19.0                            | 6.7                                | AGCAGCTATTGC    |
| FL03M2 | F1(DL107x83)6 | Florida_Lab | M   | 27.2       | 194                      | -19.0                            | 6.7                                | CTCGGATAGATC    |
| FL04F1 | F1(DL58x59)5  | Florida_Lab | F   | 12.9       | 169                      | -19.0                            | 6.7                                | TACTGAGCCTCG    |
| FL04F2 | F1(DL58x59)7  | Florida_Lab | F   | 15.5       | 169                      | -19.0                            | 6.7                                | AGAAGGCCTTAT    |
| FL04M1 | F1(DL58x59)   | Florida_Lab | M   | 20         | 148                      | -19.0                            | 6.7                                | TCCTTAGAAGGC    |
| FL04M2 | F1(DL58x59)   | Florida_Lab | M   | 20.9       | 148                      | -19.0                            | 6.7                                | GATGGACTTCAA    |
| FL05F1 | F1(DL69x77)3  | Florida_Lab | F   | 11.9       | 126                      | -19.0                            | 6.7                                | CATCGCGTTGAC    |
| FL05F2 | F1(DL69x77)1  | Florida_Lab | F   | 11.8       | 126                      | -19.0                            | 6.7                                | GCACATAGTCGT    |
| FL05M1 | F1(DL69x77)   | Florida_Lab | M   | 19.5       | 129                      | -19.0                            | 6.7                                | GGAATTATCGGT    |
| FL05M2 | F1(DL69x77)   | Florida_Lab | M   | 15.8       | 129                      | -19.0                            | 6.7                                | CATCAAGCATAG    |
| FL06F1 | F1(DL52x49)   | Florida_Lab | F   | 16.1       | 177                      | -19.0                            | 6.7                                | CCTAGTAAGCTG    |
| FL06F2 | F1(DL52x49)   | Florida_Lab | F   | 12.5       | 100                      | -19.0                            | 6.7                                | TTACCGACGAGT    |
| FL06M1 | F1(DL52x49)   | Florida_Lab | M   | 19.2       | 177                      | -19.0                            | 6.7                                | GGCAAATACACT    |
| FL06M2 | F1(DL52x49)   | Florida_Lab | M   | 14.2       | 128                      | -19.0                            | 6.7                                | GTCATGCTCCAG    |
| FL07F1 | F1(DL80x85)5  | Florida_Lab | F   | 13.5       | 232                      | -19.0                            | 6.7                                | TTACCTTACACC    |
| FL07F2 | F1(DL80x85)3  | Florida_Lab | F   | 15.6       | 232                      | -19.0                            | 6.7                                | TGACTAATGGCC    |
| FL07M1 | F1(DL80x85)   | Florida_Lab | M   | 15.4       | 148                      | -19.0                            | 6.7                                | GCTTAGATGTAG    |
| FL07M2 | F1(DL80x85)   | Florida_Lab | M   | 16.9       | 148                      | -19.0                            | 6.7                                | AAGACGTAGCGG    |
| FL08F1 | F1(DL67x66)3  | Florida_Lab | F   | 18.5       | 266                      | -19.0                            | 6.7                                | CACGTGACATGT    |
| FL08F2 | F1(DL67x66)5  | Florida_Lab | F   | 22         | 266                      | -19.0                            | 6.7                                | CACAGTTGAAGT    |
| FL08M1 | F1(DL67x66)   | Florida_Lab | M   | 21.1       | 205                      | -19.0                            | 6.7                                | CTCTCTCACTTG    |
| FL08M2 | F1(DL67x66)6  | Florida_Lab | M   | 21.5       | 205                      | -19.0                            | 6.7                                | ATTGCAAGCAAC    |
| FL09F1 | F1(DL81x82)1  | Florida_Lab | F   | 15         | 213                      | -19.0                            | 6.7                                | ACCGGAGTAGGA    |
| FL09F2 | F1(DL81x82)5  | Florida_Lab | F   | 13         | 146                      | -19.0                            | 6.7                                | TGAGGACTACCT    |
| FL09M1 | F1(DL81x82)   | Florida_Lab | M   | 17.5       | 147                      | -19.0                            | 6.7                                | CTAGGATCACTG    |
| FL09M2 | F1(DL81x82)2  | Florida_Lab | M   | 20.1       | 213                      | -19.0                            | 6.7                                | GATGACCCAAAT    |
| FL10F1 | F1(DL97x73)5  | Florida_Lab | F   | 15.5       | 200                      | -19.0                            | 6.7                                | TGACCGGCTGTT    |
| FL10F2 | F1(DL97x73)1  | Florida_Lab | F   | 15         | 200                      | -19.0                            | 6.7                                | GGAGGAGCAATA    |

|        |                 |              |   |      |     |       |     |              |
|--------|-----------------|--------------|---|------|-----|-------|-----|--------------|
| FL10M1 | F1(DL97x73)     | Florida_Lab  | M | 18.8 | 179 | -19.0 | 6.7 | CAATCGGCTTGC |
| FL10M2 | F1(DL97x73)     | Florida_Lab  | M | 18.4 | 179 | -19.0 | 6.7 | AACACTCGATCG |
| NY01F1 | F1(MJS19x13)5   | New_York_Lab | F | 17.8 | 235 | -19.1 | 6.4 | AGAGAGACAGGT |
| NY01F2 | F1(MJS19x13)3   | New_York_Lab | F | 17.9 | 235 | -19.1 | 6.4 | TCGCCAGTGCAT |
| NY01M1 | F1(MJS19x13)8   | New_York_Lab | M | 20.1 | 142 | -19.1 | 6.4 | TCAACCCGTGAA |
| NY01M2 | F1(MJS19x13)10  | New_York_Lab | M | 21.5 | 142 | -19.1 | 6.4 | GTTTGAAACACG |
| NY02F1 | F1(MJS66x67)3   | New_York_Lab | F | 13.5 | 166 | -19.1 | 6.4 | TCTAGCCTGGCA |
| NY02F2 | F1(MJS66x67)1   | New_York_Lab | F | 16.8 | 166 | -19.1 | 6.4 | AATGCAATGCGT |
| NY02M1 | F1(MJS66x67)    | New_York_Lab | M | 21   | 140 | -19.1 | 6.4 | GCTCAGGACTCT |
| NY02M2 | F1(MJS66x67)    | New_York_Lab | M | 24.8 | 140 | -19.1 | 6.4 | CACTTTGGGTGC |
| NY03F1 | F1(MJS34x38)3   | New_York_Lab | F | 17.9 | 236 | -19.1 | 6.4 | ATCAGAGCCCAT |
| NY03F2 | F1(MJS34x38)1   | New_York_Lab | F | 22.1 | 236 | -19.1 | 6.4 | TCTGTAGAGCCA |
| NY03M1 | F1(MJS34x38)    | New_York_Lab | M | 20.1 | 144 | -19.1 | 6.4 | CGAATGAGTCAT |
| NY03M2 | F1(MJS34x38)2   | New_York_Lab | M | 22   | 210 | -19.1 | 6.4 | CAACGCTAGAAT |
| NY04F1 | F1(MJS44x42)5   | New_York_Lab | F | 16.4 | 165 | -19.1 | 6.4 | GACAACGAATCT |
| NY04F2 | F1(MJS44x42)9   | New_York_Lab | F | 17.8 | 233 | -19.1 | 6.4 | TGCGGTTGACTC |
| NY04M1 | F1(MJS44x42)    | New_York_Lab | M | 22.6 | 142 | -19.1 | 6.4 | CCGACTCTAGGT |
| NY04M2 | F1(MJS44x42)    | New_York_Lab | M | 23.9 | 142 | -19.1 | 6.4 | ATCCTACGAGCA |
| NY05F1 | F1(MJS49x60)    | New_York_Lab | F | 17.5 | 139 | -19.1 | 6.4 | CACAGGATTACC |
| NY05M1 | F1(MJS49x60)    | New_York_Lab | M | 23.4 | 139 | -19.1 | 6.4 | TGAGAAGAAAGG |
| NY05M2 | F1(MJS49x60)    | New_York_Lab | M | 25.1 | 139 | -19.1 | 6.4 | TCGGATCTGTGA |
| NY05M3 | F1(MJS49x60)    | New_York_Lab | M | 21.9 | 139 | -19.1 | 6.4 | GCCGGTACTCTA |
| NY06F1 | F1(MJS105x104)3 | New_York_Lab | F | 15   | 165 | -19.1 | 6.4 | TGTGTTACTCCT |
| NY06F2 | F1(MJS105x104)1 | New_York_Lab | F | 16.5 | 165 | -19.1 | 6.4 | GGTACCTGCAAT |
| NY06M1 | F1(MJS105x104)  | New_York_Lab | M | 24.2 | 141 | -19.1 | 6.4 | CGATATCAGTAG |
| NY06M2 | F1(MJS105x104)  | New_York_Lab | M | 25.2 | 141 | -19.1 | 6.4 | CATAAGGGAGGC |
| NY07F1 | F1(MJS9x11)5    | New_York_Lab | F | 20.1 | 154 | -19.1 | 6.4 | TAACCCGATAGA |
| NY07F2 | F1(MJS9x11)7    | New_York_Lab | F | 20   | 154 | -19.1 | 6.4 | GTGTGCTAACGT |
| NY07M1 | F1(MJS9x11)     | New_York_Lab | M | 20.9 | 133 | -19.1 | 6.4 | TCGCCTATAAGG |
| NY07M2 | F1(MJS9x11)     | New_York_Lab | M | 24.8 | 180 | -19.1 | 6.4 | AGTGGCACTATC |
| NY08F1 | F1(MJS83x80)    | New_York_Lab | F | 13.8 | 203 | -19.1 | 6.4 | ATTGCTGGTCGA |
| NY08F2 | F1(MJS83x80)1   | New_York_Lab | F | 15   | 226 | -19.1 | 6.4 | AAGAAGCCGGAC |
| NY08M1 | F1(MJS83x80)    | New_York_Lab | M | 17   | 130 | -19.1 | 6.4 | CTTGCGGCAATC |
| NY08M2 | F1(MJS83x80)4   | New_York_Lab | M | 16.2 | 203 | -19.1 | 6.4 | TGAGGTTTGATG |
| NY09F1 | F1(MJS82x81)1   | New_York_Lab | F | 21.1 | 226 | -19.1 | 6.4 | TCCGTCATGGGT |
| NY09F2 | F1(MJS82x81)7   | New_York_Lab | F | 23.2 | 169 | -19.1 | 6.4 | AGATCTATGCAG |
| NY09M1 | F1(MJS82x81)4   | New_York_Lab | M | 24.5 | 204 | -19.1 | 6.4 | ACGGGATACAGG |
| NY09M2 | F1(MJS82x81)    | New_York_Lab | M | 27   | 147 | -19.1 | 6.4 | AAGAGTCTCTAG |
| NY10F1 | F1(MJS92x91)5   | New_York_Lab | F | 17   | 226 | -19.1 | 6.4 | GCGAGTTCCTGT |
| NY10F2 | F1(MJS92x91)    | New_York_Lab | F | 20.9 | 168 | -19.1 | 6.4 | TTCCGAATCGGC |
| NY10M1 | F1(MJS92x91)2   | New_York_Lab | M | 24.2 | 204 | -19.1 | 6.4 | GCACAAGGCAAG |
| NY10M2 | F1(MJS92x91)    | New_York_Lab | M | 25.5 | 144 | -19.1 | 6.4 | CGGCAAACACTT |

**Table S4.** Correlations with latitude and metadata.

| Variable                       | All adult individuals |       |                   | Adults without pregnant females |       |                   |
|--------------------------------|-----------------------|-------|-------------------|---------------------------------|-------|-------------------|
|                                | n                     | rho   | p-value           | n                               | rho   | p-value           |
| Body weight (g)                | 50                    | 0.32  | <b>0.02</b>       | 40                              | 0.51  | <b>0.0008</b>     |
| BMI (g/mm <sup>2</sup> )       | 50                    | 0.21  | 0.14              | 40                              | 0.35  | <b>0.03</b>       |
| Diet ( $\delta^{13}\text{C}$ ) | 49                    | 0.19  | 0.19              | 40                              | 0.25  | 0.12              |
| Diet ( $\delta^{15}\text{N}$ ) | 49                    | 0.14  | 0.35              | 40                              | 0.24  | 0.14              |
| Climate PC1                    | 50                    | -0.97 | <b>&lt;0.0001</b> | 40                              | -0.98 | <b>&lt;0.0001</b> |
| Climate PC2                    | 50                    | 0.32  | <b>0.02</b>       | 40                              | 0.23  | 0.15              |

**Table S5. Human SNPs and genes associated with microbial measurements from previously published mGWAS.**

| References*           | chr | ps        | rs         | Gene1        | Gene2        | Gene3 | Gene4 | Gene5 | Gene6 | Gene7 | notes                                                             |
|-----------------------|-----|-----------|------------|--------------|--------------|-------|-------|-------|-------|-------|-------------------------------------------------------------------|
| Knights et al. 2014   | 5   | 130768383 | rs10051722 | rs10051722   |              |       |       |       |       |       | Associated with bacterial taxa from intestinal biopsies           |
| Knights et al. 2014   | 5   | 56143024  | rs10065637 | IL31RA       |              |       |       |       |       |       | Associated with bacterial taxa from intestinal biopsies           |
| Knights et al. 2014   | 2   | 62324337  | rs10865331 | rs10865331   |              |       |       |       |       |       | Associated with bacterial taxa from intestinal biopsies           |
| Knights et al. 2014   | 16  | 30471173  | rs11150589 | LOC613037    |              |       |       |       |       |       | Associated with bacterial taxa from intestinal biopsies           |
| Knights et al. 2014   | 5   | 593968    | rs11739663 | SLC9A3       |              |       |       |       |       |       | Associated with bacterial taxa from intestinal biopsies           |
| Knights et al. 2014   | 5   | 40410482  | rs11742570 | PTGER4       |              |       |       |       |       |       | Associated with bacterial taxa from intestinal biopsies           |
| Knights et al. 2014   | 7   | 2830351   | rs1182188  | LFNG         |              |       |       |       |       |       | Associated with bacterial taxa from intestinal biopsies           |
| Knights et al. 2014   | 2   | 198006693 | rs1440088  | SF3B1        |              |       |       |       |       |       | Associated with bacterial taxa from intestinal biopsies           |
| Knights et al. 2014   | 7   | 50264865  | rs1456896  | VWC2         |              |       |       |       |       |       | Associated with bacterial taxa from intestinal biopsies           |
| Knights et al. 2014   | 2   | 191066738 | rs1517352  | GLS          |              |       |       |       |       |       | Associated with bacterial taxa from intestinal biopsies           |
| Knights et al. 2014   | 13  | 26957130  | rs17085007 | GPR12        |              |       |       |       |       |       | Associated with bacterial taxa from intestinal biopsies           |
| Knights et al. 2014   | 2   | 198658398 | rs17229285 | rs17229285   |              |       |       |       |       |       | Associated with bacterial taxa from intestinal biopsies           |
| Knights et al. 2014   | 16  | 68557327  | rs1728785  | ZFP90        |              |       |       |       |       |       | Associated with bacterial taxa from intestinal biopsies           |
| Knights et al. 2014   | 15  | 67150258  | rs17293632 | SMAD3        |              |       |       |       |       |       | Associated with bacterial taxa from intestinal biopsies           |
| Knights et al. 2014   | 11  | 61785208  | rs174537   | SYT7         |              |       |       |       |       |       | Associated with bacterial taxa from intestinal biopsies           |
| Knights et al. 2014   | 17  | 72646784  | rs17780256 | LOC100499467 |              |       |       |       |       |       | Associated with bacterial taxa from intestinal biopsies           |
| Knights et al. 2014   | 6   | 90263440  | rs1847472  | rs1847472    |              |       |       |       |       |       | Associated with bacterial taxa from intestinal biopsies           |
| Knights et al. 2014   | 18  | 12809341  | rs1893217  | PTPN2        |              |       |       |       |       |       | Associated with bacterial taxa from intestinal biopsies           |
| Knights et al. 2014   | 6   | 159069404 | rs212388   | EZR          |              |       |       |       |       |       | Associated with bacterial taxa from intestinal biopsies           |
| Knights et al. 2014   | 22  | 39263768  | rs2413583  | TAB1         |              |       |       |       |       |       | Associated with bacterial taxa from intestinal biopsies           |
| Knights et al. 2014   | 1   | 197662011 | rs2488389  | CRB1         |              |       |       |       |       |       | Associated with bacterial taxa from intestinal biopsies           |
| Knights et al. 2014   | 5   | 135107916 | rs254560   | C5orf24      |              |       |       |       |       |       | Associated with bacterial taxa from intestinal biopsies           |
| Knights et al. 2014   | 1   | 200132792 | rs2816958  | NR5A2        |              |       |       |       |       |       | Associated with bacterial taxa from intestinal biopsies           |
| Knights et al. 2014   | 21  | 15445619  | rs2823286  | rs2823286    |              |       |       |       |       |       | Associated with bacterial taxa from intestinal biopsies           |
| Knights et al. 2014   | 15  | 41271752  | rs28374715 | INO80        |              |       |       |       |       |       | Associated with bacterial taxa from intestinal biopsies           |
| Knights et al. 2014   | 5   | 10695414  | rs2930047  | DAP          |              |       |       |       |       |       | Associated with bacterial taxa from intestinal biopsies           |
| Knights et al. 2014   | 3   | 49684099  | rs3197999  | MST1         |              |       |       |       |       |       | Associated with bacterial taxa from intestinal biopsies           |
| Knights et al. 2014   | 13  | 99255087  | rs3742130  | DOCK9        |              |       |       |       |       |       | Associated with bacterial taxa from intestinal biopsies           |
| Knights et al. 2014   | 13  | 43883789  | rs3764147  | ENOX1        |              |       |       |       |       |       | Associated with bacterial taxa from intestinal biopsies           |
| Knights et al. 2014   | 7   | 117255109 | rs38911    | ST7          |              |       |       |       |       |       | Associated with bacterial taxa from intestinal biopsies           |
| Knights et al. 2014   | 9   | 114790969 | rs4246905  | TNFSF15      |              |       |       |       |       |       | Associated with bacterial taxa from intestinal biopsies           |
| Knights et al. 2014   | 1   | 151829204 | rs4845604  | RORC         |              |       |       |       |       |       | Associated with bacterial taxa from intestinal biopsies           |
| Knights et al. 2014   | 16  | 11279463  | rs529866   | CLEC16A      |              |       |       |       |       |       | Associated with bacterial taxa from intestinal biopsies           |
| Knights et al. 2014   | 11  | 114516108 | rs561722   | NNMT         |              |       |       |       |       |       | Associated with bacterial taxa from intestinal biopsies           |
| Knights et al. 2014   | 16  | 50722863  | rs5743289  | ADCY7        |              |       |       |       |       |       | Associated with bacterial taxa from intestinal biopsies           |
| Knights et al. 2014   | 20  | 35211477  | rs6088765  | MYH7B        |              |       |       |       |       |       | Associated with bacterial taxa from intestinal biopsies           |
| Knights et al. 2014   | 1   | 155908941 | rs670523   | rs670523     |              |       |       |       |       |       | Associated with bacterial taxa from intestinal biopsies           |
| Knights et al. 2014   | 2   | 102446909 | rs6708413  | IL18RAP      |              |       |       |       |       |       | Associated with bacterial taxa from intestinal biopsies           |
| Knights et al. 2014   | 2   | 65440138  | rs6740462  | SPRED2       |              |       |       |       |       |       | Associated with bacterial taxa from intestinal biopsies           |
| Knights et al. 2014   | 5   | 159399784 | rs6871626  | IL12B        |              |       |       |       |       |       | Associated with bacterial taxa from intestinal biopsies           |
| Knights et al. 2014   | 6   | 137685367 | rs6920220  | OLIG3        |              |       |       |       |       |       | Associated with bacterial taxa from intestinal biopsies           |
| Knights et al. 2014   | 8   | 89863690  | rs7015630  | RIPK2        |              |       |       |       |       |       | Associated with bacterial taxa from intestinal biopsies           |
| Knights et al. 2014   | 18  | 69863203  | rs727088   | CD226        |              |       |       |       |       |       | Associated with bacterial taxa from intestinal biopsies           |
| Knights et al. 2014   | 4   | 48361228  | rs7438704  | TXK          |              |       |       |       |       |       | Associated with bacterial taxa from intestinal biopsies           |
| Knights et al. 2014   | 1   | 172884320 | rs7517810  | FASLG        |              |       |       |       |       |       | Associated with bacterial taxa from intestinal biopsies           |
| Knights et al. 2014   | 2   | 60977721  | rs7608910  | PAPOLG       |              |       |       |       |       |       | Associated with bacterial taxa from intestinal biopsies           |
| Knights et al. 2014   | 8   | 125522429 | rs921720   | TRIB1        |              |       |       |       |       |       | Associated with bacterial taxa from intestinal biopsies           |
| Knights et al. 2014   | 3   | 53028645  | rs9847710  | PRKCD        |              |       |       |       |       |       | Associated with bacterial taxa from intestinal biopsies           |
| Knights et al. 2014   | NA  | NA        | NA         | NOD2         |              |       |       |       |       |       | NOD2 gene associated with bacterial taxa from intestinal biopsies |
| Davenport et al. 2015 | 2   | 26320519  | rs10048683 | RAB10        | RP11-214J9.1 |       |       |       |       |       | Associated with bacterial taxa from stool                         |
| Davenport et al. 2015 | 14  | 83577467  | rs10132493 |              |              |       |       |       |       |       | Associated with bacterial taxa from stool                         |
| Davenport et al. 2015 | 2   | 18924471  | rs10173922 |              |              |       |       |       |       |       | Associated with bacterial taxa from stool                         |
| Davenport et al. 2015 | 2   | 84428819  | rs10180739 |              |              |       |       |       |       |       | Associated with bacterial taxa from stool                         |
| Davenport et al. 2015 | 1   | 209512373 | rs1021993  |              |              |       |       |       |       |       | Associated with bacterial taxa from stool                         |
| Davenport et al. 2015 | 2   | 84519663  | rs1031532  | FUNDC2P2     |              |       |       |       |       |       | Associated with bacterial taxa from stool                         |
| Davenport et al. 2015 | 1   | 165399577 | rs10489747 | RXRG         |              |       |       |       |       |       | Associated with bacterial taxa from stool                         |
| Davenport et al. 2015 | 2   | 56772337  | rs10490411 |              |              |       |       |       |       |       | Associated with bacterial taxa from stool                         |
| Davenport et al. 2015 | 1   | 209527706 | rs10494924 |              |              |       |       |       |       |       | Associated with bacterial taxa from stool                         |
| Davenport et al. 2015 | 1   | 216722622 | rs10495027 | ESRRG        |              |       |       |       |       |       | Associated with bacterial taxa from stool                         |

|                       |    |           |            |               |               |               |                                           |
|-----------------------|----|-----------|------------|---------------|---------------|---------------|-------------------------------------------|
| Davenport et al. 2015 | 2  | 115697773 | rs10496481 | DPP10         |               |               | Associated with bacterial taxa from stool |
| Davenport et al. 2015 | 14 | 81124336  | rs10498546 | CEP128        |               |               | Associated with bacterial taxa from stool |
| Davenport et al. 2015 | 8  | 17535058  | rs10503602 | MTUS1         | MIR548V       |               | Associated with bacterial taxa from stool |
| Davenport et al. 2015 | 12 | 71408076  | rs10506621 | CTD-2021H9.1  |               |               | Associated with bacterial taxa from stool |
| Davenport et al. 2015 | 9  | 14141071  | rs10511591 | NFIB          |               |               | Associated with bacterial taxa from stool |
| Davenport et al. 2015 | 4  | 91740550  | rs10516879 | CCSER1        |               |               | Associated with bacterial taxa from stool |
| Davenport et al. 2015 | 11 | 30874751  | rs10767880 | DCDC1         |               |               | Associated with bacterial taxa from stool |
| Davenport et al. 2015 | 11 | 32300458  | rs10767929 | RP1-65P5.1    |               |               | Associated with bacterial taxa from stool |
| Davenport et al. 2015 | 12 | 23493161  | rs10770976 |               |               |               | Associated with bacterial taxa from stool |
| Davenport et al. 2015 | 11 | 19142375  | rs10833064 | ZDHC13        |               |               | Associated with bacterial taxa from stool |
| Davenport et al. 2015 | 12 | 23258003  | rs10842120 | RP11-153K16.1 | RP11-686N4.1  | RP11-114G22.1 | Associated with bacterial taxa from stool |
| Davenport et al. 2015 | 12 | 24864421  | rs10842398 | RN7SL38P      | RP11-625L16.1 |               | Associated with bacterial taxa from stool |
| Davenport et al. 2015 | 2  | 84433641  | rs10865473 |               |               |               | Associated with bacterial taxa from stool |
| Davenport et al. 2015 | 6  | 124236735 | rs10872275 | NKAIN2        |               |               | Associated with bacterial taxa from stool |
| Davenport et al. 2015 | 9  | 27688778  | rs10968061 |               |               |               | Associated with bacterial taxa from stool |
| Davenport et al. 2015 | 11 | 19853179  | rs11025278 | NAV2          |               |               | Associated with bacterial taxa from stool |
| Davenport et al. 2015 | 12 | 24875122  | rs11047591 | RP11-625L16.1 |               |               | Associated with bacterial taxa from stool |
| Davenport et al. 2015 | 1  | 216722328 | rs11117612 | ESRRG         |               |               | Associated with bacterial taxa from stool |
| Davenport et al. 2015 | 2  | 115683104 | rs11123259 | DPP10         |               |               | Associated with bacterial taxa from stool |
| Davenport et al. 2015 | 2  | 84433756  | rs11126953 |               |               |               | Associated with bacterial taxa from stool |
| Davenport et al. 2015 | 2  | 84433896  | rs11126954 |               |               |               | Associated with bacterial taxa from stool |
| Davenport et al. 2015 | 8  | 17535257  | rs11203893 | MTUS1         | MIR548V       |               | Associated with bacterial taxa from stool |
| Davenport et al. 2015 | 10 | 1702581   | rs11250714 | ADARB2        |               |               | Associated with bacterial taxa from stool |
| Davenport et al. 2015 | 10 | 71503932  | rs11596374 |               |               |               | Associated with bacterial taxa from stool |
| Davenport et al. 2015 | 10 | 124037599 | rs11596483 | BTBD16        |               |               | Associated with bacterial taxa from stool |
| Davenport et al. 2015 | 8  | 59305290  | rs1160133  |               |               |               | Associated with bacterial taxa from stool |
| Davenport et al. 2015 | 17 | 10458111  | rs11651216 | MYH2          | CTC-297N7.11  |               | Associated with bacterial taxa from stool |
| Davenport et al. 2015 | 2  | 84528756  | rs11686691 |               |               |               | Associated with bacterial taxa from stool |
| Davenport et al. 2015 | 20 | 17264604  | rs11696277 | PCSK2         |               |               | Associated with bacterial taxa from stool |
| Davenport et al. 2015 | 6  | 87236328  | rs11751618 |               |               |               | Associated with bacterial taxa from stool |
| Davenport et al. 2015 | 12 | 71412932  | rs11837284 | CTD-2021H9.1  |               |               | Associated with bacterial taxa from stool |
| Davenport et al. 2015 | 4  | 100477462 | rs11935423 | TRMT10A       |               |               | Associated with bacterial taxa from stool |
| Davenport et al. 2015 | 1  | 216716320 | rs12145418 | ESRRG         |               |               | Associated with bacterial taxa from stool |
| Davenport et al. 2015 | 6  | 124218474 | rs12208734 | NKAIN2        |               |               | Associated with bacterial taxa from stool |
| Davenport et al. 2015 | 10 | 86548569  | rs12240997 |               |               |               | Associated with bacterial taxa from stool |
| Davenport et al. 2015 | 9  | 21656749  | rs12338476 |               |               |               | Associated with bacterial taxa from stool |
| Davenport et al. 2015 | 12 | 45290466  | rs12367572 | NELL2         |               |               | Associated with bacterial taxa from stool |
| Davenport et al. 2015 | 6  | 124235916 | rs12530210 | NKAIN2        |               |               | Associated with bacterial taxa from stool |
| Davenport et al. 2015 | 6  | 124236284 | rs12530266 | NKAIN2        |               |               | Associated with bacterial taxa from stool |
| Davenport et al. 2015 | 8  | 117918897 | rs12541437 |               |               |               | Associated with bacterial taxa from stool |
| Davenport et al. 2015 | 2  | 84437352  | rs12714120 |               |               |               | Associated with bacterial taxa from stool |
| Davenport et al. 2015 | 1  | 216716537 | rs12757165 | ESRRG         |               |               | Associated with bacterial taxa from stool |
| Davenport et al. 2015 | 4  | 109301049 | rs13132148 |               |               |               | Associated with bacterial taxa from stool |
| Davenport et al. 2015 | 8  | 17523779  | rs13262658 | MTUS1         |               |               | Associated with bacterial taxa from stool |
| Davenport et al. 2015 | 2  | 38745624  | rs13423976 | AC016995.3    |               |               | Associated with bacterial taxa from stool |
| Davenport et al. 2015 | 12 | 24856642  | rs1386638  | RN7SL38P      | RP11-625L16.1 |               | Associated with bacterial taxa from stool |
| Davenport et al. 2015 | 1  | 209488564 | rs1395747  |               |               |               | Associated with bacterial taxa from stool |
| Davenport et al. 2015 | 11 | 30892824  | rs1448938  | DCDC1         |               |               | Associated with bacterial taxa from stool |
| Davenport et al. 2015 | 11 | 15726208  | rs1466553  | RP11-396O20.2 | RP11-396O20.1 |               | Associated with bacterial taxa from stool |
| Davenport et al. 2015 | 11 | 15729415  | rs1471759  | RP11-396O20.2 | RP11-396O20.1 |               | Associated with bacterial taxa from stool |
| Davenport et al. 2015 | 6  | 124248788 | rs1490350  | NKAIN2        |               |               | Associated with bacterial taxa from stool |
| Davenport et al. 2015 | 6  | 124236221 | rs1490359  | NKAIN2        |               |               | Associated with bacterial taxa from stool |
| Davenport et al. 2015 | 6  | 124236318 | rs1490360  | NKAIN2        |               |               | Associated with bacterial taxa from stool |
| Davenport et al. 2015 | 18 | 26248508  | rs1496486  |               |               |               | Associated with bacterial taxa from stool |
| Davenport et al. 2015 | 2  | 25714916  | rs1507705  | DTNB          |               |               | Associated with bacterial taxa from stool |
| Davenport et al. 2015 | 6  | 87248029  | rs1508348  |               |               |               | Associated with bacterial taxa from stool |
| Davenport et al. 2015 | 1  | 103040474 | rs1517426  |               |               |               | Associated with bacterial taxa from stool |
| Davenport et al. 2015 | 2  | 16186454  | rs1529404  | AC010145.4    | AC130710.1    |               | Associated with bacterial taxa from stool |
| Davenport et al. 2015 | 12 | 24858390  | rs1565122  | RN7SL38P      | RP11-625L16.1 |               | Associated with bacterial taxa from stool |
| Davenport et al. 2015 | 18 | 26245677  | rs1615700  |               |               |               | Associated with bacterial taxa from stool |
| Davenport et al. 2015 | 18 | 26246051  | rs1618992  |               |               |               | Associated with bacterial taxa from stool |
| Davenport et al. 2015 | 2  | 170151746 | rs16856759 | LRP2          |               |               | Associated with bacterial taxa from stool |
| Davenport et al. 2015 | 2  | 7171364   | rs16865853 | RNF144A       |               |               | Associated with bacterial taxa from stool |



|                       |    |           |            |               |                 |               |  |                                           |
|-----------------------|----|-----------|------------|---------------|-----------------|---------------|--|-------------------------------------------|
| Davenport et al. 2015 | 2  | 7186608   | rs16865867 | RNF144A       |                 |               |  | Associated with bacterial taxa from stool |
| Davenport et al. 2015 | 8  | 97327679  | rs16894459 | PTDSS1        |                 |               |  | Associated with bacterial taxa from stool |
| Davenport et al. 2015 | 9  | 21673153  | rs16938524 |               |                 |               |  | Associated with bacterial taxa from stool |
| Davenport et al. 2015 | 4  | 109385403 | rs17039065 |               |                 |               |  | Associated with bacterial taxa from stool |
| Davenport et al. 2015 | 2  | 56771307  | rs17039629 |               |                 |               |  | Associated with bacterial taxa from stool |
| Davenport et al. 2015 | 2  | 56798398  | rs17048179 |               |                 |               |  | Associated with bacterial taxa from stool |
| Davenport et al. 2015 | 2  | 129752049 | rs17048958 |               |                 |               |  | Associated with bacterial taxa from stool |
| Davenport et al. 2015 | 6  | 124237244 | rs17086323 | NKAIN2        |                 |               |  | Associated with bacterial taxa from stool |
| Davenport et al. 2015 | 10 | 124041701 | rs17103336 | BTBD16        |                 |               |  | Associated with bacterial taxa from stool |
| Davenport et al. 2015 | 10 | 86427347  | rs17103802 |               |                 |               |  | Associated with bacterial taxa from stool |
| Davenport et al. 2015 | 10 | 86547930  | rs17104132 |               |                 |               |  | Associated with bacterial taxa from stool |
| Davenport et al. 2015 | 10 | 86426712  | rs17259859 |               |                 |               |  | Associated with bacterial taxa from stool |
| Davenport et al. 2015 | 2  | 56750209  | rs17268931 |               |                 |               |  | Associated with bacterial taxa from stool |
| Davenport et al. 2015 | 3  | 120106820 | rs1733329  | FSTL1         | RP11-174O3.4    |               |  | Associated with bacterial taxa from stool |
| Davenport et al. 2015 | 12 | 23259999  | rs17459026 | RP11-153K16.1 | RP11-686N4.1    | RP11-114G22.1 |  | Associated with bacterial taxa from stool |
| Davenport et al. 2015 | 3  | 189498828 | rs17505775 | TP63          |                 |               |  | Associated with bacterial taxa from stool |
| Davenport et al. 2015 | 10 | 83289794  | rs17551124 |               |                 |               |  | Associated with bacterial taxa from stool |
| Davenport et al. 2015 | 2  | 6863415   | rs17649894 | LINC00487     |                 |               |  | Associated with bacterial taxa from stool |
| Davenport et al. 2015 | 4  | 177610424 | rs17697515 | VEGFC         | RP11-313E19.2   |               |  | Associated with bacterial taxa from stool |
| Davenport et al. 2015 | 4  | 92368346  | rs1922233  | CCSER1        |                 |               |  | Associated with bacterial taxa from stool |
| Davenport et al. 2015 | 2  | 25729721  | rs1965239  | DTNB          |                 |               |  | Associated with bacterial taxa from stool |
| Davenport et al. 2015 | 2  | 56743667  | rs1978531  |               |                 |               |  | Associated with bacterial taxa from stool |
| Davenport et al. 2015 | 5  | 125020797 | rs2029549  |               |                 |               |  | Associated with bacterial taxa from stool |
| Davenport et al. 2015 | 5  | 125020984 | rs2029550  |               |                 |               |  | Associated with bacterial taxa from stool |
| Davenport et al. 2015 | 12 | 45239348  | rs2055676  | NELL2         |                 |               |  | Associated with bacterial taxa from stool |
| Davenport et al. 2015 | 12 | 45238904  | rs2055677  | NELL2         |                 |               |  | Associated with bacterial taxa from stool |
| Davenport et al. 2015 | 2  | 84534978  | rs2061080  |               |                 |               |  | Associated with bacterial taxa from stool |
| Davenport et al. 2015 | 4  | 126408144 | rs2068148  | FAT4          |                 |               |  | Associated with bacterial taxa from stool |
| Davenport et al. 2015 | 10 | 124045854 | rs2104176  | BTBD16        |                 |               |  | Associated with bacterial taxa from stool |
| Davenport et al. 2015 | 7  | 42374402  | rs2108370  |               |                 |               |  | Associated with bacterial taxa from stool |
| Davenport et al. 2015 | 4  | 91720598  | rs2123959  | CCSER1        |                 |               |  | Associated with bacterial taxa from stool |
| Davenport et al. 2015 | 2  | 84524937  | rs2124177  |               |                 |               |  | Associated with bacterial taxa from stool |
| Davenport et al. 2015 | 11 | 15738775  | rs2141673  | RP11-396O20.2 |                 |               |  | Associated with bacterial taxa from stool |
| Davenport et al. 2015 | 9  | 27688029  | rs2150022  |               |                 |               |  | Associated with bacterial taxa from stool |
| Davenport et al. 2015 | 6  | 84695892  | rs215974   | RP4-676J13.2  |                 |               |  | Associated with bacterial taxa from stool |
| Davenport et al. 2015 | 2  | 56746396  | rs2162025  |               |                 |               |  | Associated with bacterial taxa from stool |
| Davenport et al. 2015 | 3  | 171419179 | rs2168205  | PLD1          |                 |               |  | Associated with bacterial taxa from stool |
| Davenport et al. 2015 | 14 | 83583841  | rs2225378  |               |                 |               |  | Associated with bacterial taxa from stool |
| Davenport et al. 2015 | 2  | 26357748  | rs2243834  | RAB10         |                 |               |  | Associated with bacterial taxa from stool |
| Davenport et al. 2015 | 11 | 19167850  | rs2271001  | ZDHC13        |                 |               |  | Associated with bacterial taxa from stool |
| Davenport et al. 2015 | 7  | 42023400  | rs2299148  | GLI3          |                 |               |  | Associated with bacterial taxa from stool |
| Davenport et al. 2015 | 17 | 10466474  | rs2320952  | CTC-297N7.11  |                 |               |  | Associated with bacterial taxa from stool |
| Davenport et al. 2015 | 2  | 84464227  | rs2364267  |               |                 |               |  | Associated with bacterial taxa from stool |
| Davenport et al. 2015 | 16 | 10750548  | rs2541522  | TEKT5         |                 |               |  | Associated with bacterial taxa from stool |
| Davenport et al. 2015 | 8  | 6303025   | rs2584     | MCPH1         |                 |               |  | Associated with bacterial taxa from stool |
| Davenport et al. 2015 | 3  | 21875126  | rs2630788  | ZNF385D       | AC023798.1      |               |  | Associated with bacterial taxa from stool |
| Davenport et al. 2015 | 3  | 120108004 | rs2702158  | FSTL1         | RP11-174O3.4    |               |  | Associated with bacterial taxa from stool |
| Davenport et al. 2015 | 3  | 120101527 | rs2702164  |               |                 |               |  | Associated with bacterial taxa from stool |
| Davenport et al. 2015 | 17 | 5582334   | rs2716882  |               |                 |               |  | Associated with bacterial taxa from stool |
| Davenport et al. 2015 | 1  | 209512897 | rs2843167  |               |                 |               |  | Associated with bacterial taxa from stool |
| Davenport et al. 2015 | 2  | 84431500  | rs2886029  |               |                 |               |  | Associated with bacterial taxa from stool |
| Davenport et al. 2015 | 8  | 117929674 | rs2921738  |               |                 |               |  | Associated with bacterial taxa from stool |
| Davenport et al. 2015 | 8  | 117929458 | rs2921739  |               |                 |               |  | Associated with bacterial taxa from stool |
| Davenport et al. 2015 | 6  | 167765251 | rs3010562  | TTL2          |                 |               |  | Associated with bacterial taxa from stool |
| Davenport et al. 2015 | 6  | 167765251 | rs3010562  | RP3-366N23.4  |                 |               |  | Associated with bacterial taxa from stool |
| Davenport et al. 2015 | 2  | 135483381 | rs3739034  |               |                 |               |  | Associated with bacterial taxa from stool |
| Davenport et al. 2015 | 2  | 135483534 | rs3739036  |               |                 |               |  | Associated with bacterial taxa from stool |
| Davenport et al. 2015 | 22 | 24717518  | rs3747113  | SPECC1L       | SPECC1L-ADORA2A |               |  | Associated with bacterial taxa from stool |
| Davenport et al. 2015 | 4  | 177438265 | rs374816   |               |                 |               |  | Associated with bacterial taxa from stool |
| Davenport et al. 2015 | 3  | 171380174 | rs3774039  | PLD1          |                 |               |  | Associated with bacterial taxa from stool |
| Davenport et al. 2015 | 6  | 87237249  | rs3846772  |               |                 |               |  | Associated with bacterial taxa from stool |
| Davenport et al. 2015 | 5  | 158544501 | rs41406347 | RP11-175K6.1  |                 |               |  | Associated with bacterial taxa from stool |
| Davenport et al. 2015 | 1  | 165394087 | rs41419946 | RXRG          |                 |               |  | Associated with bacterial taxa from stool |

|                       |    |           |           |               |               |  |                                           |
|-----------------------|----|-----------|-----------|---------------|---------------|--|-------------------------------------------|
| Davenport et al. 2015 | 1  | 216717338 | rs4147271 | ESRRG         |               |  | Associated with bacterial taxa from stool |
| Davenport et al. 2015 | 4  | 177439156 | rs443233  |               |               |  | Associated with bacterial taxa from stool |
| Davenport et al. 2015 | 6  | 129971544 | rs4479964 | ARHGAP18      |               |  | Associated with bacterial taxa from stool |
| Davenport et al. 2015 | 4  | 177438117 | rs448261  |               |               |  | Associated with bacterial taxa from stool |
| Davenport et al. 2015 | 2  | 18868188  | rs4614937 |               |               |  | Associated with bacterial taxa from stool |
| Davenport et al. 2015 | 2  | 129669656 | rs4662863 |               |               |  | Associated with bacterial taxa from stool |
| Davenport et al. 2015 | 2  | 26251361  | rs4665809 | AC013449.1    |               |  | Associated with bacterial taxa from stool |
| Davenport et al. 2015 | 2  | 26367503  | rs4665826 | SMARCE1P6     | AC011742.3    |  | Associated with bacterial taxa from stool |
| Davenport et al. 2015 | 3  | 10441147  | rs4684687 | ATP2B2        | MIR885        |  | Associated with bacterial taxa from stool |
| Davenport et al. 2015 | 8  | 17500223  | rs4705    | PDGFRL        | MTUS1         |  | Associated with bacterial taxa from stool |
| Davenport et al. 2015 | 7  | 42270322  | rs4724101 | GLI3          |               |  | Associated with bacterial taxa from stool |
| Davenport et al. 2015 | 8  | 106400667 | rs4734860 | ZFPM2         | RP11-127H5.1  |  | Associated with bacterial taxa from stool |
| Davenport et al. 2015 | 8  | 59132711  | rs4737490 |               |               |  | Associated with bacterial taxa from stool |
| Davenport et al. 2015 | 18 | 40418431  | rs473976  | RIT2          |               |  | Associated with bacterial taxa from stool |
| Davenport et al. 2015 | 9  | 5881364   | rs4740829 | KIAA2026      |               |  | Associated with bacterial taxa from stool |
| Davenport et al. 2015 | 15 | 92814603  | rs4777900 | RP11-152L20.3 |               |  | Associated with bacterial taxa from stool |
| Davenport et al. 2015 | 9  | 27664432  | rs4879677 |               |               |  | Associated with bacterial taxa from stool |
| Davenport et al. 2015 | 10 | 1705508   | rs4880904 | ADARB2        |               |  | Associated with bacterial taxa from stool |
| Davenport et al. 2015 | 3  | 171369776 | rs4894707 | PLD1          |               |  | Associated with bacterial taxa from stool |
| Davenport et al. 2015 | 14 | 78028378  | rs4903604 | SPTLC2        |               |  | Associated with bacterial taxa from stool |
| Davenport et al. 2015 | 5  | 158545464 | rs4921164 | RP11-175K6.1  |               |  | Associated with bacterial taxa from stool |
| Davenport et al. 2015 | 5  | 2015330   | rs4975794 |               |               |  | Associated with bacterial taxa from stool |
| Davenport et al. 2015 | 2  | 25730439  | rs517403  | DTNB          |               |  | Associated with bacterial taxa from stool |
| Davenport et al. 2015 | 20 | 17297511  | rs6080636 | PCSK2         |               |  | Associated with bacterial taxa from stool |
| Davenport et al. 2015 | 20 | 11393882  | rs6108958 |               |               |  | Associated with bacterial taxa from stool |
| Davenport et al. 2015 | 20 | 17304195  | rs6111497 | PCSK2         |               |  | Associated with bacterial taxa from stool |
| Davenport et al. 2015 | 2  | 25754670  | rs636586  | DTNB          |               |  | Associated with bacterial taxa from stool |
| Davenport et al. 2015 | 1  | 246853200 | rs6413860 | RP11-439E19.7 | RP11-439E19.9 |  | Associated with bacterial taxa from stool |
| Davenport et al. 2015 | 7  | 42281481  | rs6463094 | GLI3          |               |  | Associated with bacterial taxa from stool |
| Davenport et al. 2015 | 7  | 42287633  | rs6463097 |               |               |  | Associated with bacterial taxa from stool |
| Davenport et al. 2015 | 8  | 106401296 | rs6469000 | ZFPM2         | RP11-127H5.1  |  | Associated with bacterial taxa from stool |
| Davenport et al. 2015 | 2  | 20338020  | rs6531212 |               |               |  | Associated with bacterial taxa from stool |
| Davenport et al. 2015 | 1  | 218965463 | rs6541219 |               |               |  | Associated with bacterial taxa from stool |
| Davenport et al. 2015 | 2  | 25845467  | rs6546314 | DTNB          |               |  | Associated with bacterial taxa from stool |
| Davenport et al. 2015 | 2  | 84477813  | rs6547544 |               |               |  | Associated with bacterial taxa from stool |
| Davenport et al. 2015 | 2  | 84486725  | rs6547547 |               |               |  | Associated with bacterial taxa from stool |
| Davenport et al. 2015 | 1  | 216722850 | rs6604635 | ESRRG         |               |  | Associated with bacterial taxa from stool |
| Davenport et al. 2015 | 1  | 218958105 | rs6683441 |               |               |  | Associated with bacterial taxa from stool |
| Davenport et al. 2015 | 2  | 230210521 | rs6717477 |               |               |  | Associated with bacterial taxa from stool |
| Davenport et al. 2015 | 2  | 26342537  | rs6742226 | RAB10         |               |  | Associated with bacterial taxa from stool |
| Davenport et al. 2015 | 2  | 25659244  | rs6746082 | DTNB          |               |  | Associated with bacterial taxa from stool |
| Davenport et al. 2015 | 2  | 135469769 | rs6747870 | TMEM163       |               |  | Associated with bacterial taxa from stool |
| Davenport et al. 2015 | 2  | 17834452  | rs6751113 | VSNL1         |               |  | Associated with bacterial taxa from stool |
| Davenport et al. 2015 | 2  | 84477956  | rs6761743 |               |               |  | Associated with bacterial taxa from stool |
| Davenport et al. 2015 | 3  | 171321314 | rs6781853 | PLD1          |               |  | Associated with bacterial taxa from stool |
| Davenport et al. 2015 | 5  | 2015103   | rs6867032 |               |               |  | Associated with bacterial taxa from stool |
| Davenport et al. 2015 | 6  | 87248703  | rs6903888 |               |               |  | Associated with bacterial taxa from stool |
| Davenport et al. 2015 | 6  | 124246347 | rs6907236 | NKAIN2        |               |  | Associated with bacterial taxa from stool |
| Davenport et al. 2015 | 6  | 87248657  | rs6926527 |               |               |  | Associated with bacterial taxa from stool |
| Davenport et al. 2015 | 8  | 106397116 | rs6999452 | ZFPM2         | RP11-127H5.1  |  | Associated with bacterial taxa from stool |
| Davenport et al. 2015 | 12 | 23494704  | rs7134941 |               |               |  | Associated with bacterial taxa from stool |
| Davenport et al. 2015 | 14 | 104912876 | rs7150255 | CEND1P1       |               |  | Associated with bacterial taxa from stool |
| Davenport et al. 2015 | 12 | 46085330  | rs7299538 |               |               |  | Associated with bacterial taxa from stool |
| Davenport et al. 2015 | 13 | 20637140  | rs7324021 | ZMYM2         |               |  | Associated with bacterial taxa from stool |
| Davenport et al. 2015 | 8  | 17522582  | rs7464566 | MTUS1         |               |  | Associated with bacterial taxa from stool |
| Davenport et al. 2015 | 5  | 152516889 | rs753768  | AC091969.1    |               |  | Associated with bacterial taxa from stool |
| Davenport et al. 2015 | 2  | 230209037 | rs7563766 |               |               |  | Associated with bacterial taxa from stool |
| Davenport et al. 2015 | 2  | 56759264  | rs7580218 |               |               |  | Associated with bacterial taxa from stool |
| Davenport et al. 2015 | 17 | 10504591  | rs758139  | CTC-297N7.7   |               |  | Associated with bacterial taxa from stool |
| Davenport et al. 2015 | 17 | 10504591  | rs758139  | CTC-297N7.11  |               |  | Associated with bacterial taxa from stool |
| Davenport et al. 2015 | 2  | 26279810  | rs7599132 | RAB10         |               |  | Associated with bacterial taxa from stool |
| Davenport et al. 2015 | 2  | 84486944  | rs7604649 |               |               |  | Associated with bacterial taxa from stool |
| Davenport et al. 2015 | 2  | 56741751  | rs7605943 |               |               |  | Associated with bacterial taxa from stool |
| Davenport et al. 2015 | 2  | 25843252  | rs764956  | DTNB          |               |  | Associated with bacterial taxa from stool |
| Davenport et al. 2015 | 4  | 92431609  | rs7677760 | CCSER1        |               |  | Associated with bacterial taxa from stool |

|                       |    |                     |            |               |         |                                                                  |
|-----------------------|----|---------------------|------------|---------------|---------|------------------------------------------------------------------|
| Davenport et al. 2015 | 4  | 81378966            | rs7683819  | C4orf22       |         | Associated with bacterial taxa from stool                        |
| Davenport et al. 2015 | 6  | 124245836           | rs7744763  | NKAIN2        |         | Associated with bacterial taxa from stool                        |
| Davenport et al. 2015 | 9  | 21667762            | rs7868228  |               |         | Associated with bacterial taxa from stool                        |
| Davenport et al. 2015 | 10 | 95072536            | rs787665   | MYOF          |         | Associated with bacterial taxa from stool                        |
| Davenport et al. 2015 | 11 | 15685570            | rs7943358  | RP11-396O20.1 |         | Associated with bacterial taxa from stool                        |
| Davenport et al. 2015 | 12 | 23485126            | rs7955257  |               |         | Associated with bacterial taxa from stool                        |
| Davenport et al. 2015 | 14 | 104838403           | rs8020729  | RP11-260M19.1 |         | Associated with bacterial taxa from stool                        |
| Davenport et al. 2015 | 15 | 33464534            | rs8037033  | FMN1          |         | Associated with bacterial taxa from stool                        |
| Davenport et al. 2015 | 16 | 82787053            | rs8056064  | CDH13         |         | Associated with bacterial taxa from stool                        |
| Davenport et al. 2015 | 16 | 82627952            | rs8063330  |               |         | Associated with bacterial taxa from stool                        |
| Davenport et al. 2015 | 2  | 170156880           | rs830964   | LRP2          |         | Associated with bacterial taxa from stool                        |
| Davenport et al. 2015 | 11 | 126310082           | rs878830   | ST3GAL4       | KIRREL3 | Associated with bacterial taxa from stool                        |
| Davenport et al. 2015 | 2  | 56734035            | rs890100   |               |         | Associated with bacterial taxa from stool                        |
| Davenport et al. 2015 | 16 | 82628494            | rs892244   |               |         | Associated with bacterial taxa from stool                        |
| Davenport et al. 2015 | 12 | 118146742           | rs895470   | KSR2          |         | Associated with bacterial taxa from stool                        |
| Davenport et al. 2015 | 1  | 209527925           | rs906351   |               |         | Associated with bacterial taxa from stool                        |
| Davenport et al. 2015 | 1  | 101749974           | rs910633   |               |         | Associated with bacterial taxa from stool                        |
| Davenport et al. 2015 | 4  | 177433597           | rs921312   |               |         | Associated with bacterial taxa from stool                        |
| Davenport et al. 2015 | 2  | 230214951           | rs9288646  |               |         | Associated with bacterial taxa from stool                        |
| Davenport et al. 2015 | 2  | 25755848            | rs936012   | DTNB          |         | Associated with bacterial taxa from stool                        |
| Davenport et al. 2015 | 6  | 68029041            | rs9363741  |               |         | Associated with bacterial taxa from stool                        |
| Davenport et al. 2015 | 6  | 124250159           | rs9401713  | NKAIN2        |         | Associated with bacterial taxa from stool                        |
| Davenport et al. 2015 | 1  | 218969908           | rs9431487  |               |         | Associated with bacterial taxa from stool                        |
| Davenport et al. 2015 | 1  | 101745077           | rs9434166  |               |         | Associated with bacterial taxa from stool                        |
| Davenport et al. 2015 | 1  | 101750747           | rs9434172  |               |         | Associated with bacterial taxa from stool                        |
| Davenport et al. 2015 | 5  | 125018357           | rs963445   |               |         | Associated with bacterial taxa from stool                        |
| Davenport et al. 2015 | 3  | 171320227           | rs9822322  | PLD1          |         | Associated with bacterial taxa from stool                        |
| Davenport et al. 2015 | 3  | 116356010           | rs9847048  | LSAMP         |         | Associated with bacterial taxa from stool                        |
| Davenport et al. 2015 | 7  | 42217027            | rs9886211  | GLI3          |         | Associated with bacterial taxa from stool                        |
| Davenport et al. 2015 | 6  | 124245340           | rs991795   | NKAIN2        |         | Associated with bacterial taxa from stool                        |
| Davenport et al. 2015 | 8  | 59110041            | rs992900   | FAM110B       |         | Associated with bacterial taxa from stool                        |
| Blekhman et al. 2015  | 2  | 24290671            | rs61742149 | SF3B14        |         | Associated with bacterial taxa from Anterior nares               |
| Blekhman et al. 2015  | 10 | 129921195           | rs1063536  | MKI67         |         | Associated with bacterial taxa from Anterior nares               |
| Blekhman et al. 2015  | 14 | 93276654            | rs1040835  | GOLGA5        |         | Associated with bacterial taxa from Anterior nares               |
| Blekhman et al. 2015  | 16 | 84522897            | rs436278   | KIAA1609      |         | Associated with bacterial taxa from Anterior nares               |
| Blekhman et al. 2015  | 13 | 78216873            | rs1053985  | SCEL          |         | Associated with bacterial taxa from Anterior nares               |
| Blekhman et al. 2015  | 2  | 186625770-186671912 | NA         | FSIP2         |         | Associated with bacterial taxa from Anterior nares               |
| Blekhman et al. 2015  | 6  | 80741243            | rs1801465  | TTK           |         | Associated with bacterial taxa from Attached Keratinized gingiva |
| Blekhman et al. 2015  | 17 | 67125840            | rs4968839  | ABCA6         |         | Associated with bacterial taxa from Attached Keratinized gingiva |
| Blekhman et al. 2015  | 17 | 67212031            | rs11077414 | ABCA10        |         | Associated with bacterial taxa from Attached Keratinized gingiva |
| Blekhman et al. 2015  | 3  | 174814920           | rs9836841  | NAALADL2      |         | Associated with bacterial taxa from Attached Keratinized gingiva |
| Blekhman et al. 2015  | 10 | 125528048           | rs1219725  | CPXM2         |         | Associated with bacterial taxa from Attached Keratinized gingiva |
| Blekhman et al. 2015  | 9  | 104309445           | rs2273976  | RNF20         |         | Associated with bacterial taxa from Attached Keratinized gingiva |
| Blekhman et al. 2015  | 16 | 81398635            | rs2608555  | GAN           |         | Associated with bacterial taxa from Attached Keratinized gingiva |
| Blekhman et al. 2015  | 2  | 228230945           | NA         | TM4SF20       |         | Associated with bacterial taxa from Attached Keratinized gingiva |
| Blekhman et al. 2015  | 7  | 47840387            | rs13231277 | PKD1L1        |         | Associated with bacterial taxa from Attached Keratinized gingiva |
| Blekhman et al. 2015  | 1  | 159824967           | rs2501340  | C1orf204      |         | Associated with bacterial taxa from Attached Keratinized gingiva |
| Blekhman et al. 2015  | 3  | 128344786           | rs1126828  | RPN1          |         | Associated with bacterial taxa from Attached Keratinized gingiva |
| Blekhman et al. 2015  | 22 | 30689998            | rs11089442 | TBC1D10A      |         | Associated with bacterial taxa from Buccal mucosa                |
| Blekhman et al. 2015  | 11 | 87013438            | rs2276102  | TMEM135       |         | Associated with bacterial taxa from Buccal mucosa                |
| Blekhman et al. 2015  | 17 | 76157266            | rs4071641  | C17orf99      |         | Associated with bacterial taxa from Buccal mucosa                |
| Blekhman et al. 2015  | 3  | 183211906           | rs1520101  | KLHL6         |         | Associated with bacterial taxa from Buccal mucosa                |
| Blekhman et al. 2015  | 4  | 40337523            | rs56241474 | CHRNA9        |         | Associated with bacterial taxa from Buccal mucosa                |
| Blekhman et al. 2015  | 16 | 842450              | rs2277897  | CHTF18        |         | Associated with bacterial taxa from Hard palate                  |
| Blekhman et al. 2015  | 19 | 10794630            | rs2229383  | ILF3          |         | Associated with bacterial taxa from Hard palate                  |
| Blekhman et al. 2015  | 4  | 41673604            | rs11734372 | LIMCH1        |         | Associated with bacterial taxa from Hard palate                  |
| Blekhman et al. 2015  | 1  | 92457843            | rs10747493 | BRDT          |         | Associated with bacterial taxa from Left Antecubital fossa       |
| Blekhman et al. 2015  | 9  | 38615698            | rs1832313  | ANKRD18A      |         | Associated with bacterial taxa from Left Antecubital fossa       |
| Blekhman et al. 2015  | 15 | 100514614           | rs2573652  | ADAMTS17      |         | Associated with bacterial taxa from Left Antecubital fossa       |
| Blekhman et al. 2015  | 14 | 88693725            | rs2277524  | KCNK10        |         | Associated with bacterial taxa from Left Antecubital fossa       |
| Blekhman et al. 2015  | 2  | 163208893           | rs17783344 | GCA           |         | Associated with bacterial taxa from Left Antecubital fossa       |
| Blekhman et al. 2015  | 9  | 33442952            | rs2228332  | AQP3          |         | Associated with bacterial taxa from Left Retroauricular crease   |
| Blekhman et al. 2015  | 1  | 111862074           | rs2820092  | CHIA          |         | Associated with bacterial taxa from Left Retroauricular crease   |

|                      |    |                   |                     |           |           |                                                                 |
|----------------------|----|-------------------|---------------------|-----------|-----------|-----------------------------------------------------------------|
| Blekhman et al. 2015 | 12 | 10782115-10783729 | rs3759259-rs2290717 | STYK1     |           | Associated with bacterial taxa from Left Retroauricular crease  |
| Blekhman et al. 2015 | 10 | 134017295         | rs12313             | DPYSL4    |           | Associated with bacterial taxa from Left Retroauricular crease  |
| Blekhman et al. 2015 | 17 | 78073355          | rs56407805          | CCDC40    |           | Associated with bacterial taxa from Palatine Tonsils            |
| Blekhman et al. 2015 | 1  | 169512027         | rs6021              | F5        |           | Associated with bacterial taxa from Palatine Tonsils            |
| Blekhman et al. 2015 | 4  | 155241572         | rs11935573          | DCHS2     |           | Associated with bacterial taxa from Palatine Tonsils            |
| Blekhman et al. 2015 | 6  | 34831866          | rs3734264           | UHRF1BP1  |           | Associated with bacterial taxa from Right Retroauricular crease |
| Blekhman et al. 2015 | 1  | 223116240         | rs61746477          | DISP1     |           | Associated with bacterial taxa from Right Retroauricular crease |
| Blekhman et al. 2015 | 17 | 40714804          | rs615942            | COASY     |           | Associated with bacterial taxa from Saliva                      |
| Blekhman et al. 2015 | 10 | 64927823          | rs1935              | JMJD1C    |           | Associated with bacterial taxa from Saliva                      |
| Blekhman et al. 2015 | 15 | 43632549          | rs2278857           | ADAL      |           | Associated with bacterial taxa from Saliva                      |
| Blekhman et al. 2015 | 15 | 43661802          | rs3809482           | ZSCAN29   |           | Associated with bacterial taxa from Saliva                      |
| Blekhman et al. 2015 | 15 | 43748304          | rs690367            | TP53BP1   |           | Associated with bacterial taxa from Saliva                      |
| Blekhman et al. 2015 | 2  | 136511817         | rs1050115           | UBXN4     |           | Associated with bacterial taxa from Stool                       |
| Blekhman et al. 2015 | 2  | 136561557         | rs2304371           | LCT       |           | Associated with bacterial taxa from Stool                       |
| Blekhman et al. 2015 | 2  | 136590746         | rs3754689           | LCT       |           | Associated with bacterial taxa from Stool                       |
| Blekhman et al. 2015 | 3  | 129297223         | rs1110168           | PLXND1    |           | Associated with bacterial taxa from Stool                       |
| Blekhman et al. 2015 | 11 | 57982620          | rs1966834           | OR1S1     |           | Associated with bacterial taxa from Stool                       |
| Blekhman et al. 2015 | 14 | 55907172          | rs8019270           | TBPL2     |           | Associated with bacterial taxa from Stool                       |
| Blekhman et al. 2015 | 20 | 2816821           | rs2274669           | FAM113A   |           | Associated with bacterial taxa from Stool                       |
| Blekhman et al. 2015 | 7  | 37961001          | rs10248138          | EPDR1     |           | Associated with bacterial taxa from Stool                       |
| Blekhman et al. 2015 | 10 | 73111408          | rs780668            | SLC29A3   |           | Associated with bacterial taxa from Subgingival plaque          |
| Blekhman et al. 2015 | 2  | 216300482         | rs1250259           | FN1       |           | Associated with bacterial taxa from Subgingival plaque          |
| Blekhman et al. 2015 | 5  | 41049389          | rs325863            | HEATR7B2  |           | Associated with bacterial taxa from Subgingival plaque          |
| Blekhman et al. 2015 | 5  | 41049397          | rs325864            | HEATR7B2  |           | Associated with bacterial taxa from Subgingival plaque          |
| Blekhman et al. 2015 | 15 | 100821576         | rs7496668           | ADAMTS17  |           | Associated with bacterial taxa from Supragingival plaque        |
| Blekhman et al. 2015 | 5  | 150696447         | rs369907            | SLC36A2   |           | Associated with bacterial taxa from Supragingival plaque        |
| Blekhman et al. 2015 | 10 | 96954360          | rs11188225          | C10orf129 |           | Associated with bacterial taxa from Supragingival plaque        |
| Blekhman et al. 2015 | 11 | 124096247         | rs2466613           | OR8G2     |           | Associated with bacterial taxa from Supragingival plaque        |
| Blekhman et al. 2015 | 3  | 52556890          | rs4434138           | STAB1     |           | Associated with bacterial taxa from Supragingival plaque        |
| Blekhman et al. 2015 | 3  | 52558133          | rs13621             | STAB1     |           | Associated with bacterial taxa from Supragingival plaque        |
| Blekhman et al. 2015 | 3  | 52584787          | rs2251219           | PBRM1     |           | Associated with bacterial taxa from Supragingival plaque        |
| Blekhman et al. 2015 | 3  | 52820981          | rs678               | ITIH1     |           | Associated with bacterial taxa from Supragingival plaque        |
| Blekhman et al. 2015 | 3  | 52821011          | rs1042779           | ITIH1     |           | Associated with bacterial taxa from Supragingival plaque        |
| Blekhman et al. 2015 | 1  | 231906589         | rs2492367           | DISC1     |           | Associated with bacterial taxa from Supragingival plaque        |
| Blekhman et al. 2015 | 5  | 6600150           | rs3822434           | NSUN2     |           | Associated with bacterial taxa from Supragingival plaque        |
| Blekhman et al. 2015 | 5  | 150696447         | rs369907            | SLC36A2   |           | Associated with bacterial taxa from Supragingival plaque        |
| Blekhman et al. 2015 | 8  | 21956108          | rs35497596          | FAM160B2  |           | Associated with bacterial taxa from Supragingival plaque        |
| Blekhman et al. 2015 | 11 | 124096247         | rs2466613           | OR8G2     |           | Associated with bacterial taxa from Supragingival plaque        |
| Blekhman et al. 2015 | 3  | 52556890          | rs4434138           | STAB1     |           | Associated with bacterial taxa from Supragingival plaque        |
| Blekhman et al. 2015 | 3  | 52558133          | rs13621             | STAB1     |           | Associated with bacterial taxa from Supragingival plaque        |
| Blekhman et al. 2015 | 11 | 64081445          | rs2276014           | ESRRA     |           | Associated with bacterial taxa from Supragingival plaque        |
| Blekhman et al. 2015 | 4  | 121957559         | rs34766411          | NDNF      |           | Associated with bacterial taxa from Throat                      |
| Blekhman et al. 2015 | 6  | 32410987          | rs3135391           | HLA-DRA   |           | Associated with bacterial taxa from Throat                      |
| Blekhman et al. 2015 | 10 | 11805354          | rs12258196          | ECHDC3    |           | Associated with bacterial taxa from Throat                      |
| Blekhman et al. 2015 | 10 | 11805357          | rs10906011          | ECHDC3    |           | Associated with bacterial taxa from Throat                      |
| Blekhman et al. 2015 | 7  | 149474393         | rs709061            | SSPO      |           | Associated with bacterial taxa from Tongue dorsum               |
| Blekhman et al. 2015 | 12 | 1893170           | rs9805042           | ADIPOR2   |           | Associated with bacterial taxa from Tongue dorsum               |
| Blekhman et al. 2015 | 4  | 38799710          | rs4833095           | TLR1      |           | Associated with bacterial taxa from Tongue dorsum               |
| Blekhman et al. 2015 | 12 | 661656            | rs7298766           | B4GALNT3  |           | Associated with bacterial taxa from Tongue dorsum               |
| Blekhman et al. 2015 | 6  | 168709385         | rs6925614           | DACT2     |           | Associated with bacterial taxa from Tongue dorsum               |
| Goodrich et al. 2016 | 7  | 113115671         | rs10233359          |           |           | Associated with bacterial taxa from stool                       |
| Goodrich et al. 2016 | 18 | 37336088          | rs12607607          | KC6       |           | Associated with bacterial taxa from stool                       |
| Goodrich et al. 2016 | 1  | 106479033         | rs1376236           |           |           | Associated with bacterial taxa from stool                       |
| Goodrich et al. 2016 | 5  | 60471107          | rs159373            | NDUFAF2   |           | Associated with bacterial taxa from stool                       |
| Goodrich et al. 2016 | 5  | 168362905         | rs10055309          | SLIT3     | LOC728095 | Associated with bacterial taxa from stool                       |
| Goodrich et al. 2016 | 1  | 65939087          | rs7524581           |           |           | Associated with bacterial taxa from stool                       |
| Goodrich et al. 2016 | 4  | 31242627          | rs11733214          |           |           | Associated with bacterial taxa from stool                       |
| Goodrich et al. 2016 | 2  | 196967488         | rs7587067           | HECW2     |           | Associated with bacterial taxa from stool                       |
| Goodrich et al. 2016 | 15 | 61981226          | rs730589            | DAPK2     |           | Associated with bacterial taxa from stool                       |
| Goodrich et al. 2016 | 14 | 21071787          | rs2293702           | SALL2     | SALL2     | Associated with bacterial taxa from stool                       |
| Goodrich et al. 2016 | 3  | 184585954         | rs2136233           | MCF2L2    |           | Associated with bacterial taxa from stool                       |
| Goodrich et al. 2016 | 12 | 90550513          | rs7486170           |           |           | Associated with bacterial taxa from stool                       |
| Goodrich et al. 2016 | 14 | 56212663          | rs4901725           |           |           | Associated with bacterial taxa from stool                       |
| Goodrich et al. 2016 | 15 | 91943634          | rs4777927           |           |           | Associated with bacterial taxa from stool                       |

|                      |    |           |            |            |         |                                           |
|----------------------|----|-----------|------------|------------|---------|-------------------------------------------|
| Goodrich et al. 2016 | 3  | 123411977 | rs12489943 | CASR       |         | Associated with bacterial taxa from stool |
| Goodrich et al. 2016 | 4  | 36791724  | rs1346183  |            |         | Associated with bacterial taxa from stool |
| Goodrich et al. 2016 | 12 | 43256559  | rs7134690  | NELL2      |         | Associated with bacterial taxa from stool |
| Goodrich et al. 2016 | 6  | 68549551  | rs7749517  |            |         | Associated with bacterial taxa from stool |
| Goodrich et al. 2016 | 12 | 90574334  | rs11831423 |            |         | Associated with bacterial taxa from stool |
| Goodrich et al. 2016 | 14 | 23026012  | rs10148020 | NGDN       |         | Associated with bacterial taxa from stool |
| Goodrich et al. 2016 | 6  | 155305663 | rs9397756  |            |         | Associated with bacterial taxa from stool |
| Goodrich et al. 2016 | 1  | 106478896 | rs1376235  |            |         | Associated with bacterial taxa from stool |
| Goodrich et al. 2016 | 3  | 113159007 | rs493456   | PHLDB2     |         | Associated with bacterial taxa from stool |
| Goodrich et al. 2016 | 5  | 78519816  | rs2166343  |            |         | Associated with bacterial taxa from stool |
| Goodrich et al. 2016 | 5  | 78519816  | rs2166343  |            |         | Associated with bacterial taxa from stool |
| Goodrich et al. 2016 | 19 | 17903945  | rs11880147 | CCDC124    | CCDC124 | Associated with bacterial taxa from stool |
| Goodrich et al. 2016 | 15 | 91943634  | rs4777927  |            |         | Associated with bacterial taxa from stool |
| Goodrich et al. 2016 | 1  | 186725611 | rs6656158  |            |         | Associated with bacterial taxa from stool |
| Goodrich et al. 2016 | 10 | 121593671 | rs2475321  | MCMBP      |         | Associated with bacterial taxa from stool |
| Goodrich et al. 2016 | 5  | 63241282  | rs7732898  |            |         | Associated with bacterial taxa from stool |
| Goodrich et al. 2016 | 11 | 94664580  | rs498018   |            |         | Associated with bacterial taxa from stool |
| Goodrich et al. 2016 | 5  | 78519816  | rs2166343  |            |         | Associated with bacterial taxa from stool |
| Goodrich et al. 2016 | 4  | 36791724  | rs1346183  |            |         | Associated with bacterial taxa from stool |
| Goodrich et al. 2016 | 15 | 30964718  | rs347941   | FMN1       |         | Associated with bacterial taxa from stool |
| Goodrich et al. 2016 | 18 | 64200381  | rs17079032 |            |         | Associated with bacterial taxa from stool |
| Goodrich et al. 2016 | 9  | 14427476  | rs508259   |            |         | Associated with bacterial taxa from stool |
| Goodrich et al. 2016 | 5  | 78519816  | rs2166343  |            |         | Associated with bacterial taxa from stool |
| Goodrich et al. 2016 | 6  | 30760851  | rs2269706  | PPP1R18    | NRM     | Associated with bacterial taxa from stool |
| Goodrich et al. 2016 | 7  | 155704640 | rs4717021  |            |         | Associated with bacterial taxa from stool |
| Goodrich et al. 2016 | 16 | 10368339  | rs7499858  |            |         | Associated with bacterial taxa from stool |
| Goodrich et al. 2016 | 2  | 136123949 | rs1446585  | R3HDM1     |         | Associated with bacterial taxa from stool |
| Goodrich et al. 2016 | 6  | 156712530 | rs9397927  |            |         | Associated with bacterial taxa from stool |
| Goodrich et al. 2016 | 11 | 20900570  | rs16907036 | NELL1      |         | Associated with bacterial taxa from stool |
| Goodrich et al. 2016 | 2  | 95319407  | rs2278067  | PROM2      | KCNIP3  | Associated with bacterial taxa from stool |
| Goodrich et al. 2016 | 17 | 29846491  | rs9889895  |            |         | Associated with bacterial taxa from stool |
| Goodrich et al. 2016 | 2  | 136123949 | rs1446585  | R3HDM1     |         | Associated with bacterial taxa from stool |
| Goodrich et al. 2016 | 2  | 136123949 | rs1446585  | R3HDM1     |         | Associated with bacterial taxa from stool |
| Goodrich et al. 2016 | 13 | 73956482  | rs4883972  |            |         | Associated with bacterial taxa from stool |
| Goodrich et al. 2016 | 13 | 73956482  | rs4883972  |            |         | Associated with bacterial taxa from stool |
| Goodrich et al. 2016 | 13 | 73956482  | rs4883972  |            |         | Associated with bacterial taxa from stool |
| Goodrich et al. 2016 | 2  | 136123949 | rs1446585  | R3HDM1     |         | Associated with bacterial taxa from stool |
| Goodrich et al. 2016 | 13 | 67055507  | rs9599240  |            |         | Associated with bacterial taxa from stool |
| Goodrich et al. 2016 | 1  | 188889256 | rs687746   | LOC440704  |         | Associated with bacterial taxa from stool |
| Goodrich et al. 2016 | 4  | 101319681 | rs2866194  | DDIT4L     |         | Associated with bacterial taxa from stool |
| Goodrich et al. 2016 | 11 | 55254428  | rs12577205 |            |         | Associated with bacterial taxa from stool |
| Goodrich et al. 2016 | 16 | 54023045  | rs1420227  |            |         | Associated with bacterial taxa from stool |
| Goodrich et al. 2016 | 7  | 93722673  | rs10242192 |            |         | Associated with bacterial taxa from stool |
| Goodrich et al. 2016 | 13 | 65258156  | rs10507725 |            |         | Associated with bacterial taxa from stool |
| Goodrich et al. 2016 | 4  | 36791724  | rs1346183  |            |         | Associated with bacterial taxa from stool |
| Goodrich et al. 2016 | 2  | 130041583 | rs2704557  |            |         | Associated with bacterial taxa from stool |
| Goodrich et al. 2016 | 10 | 116396380 | rs12776647 | ABLIM1     |         | Associated with bacterial taxa from stool |
| Goodrich et al. 2016 | 2  | 109108739 | rs6542797  | SH3RF3-AS1 | SH3RF3  | Associated with bacterial taxa from stool |
| Goodrich et al. 2016 | 18 | 41570268  | rs692899   | SLC14A1    |         | Associated with bacterial taxa from stool |
| Goodrich et al. 2016 | 18 | 37353216  | rs12606140 | KC6        |         | Associated with bacterial taxa from stool |
| Goodrich et al. 2016 | 7  | 82335279  | rs4628206  | PCLO       |         | Associated with bacterial taxa from stool |
| Goodrich et al. 2016 | 19 | 42132203  | rs17242235 | ZNF568     |         | Associated with bacterial taxa from stool |
| Goodrich et al. 2016 | 12 | 90574334  | rs11831423 |            |         | Associated with bacterial taxa from stool |
| Goodrich et al. 2016 | 15 | 91943634  | rs4777927  |            |         | Associated with bacterial taxa from stool |
| Goodrich et al. 2016 | 7  | 147292289 | rs10229688 | MIR548T    | CNTNAP2 | Associated with bacterial taxa from stool |
| Goodrich et al. 2016 | 7  | 89658740  | rs17862118 | STEAP2-AS1 |         | Associated with bacterial taxa from stool |
| Goodrich et al. 2016 | 11 | 96326159  | rs502656   |            |         | Associated with bacterial taxa from stool |
| Goodrich et al. 2016 | 3  | 18166933  | rs13067391 | LOC339862  |         | Associated with bacterial taxa from stool |
| Goodrich et al. 2016 | 1  | 90432029  | rs4342835  |            |         | Associated with bacterial taxa from stool |
| Goodrich et al. 2016 | 6  | 131352801 | rs7761311  | EPB41L2    |         | Associated with bacterial taxa from stool |
| Goodrich et al. 2016 | 6  | 68541538  | rs13214269 |            |         | Associated with bacterial taxa from stool |
| Goodrich et al. 2016 | 11 | 12508420  | rs7644     | PARVA      |         | Associated with bacterial taxa from stool |
| Goodrich et al. 2016 | 1  | 151467432 | rs737301   | PRR9       |         | Associated with bacterial taxa from stool |
| Goodrich et al. 2016 | 9  | 114270048 | rs10114968 | HSDL2      |         | Associated with bacterial taxa from stool |
| Goodrich et al. 2016 | 18 | 41663873  | rs495078   | SIGLEC15   |         | Associated with bacterial taxa from stool |

|                      |    |           |            |           |        |                                           |
|----------------------|----|-----------|------------|-----------|--------|-------------------------------------------|
| Goodrich et al. 2016 | 15 | 92699262  | rs16948999 | MCTP2     | MCTP2  | Associated with bacterial taxa from stool |
| Goodrich et al. 2016 | 11 | 83679509  | rs7106602  | DLG2      |        | Associated with bacterial taxa from stool |
| Goodrich et al. 2016 | 15 | 87053016  | rs11073804 |           |        | Associated with bacterial taxa from stool |
| Goodrich et al. 2016 | 12 | 11988388  | rs7979513  |           |        | Associated with bacterial taxa from stool |
| Goodrich et al. 2016 | 5  | 78457715  | rs3733890  | BHMT      |        | Associated with bacterial taxa from stool |
| Goodrich et al. 2016 | 11 | 65142782  | rs1193851  | MAP3K11   | PCNXL3 | Associated with bacterial taxa from stool |
| Goodrich et al. 2016 | 17 | 49066516  | rs3105827  |           |        | Associated with bacterial taxa from stool |
| Goodrich et al. 2016 | 16 | 54029584  | rs17299191 |           |        | Associated with bacterial taxa from stool |
| Goodrich et al. 2016 | 2  | 57679532  | rs11125721 |           |        | Associated with bacterial taxa from stool |
| Goodrich et al. 2016 | 6  | 67253530  | rs6914260  |           |        | Associated with bacterial taxa from stool |
| Goodrich et al. 2016 | 9  | 26748979  | rs11792081 |           |        | Associated with bacterial taxa from stool |
| Goodrich et al. 2016 | 2  | 28056798  | rs898031   | BRE       |        | Associated with bacterial taxa from stool |
| Goodrich et al. 2016 | 6  | 132608771 | rs9321334  |           |        | Associated with bacterial taxa from stool |
| Goodrich et al. 2016 | 5  | 97277190  | rs3909540  |           |        | Associated with bacterial taxa from stool |
| Goodrich et al. 2016 | 5  | 78457715  | rs3733890  | BHMT      |        | Associated with bacterial taxa from stool |
| Goodrich et al. 2016 | 3  | 172792314 | rs360402   | PLD1      |        | Associated with bacterial taxa from stool |
| Goodrich et al. 2016 | 6  | 122454421 | rs2198863  |           |        | Associated with bacterial taxa from stool |
| Goodrich et al. 2016 | 14 | 59834998  | rs2273623  | PPM1A     | PPM1A  | Associated with bacterial taxa from stool |
| Goodrich et al. 2016 | 17 | 11605759  | rs12936861 | DNAH9     |        | Associated with bacterial taxa from stool |
| Goodrich et al. 2016 | 14 | 91945539  | rs11845652 | SLC24A4   |        | Associated with bacterial taxa from stool |
| Goodrich et al. 2016 | 12 | 101693527 | rs12311520 |           |        | Associated with bacterial taxa from stool |
| Goodrich et al. 2016 | 12 | 101693527 | rs12311520 |           |        | Associated with bacterial taxa from stool |
| Goodrich et al. 2016 | 12 | 101693527 | rs12311520 |           |        | Associated with bacterial taxa from stool |
| Goodrich et al. 2016 | 12 | 101693527 | rs12311520 |           |        | Associated with bacterial taxa from stool |
| Goodrich et al. 2016 | 15 | 91943634  | rs4777927  |           |        | Associated with bacterial taxa from stool |
| Goodrich et al. 2016 | 7  | 123633020 | rs6466898  |           |        | Associated with bacterial taxa from stool |
| Goodrich et al. 2016 | 13 | 73956482  | rs4883972  |           |        | Associated with bacterial taxa from stool |
| Goodrich et al. 2016 | 3  | 103720795 | rs938421   |           |        | Associated with bacterial taxa from stool |
| Goodrich et al. 2016 | 7  | 71052221  | rs10252758 | CALN1     |        | Associated with bacterial taxa from stool |
| Goodrich et al. 2016 | 6  | 132269034 | rs9373001  |           |        | Associated with bacterial taxa from stool |
| Goodrich et al. 2016 | 2  | 238754423 | rs7604350  |           |        | Associated with bacterial taxa from stool |
| Goodrich et al. 2016 | 8  | 72431928  | rs3808393  | ILKAP     |        | Associated with bacterial taxa from stool |
| Goodrich et al. 2016 | 9  | 115503981 | rs2170226  | EYA1      | EYA1   | EYA1                                      |
| Goodrich et al. 2016 | 3  | 79487728  | rs1489848  | ROBO1     |        | Associated with bacterial taxa from stool |
| Goodrich et al. 2016 | 11 | 20896231  | rs3740874  | NELL1     |        | Associated with bacterial taxa from stool |
| Goodrich et al. 2016 | 4  | 118764835 | rs1948223  | LINC01378 |        | Associated with bacterial taxa from stool |
| Goodrich et al. 2016 | 19 | 270822    | rs4897946  | MIER2     |        | Associated with bacterial taxa from stool |
| Goodrich et al. 2016 | 21 | 42429801  | rs11701867 | UMODL1    |        | Associated with bacterial taxa from stool |
| Goodrich et al. 2016 | 4  | 99186507  | rs4699323  | STPG2     |        | Associated with bacterial taxa from stool |
| Goodrich et al. 2016 | 11 | 79366702  | rs641527   |           |        | Associated with bacterial taxa from stool |
| Goodrich et al. 2016 | 12 | 104285792 | rs7302174  | C12orf75  |        | Associated with bacterial taxa from stool |
| Goodrich et al. 2016 | 15 | 88146339  | rs2007084  | ANPEP     |        | Associated with bacterial taxa from stool |
| Goodrich et al. 2016 | 14 | 21071787  | rs2293702  | SALL2     | SALL2  | Associated with bacterial taxa from stool |
| Goodrich et al. 2016 | 6  | 63950783  | rs9350764  |           |        | Associated with bacterial taxa from stool |
| Goodrich et al. 2016 | 1  | 171158984 | rs12407389 |           |        | Associated with bacterial taxa from stool |
| Goodrich et al. 2016 | 9  | 19878006  | rs10811270 |           |        | Associated with bacterial taxa from stool |
| Goodrich et al. 2016 | 7  | 89975001  | rs12704545 |           |        | Associated with bacterial taxa from stool |
| Goodrich et al. 2016 | 18 | 66436021  | rs1922100  |           |        | Associated with bacterial taxa from stool |
| Goodrich et al. 2016 | 1  | 60463551  | rs12128018 |           |        | Associated with bacterial taxa from stool |
| Goodrich et al. 2016 | 21 | 30474885  | rs2832648  |           |        | Associated with bacterial taxa from stool |
| Goodrich et al. 2016 | 7  | 89697913  | rs194522   | STEAP2    |        | Associated with bacterial taxa from stool |
| Goodrich et al. 2016 | 6  | 157235820 | rs9397979  | ARID1B    |        | Associated with bacterial taxa from stool |
| Goodrich et al. 2016 | 17 | 76494978  | rs12951596 | RPTOR     |        | Associated with bacterial taxa from stool |
| Goodrich et al. 2016 | 8  | 30619064  | rs6999713  | GTF2E2    | SMIM18 | Associated with bacterial taxa from stool |
| Goodrich et al. 2016 | 22 | 29586733  | rs5997791  | OSBP2     |        | Associated with bacterial taxa from stool |
| Goodrich et al. 2016 | 18 | 46140968  | rs7236263  |           |        | Associated with bacterial taxa from stool |
| Goodrich et al. 2016 | 6  | 48782572  | rs10484857 |           |        | Associated with bacterial taxa from stool |
| Goodrich et al. 2016 | 16 | 61017518  | rs9938742  |           |        | Associated with bacterial taxa from stool |
| Goodrich et al. 2016 | 4  | 111255851 | rs1125819  | ELOVL6    |        | Associated with bacterial taxa from stool |
| Goodrich et al. 2016 | 8  | 76481162  | rs3758054  |           |        | Associated with bacterial taxa from stool |
| Goodrich et al. 2016 | 1  | 192653939 | rs10801316 |           |        | Associated with bacterial taxa from stool |
| Goodrich et al. 2016 | 10 | 1451116   | rs2997983  | ADARB2    |        | Associated with bacterial taxa from stool |
| Goodrich et al. 2016 | 2  | 141437110 | rs10928081 | LRP1B     |        | Associated with bacterial taxa from stool |
| Goodrich et al. 2016 | 14 | 97555873  | rs922408   |           |        | Associated with bacterial taxa from stool |
| Goodrich et al. 2016 | 10 | 7580947   | rs4747490  |           |        | Associated with bacterial taxa from stool |

|                      |    |           |            |              |              |  |         |         |                                           |
|----------------------|----|-----------|------------|--------------|--------------|--|---------|---------|-------------------------------------------|
| Goodrich et al. 2016 | 7  | 20328398  | rs206196   | ITGB8        | LOC101927811 |  |         |         | Associated with bacterial taxa from stool |
| Goodrich et al. 2016 | 15 | 91943634  | rs4777927  |              |              |  |         |         | Associated with bacterial taxa from stool |
| Goodrich et al. 2016 | 8  | 109081945 | rs1443930  | RSPO2        |              |  |         |         | Associated with bacterial taxa from stool |
| Goodrich et al. 2016 | 11 | 92899613  | rs2248020  | SMCO4        |              |  |         |         | Associated with bacterial taxa from stool |
| Goodrich et al. 2016 | 11 | 29486823  | rs1231637  |              |              |  |         |         | Associated with bacterial taxa from stool |
| Goodrich et al. 2016 | 14 | 31474478  | rs1278911  |              |              |  |         |         | Associated with bacterial taxa from stool |
| Goodrich et al. 2016 | 14 | 61527138  | rs7156837  | SYT16        |              |  |         |         | Associated with bacterial taxa from stool |
| Goodrich et al. 2016 | 1  | 57734534  | rs4620568  | DAB1         |              |  |         |         | Associated with bacterial taxa from stool |
| Goodrich et al. 2016 | 19 | 60374195  | rs3859542  | DNAAF3       | SYT5         |  | SYT5    |         | Associated with bacterial taxa from stool |
| Goodrich et al. 2016 | 1  | 163737438 | rs185902   | LOC400794    |              |  |         |         | Associated with bacterial taxa from stool |
| Goodrich et al. 2016 | 13 | 22706199  | rs9552886  | SGCG         |              |  |         |         | Associated with bacterial taxa from stool |
| Goodrich et al. 2016 | 11 | 95433599  | rs10501839 | MAML2        |              |  |         |         | Associated with bacterial taxa from stool |
| Goodrich et al. 2016 | 6  | 8976653   | rs380915   |              |              |  |         |         | Associated with bacterial taxa from stool |
| Goodrich et al. 2016 | 11 | 88602610  | rs11018543 | TYR          |              |  |         |         | Associated with bacterial taxa from stool |
| Goodrich et al. 2016 | 3  | 34014997  | rs11710273 |              |              |  |         |         | Associated with bacterial taxa from stool |
| Goodrich et al. 2016 | 3  | 145796966 | rs1405597  |              |              |  |         |         | Associated with bacterial taxa from stool |
| Goodrich et al. 2016 | 7  | 14214435  | rs6461075  | DGKB         |              |  |         |         | Associated with bacterial taxa from stool |
| Goodrich et al. 2016 | 18 | 44882581  | rs11082729 | DYM          |              |  |         |         | Associated with bacterial taxa from stool |
| Goodrich et al. 2016 | 5  | 168362905 | rs10055309 | SLIT3        | LOC728095    |  |         |         | Associated with bacterial taxa from stool |
| Goodrich et al. 2016 | 7  | 155278861 | rs1636874  | SHH          | SHH          |  |         |         | Associated with bacterial taxa from stool |
| Goodrich et al. 2016 | 10 | 32709243  | rs2505338  | LOC102031319 | EPC1         |  |         |         | Associated with bacterial taxa from stool |
| Goodrich et al. 2016 | 2  | 55936079  | rs17369648 |              |              |  |         |         | Associated with bacterial taxa from stool |
| Goodrich et al. 2016 | 13 | 107585336 | rs7318523  |              |              |  |         |         | Associated with bacterial taxa from stool |
| Goodrich et al. 2016 | 17 | 3829058   | rs17763551 |              |              |  |         |         | Associated with bacterial taxa from stool |
| Goodrich et al. 2016 | 8  | 72431928  | rs3808393  | EYA1         | EYA1         |  | EYA1    |         | Associated with bacterial taxa from stool |
| Goodrich et al. 2016 | 3  | 103720795 | rs938421   |              |              |  |         |         | Associated with bacterial taxa from stool |
| Goodrich et al. 2016 | 9  | 73373291  | rs12552904 |              |              |  |         |         | Associated with bacterial taxa from stool |
| Goodrich et al. 2016 | 1  | 55467869  | rs10493180 | MIR4422      |              |  |         |         | Associated with bacterial taxa from stool |
| Goodrich et al. 2016 | 6  | 141900444 | rs10081087 |              |              |  |         |         | Associated with bacterial taxa from stool |
| Goodrich et al. 2016 | 2  | 44564645  | rs786402   | CAMKMT       |              |  |         |         | Associated with bacterial taxa from stool |
| Goodrich et al. 2016 | 16 | 17242000  | rs722075   | XYLT1        |              |  |         |         | Associated with bacterial taxa from stool |
| Goodrich et al. 2016 | 6  | 51114995  | rs4548008  |              |              |  |         |         | Associated with bacterial taxa from stool |
| Goodrich et al. 2016 | 1  | 58877088  | rs232905   |              |              |  |         |         | Associated with bacterial taxa from stool |
| Goodrich et al. 2016 | 14 | 104256711 | rs1128880  | ADSSL1       | INF2         |  |         |         | Associated with bacterial taxa from stool |
| Goodrich et al. 2016 | 15 | 88146339  | rs2007084  | ANPEP        |              |  |         |         | Associated with bacterial taxa from stool |
| Goodrich et al. 2016 | 14 | 21071787  | rs2293702  | SALL2        | SALL2        |  |         |         | Associated with bacterial taxa from stool |
| Goodrich et al. 2016 | 13 | 57707459  | rs4360824  | LINC00374    |              |  |         |         | Associated with bacterial taxa from stool |
| Goodrich et al. 2016 | 3  | 64921131  | rs1523451  | ADAMTS9-AS2  |              |  |         |         | Associated with bacterial taxa from stool |
| Goodrich et al. 2016 | 7  | 21809051  | rs7804316  | DNAH11       |              |  |         |         | Associated with bacterial taxa from stool |
| Goodrich et al. 2016 | 12 | 40611185  | rs1234013  |              |              |  |         |         | Associated with bacterial taxa from stool |
| Goodrich et al. 2016 | 19 | 3681041   | rs7258176  | TJP3         |              |  |         |         | Associated with bacterial taxa from stool |
| Goodrich et al. 2016 | 5  | 149477421 | rs2228440  | PDGFRB       | CSF1R        |  |         |         | Associated with bacterial taxa from stool |
| Goodrich et al. 2016 | 19 | 4045775   | rs350916   | MAP2K2       |              |  |         |         | Associated with bacterial taxa from stool |
| Goodrich et al. 2016 | 10 | 35551900  | rs1148245  |              |              |  |         |         | Associated with bacterial taxa from stool |
| Goodrich et al. 2016 | 2  | 238748040 | rs4663855  | ILKAP        | FAM132B      |  |         |         | Associated with bacterial taxa from stool |
| Goodrich et al. 2016 | 6  | 13985102  | rs1204250  |              |              |  |         |         | Associated with bacterial taxa from stool |
| Goodrich et al. 2016 | 12 | 17385766  | rs1918707  |              |              |  |         |         | Associated with bacterial taxa from stool |
| Goodrich et al. 2016 | 21 | 26791471  | rs2830259  | CYYR1        |              |  |         |         | Associated with bacterial taxa from stool |
| Goodrich et al. 2016 | 18 | 73206697  | rs7231241  |              |              |  |         |         | Associated with bacterial taxa from stool |
| Goodrich et al. 2016 | 11 | 2637391   | rs151216   | KCNQ1OT1     | KCNQ1        |  |         |         | Associated with bacterial taxa from stool |
| Goodrich et al. 2016 | 8  | 21819339  | rs1479056  | DOK2         |              |  |         |         | Associated with bacterial taxa from stool |
| Goodrich et al. 2016 | 12 | 127407050 | rs10847601 | TMEM132C     |              |  |         |         | Associated with bacterial taxa from stool |
| Goodrich et al. 2016 | 3  | 123035055 | rs7646523  | IQCB1        | EAF2         |  |         |         | Associated with bacterial taxa from stool |
| Goodrich et al. 2016 | 2  | 200877238 | rs4673912  | SPATS2L      | SPATS2L      |  | SPATS2L | SPATS2L | Associated with bacterial taxa from stool |
| Goodrich et al. 2016 | 6  | 81739635  | rs11969591 |              |              |  |         |         | Associated with bacterial taxa from stool |
| Goodrich et al. 2016 | 11 | 73278536  | rs10898950 | PAAF1        |              |  |         |         | Associated with bacterial taxa from stool |
| Goodrich et al. 2016 | 11 | 55965983  | rs1945216  |              |              |  |         |         | Associated with bacterial taxa from stool |
| Goodrich et al. 2016 | 10 | 19909284  | rs7095285  | MALRD1       |              |  |         |         | Associated with bacterial taxa from stool |
| Goodrich et al. 2016 | 10 | 27907215  | rs2763309  |              |              |  |         |         | Associated with bacterial taxa from stool |
| Goodrich et al. 2016 | 10 | 77224488  | rs10160195 | C10orf11     |              |  |         |         | Associated with bacterial taxa from stool |
| Goodrich et al. 2016 | 10 | 110648935 | rs12245886 |              |              |  |         |         | Associated with bacterial taxa from stool |
| Goodrich et al. 2016 | 13 | 46034867  | rs9567705  | LRCH1        |              |  |         |         | Associated with bacterial taxa from stool |
| Goodrich et al. 2016 | 16 | 76626535  | rs1955390  | CLEC3A       |              |  |         |         | Associated with bacterial taxa from stool |
| Goodrich et al. 2016 | 1  | 81800564  | rs6674509  | LOC101927434 |              |  |         |         | Associated with bacterial taxa from stool |

|                      |    |           |            |              |              |      |  |                                           |
|----------------------|----|-----------|------------|--------------|--------------|------|--|-------------------------------------------|
| Goodrich et al. 2016 | 2  | 4941253   | rs7602355  |              |              |      |  | Associated with bacterial taxa from stool |
| Goodrich et al. 2016 | 2  | 65020965  | rs11126024 | LOC400958    |              |      |  | Associated with bacterial taxa from stool |
| Goodrich et al. 2016 | 2  | 123084639 | rs4848184  |              |              |      |  | Associated with bacterial taxa from stool |
| Goodrich et al. 2016 | 5  | 78457715  | rs3733890  | BHMT         |              |      |  | Associated with bacterial taxa from stool |
| Goodrich et al. 2016 | 7  | 3231254   | rs13223655 |              |              |      |  | Associated with bacterial taxa from stool |
| Goodrich et al. 2016 | 7  | 19876055  | rs10264784 |              |              |      |  | Associated with bacterial taxa from stool |
| Goodrich et al. 2016 | 6  | 130867974 | rs9402233  |              |              |      |  | Associated with bacterial taxa from stool |
| Goodrich et al. 2016 | 14 | 51083490  | rs17585587 | FRMD6        | FRMD6-AS2    |      |  | Associated with bacterial taxa from stool |
| Goodrich et al. 2016 | 4  | 47400335  | rs10517198 | CORIN        |              |      |  | Associated with bacterial taxa from stool |
| Goodrich et al. 2016 | 8  | 72431928  | rs3808393  | EYA1         | EYA1         | EYA1 |  | Associated with bacterial taxa from stool |
| Goodrich et al. 2016 | 8  | 72431928  | rs3808393  | EYA1         | EYA1         | EYA1 |  | Associated with bacterial taxa from stool |
| Goodrich et al. 2016 | 17 | 56925640  | rs4968435  | TBX4         |              |      |  | Associated with bacterial taxa from stool |
| Goodrich et al. 2016 | 7  | 36894026  | rs17170765 | ELMO1        |              |      |  | Associated with bacterial taxa from stool |
| Goodrich et al. 2016 | 14 | 19954140  | rs1760889  | TEP1         |              |      |  | Associated with bacterial taxa from stool |
| Goodrich et al. 2016 | 6  | 68666312  | rs6933411  |              |              |      |  | Associated with bacterial taxa from stool |
| Goodrich et al. 2016 | 10 | 124110549 | rs984668   |              |              |      |  | Associated with bacterial taxa from stool |
| Goodrich et al. 2016 | 12 | 33299398  | rs7296338  |              |              |      |  | Associated with bacterial taxa from stool |
| Goodrich et al. 2016 | 18 | 41663873  | rs495078   | SIGLEC15     |              |      |  | Associated with bacterial taxa from stool |
| Goodrich et al. 2016 | 3  | 96323544  | rs9790095  |              |              |      |  | Associated with bacterial taxa from stool |
| Goodrich et al. 2016 | 20 | 23045880  | rs1320561  | LINC00656    |              |      |  | Associated with bacterial taxa from stool |
| Goodrich et al. 2016 | 12 | 24987831  | rs3950612  | BCAT1        |              |      |  | Associated with bacterial taxa from stool |
| Goodrich et al. 2016 | 22 | 32803652  | rs5754822  |              |              |      |  | Associated with bacterial taxa from stool |
| Goodrich et al. 2016 | 6  | 50880734  | rs16880682 |              |              |      |  | Associated with bacterial taxa from stool |
| Goodrich et al. 2016 | 22 | 44263738  | rs6007059  |              |              |      |  | Associated with bacterial taxa from stool |
| Goodrich et al. 2016 | 11 | 57547006  | rs6591450  | OR6Q1        | OR9Q1        |      |  | Associated with bacterial taxa from stool |
| Goodrich et al. 2016 | 6  | 37854826  | rs6929224  |              |              |      |  | Associated with bacterial taxa from stool |
| Goodrich et al. 2016 | 13 | 28927722  | rs1986785  | MTUS2        |              |      |  | Associated with bacterial taxa from stool |
| Goodrich et al. 2016 | 2  | 81849078  | rs1221172  |              |              |      |  | Associated with bacterial taxa from stool |
| Goodrich et al. 2016 | 2  | 155004615 | rs7566589  | LOC100144595 | GALNT13      |      |  | Associated with bacterial taxa from stool |
| Goodrich et al. 2016 | 7  | 20328398  | rs206196   | ITGB8        | LOC101927811 |      |  | Associated with bacterial taxa from stool |
| Goodrich et al. 2016 | 3  | 124898204 | rs820335   | MYLK         | MYLK-AS2     |      |  | Associated with bacterial taxa from stool |
| Goodrich et al. 2016 | 13 | 50744067  | rs6561627  | FAM124A      |              |      |  | Associated with bacterial taxa from stool |
| Goodrich et al. 2016 | 8  | 109081945 | rs1443930  | RSPO2        |              |      |  | Associated with bacterial taxa from stool |
| Goodrich et al. 2016 | 1  | 76559855  | rs17098734 | ST6GALNAC3   |              |      |  | Associated with bacterial taxa from stool |
| Goodrich et al. 2016 | 5  | 60478048  | rs295569   | NDUFAF2      |              |      |  | Associated with bacterial taxa from stool |
| Goodrich et al. 2016 | 11 | 73278536  | rs10898950 | PAAF1        |              |      |  | Associated with bacterial taxa from stool |
| Goodrich et al. 2016 | 8  | 109081945 | rs1443930  | RSPO2        |              |      |  | Associated with bacterial taxa from stool |
| Goodrich et al. 2016 | 11 | 73278536  | rs10898950 | PAAF1        |              |      |  | Associated with bacterial taxa from stool |
| Goodrich et al. 2016 | 8  | 109081945 | rs1443930  | RSPO2        |              |      |  | Associated with bacterial taxa from stool |
| Goodrich et al. 2016 | 16 | 12580363  | rs10852352 | SNX29        |              |      |  | Associated with bacterial taxa from stool |
| Goodrich et al. 2016 | 11 | 123104151 | rs2282644  | ZNF202       |              |      |  | Associated with bacterial taxa from stool |
| Goodrich et al. 2016 | 3  | 1797101   | rs7634041  |              |              |      |  | Associated with bacterial taxa from stool |
| Goodrich et al. 2016 | 4  | 118310410 | rs17506987 |              |              |      |  | Associated with bacterial taxa from stool |
| Goodrich et al. 2016 | 4  | 74950676  | rs3117600  | CXCL1        |              |      |  | Associated with bacterial taxa from stool |
| Goodrich et al. 2016 | 1  | 218030535 | rs4565719  |              |              |      |  | Associated with bacterial taxa from stool |
| Goodrich et al. 2016 | 7  | 46635612  | rs10488566 |              |              |      |  | Associated with bacterial taxa from stool |
| Goodrich et al. 2016 | 1  | 173936757 | rs7527642  | TNR          |              |      |  | Associated with bacterial taxa from stool |
| Goodrich et al. 2016 | 2  | 35801306  | rs10221827 |              |              |      |  | Associated with bacterial taxa from stool |
| Goodrich et al. 2016 | 4  | 165194141 | rs6536782  | MARCH1       |              |      |  | Associated with bacterial taxa from stool |
| Goodrich et al. 2016 | 13 | 68700500  | rs7139612  | LINC00383    |              |      |  | Associated with bacterial taxa from stool |
| Goodrich et al. 2016 | 10 | 25904387  | rs12359026 | GPR158       |              |      |  | Associated with bacterial taxa from stool |
| Goodrich et al. 2016 | 9  | 29536701  | rs586749   |              |              |      |  | Associated with bacterial taxa from stool |
| Goodrich et al. 2016 | 22 | 45247677  | rs3788704  | CELSR1       |              |      |  | Associated with bacterial taxa from stool |
| Goodrich et al. 2016 | 1  | 169387892 | rs7886938  | FMO6P        |              |      |  | Associated with bacterial taxa from stool |
| Goodrich et al. 2016 | 4  | 92508459  | rs1881456  | CCSER1       |              |      |  | Associated with bacterial taxa from stool |
| Goodrich et al. 2016 | 18 | 61182485  | rs470497   |              |              |      |  | Associated with bacterial taxa from stool |
| Goodrich et al. 2016 | 12 | 58103214  | rs1514537  |              |              |      |  | Associated with bacterial taxa from stool |
| Goodrich et al. 2016 | 5  | 52213813  | rs2447859  | ITGA1        |              |      |  | Associated with bacterial taxa from stool |
| Goodrich et al. 2016 | 10 | 27907215  | rs2763309  |              |              |      |  | Associated with bacterial taxa from stool |
| Goodrich et al. 2016 | 14 | 62812338  | rs718362   | RHOJ         |              |      |  | Associated with bacterial taxa from stool |
| Goodrich et al. 2016 | 10 | 126805344 | rs2209683  | CTBP2        |              |      |  | Associated with bacterial taxa from stool |
| Goodrich et al. 2016 | 15 | 91943634  | rs4777927  |              |              |      |  | Associated with bacterial taxa from stool |
| Goodrich et al. 2016 | 7  | 142832579 | rs10226151 | EPHA1-AS1    |              |      |  | Associated with bacterial taxa from stool |
| Goodrich et al. 2016 | 19 | 7156240   | rs10426094 | INSR         |              |      |  | Associated with bacterial taxa from stool |
| Goodrich et al. 2016 | 5  | 179596220 | rs6601104  | MAPK9        |              |      |  | Associated with bacterial taxa from stool |



|                      |    |           |                       |          |                |           |        |         |         |        |        |  |  |  |  |  |  |  |                                           |
|----------------------|----|-----------|-----------------------|----------|----------------|-----------|--------|---------|---------|--------|--------|--|--|--|--|--|--|--|-------------------------------------------|
| Goodrich et al. 2016 | 17 | 50918261  | rs11868220            |          |                |           |        |         |         |        |        |  |  |  |  |  |  |  | Associated with bacterial taxa from stool |
| Goodrich et al. 2016 | 8  | 76481162  | rs3758054             |          |                |           |        |         |         |        |        |  |  |  |  |  |  |  | Associated with bacterial taxa from stool |
| Goodrich et al. 2016 | 12 | 71632224  | rs10879524            |          |                |           |        |         |         |        |        |  |  |  |  |  |  |  | Associated with bacterial taxa from stool |
| Goodrich et al. 2016 | 6  | 7933909   | rs7744601             | PIP5K1P1 | BLOC1S5-TXNDC5 |           |        |         |         |        |        |  |  |  |  |  |  |  | Associated with bacterial taxa from stool |
| Goodrich et al. 2016 | 15 | 72272815  | rs12915891            | STRA6    |                |           |        |         |         |        |        |  |  |  |  |  |  |  | Associated with bacterial taxa from stool |
| Goodrich et al. 2016 | 11 | 110733308 | rs2282637             | POU2AF1  | MIR4491        |           |        |         |         |        |        |  |  |  |  |  |  |  | Associated with bacterial taxa from stool |
| Goodrich et al. 2016 | 10 | 106511862 | rs10786820            | SORCS3   |                |           |        |         |         |        |        |  |  |  |  |  |  |  | Associated with bacterial taxa from stool |
| Goodrich et al. 2016 | 5  | 78457715  | rs3733890             | BHMT     |                |           |        |         |         |        |        |  |  |  |  |  |  |  | Associated with bacterial taxa from stool |
| Goodrich et al. 2016 | 4  | 36791724  | rs1346183             |          |                |           |        |         |         |        |        |  |  |  |  |  |  |  | Associated with bacterial taxa from stool |
| Goodrich et al. 2016 | 9  | 86161066  | rs4877854             | SLC28A3  |                |           |        |         |         |        |        |  |  |  |  |  |  |  | Associated with bacterial taxa from stool |
| Goodrich et al. 2016 | 4  | 114838051 | rs987694              | CAMK2D   |                |           |        |         |         |        |        |  |  |  |  |  |  |  | Associated with bacterial taxa from stool |
| Goodrich et al. 2016 | 20 | 25429117  | rs404775              | NINL     |                |           |        |         |         |        |        |  |  |  |  |  |  |  | Associated with bacterial taxa from stool |
| Goodrich et al. 2016 | 3  | 26091594  | rs6772506             |          |                |           |        |         |         |        |        |  |  |  |  |  |  |  | Associated with bacterial taxa from stool |
| Goodrich et al. 2016 | 5  | 73293142  | rs1684851             |          |                |           |        |         |         |        |        |  |  |  |  |  |  |  | Associated with bacterial taxa from stool |
| Goodrich et al. 2016 | 5  | 118673219 | rs17145135            | TNFAIP8  |                |           |        |         |         |        |        |  |  |  |  |  |  |  | Associated with bacterial taxa from stool |
| Goodrich et al. 2016 | 4  | 7047030   | rs3892490             | TBC1D14  |                |           |        |         |         |        |        |  |  |  |  |  |  |  | Associated with bacterial taxa from stool |
| Goodrich et al. 2016 | 6  | 69720601  | rs1889879             | ADGRB3   |                |           |        |         |         |        |        |  |  |  |  |  |  |  | Associated with bacterial taxa from stool |
| Goodrich et al. 2016 | 6  | 148069900 | rs6901947             |          |                |           |        |         |         |        |        |  |  |  |  |  |  |  | Associated with bacterial taxa from stool |
| Goodrich et al. 2016 | 15 | 25717895  | rs1874835             | OCA2     |                |           |        |         |         |        |        |  |  |  |  |  |  |  | Associated with bacterial taxa from stool |
| Goodrich et al. 2016 | 15 | 37343774  | rs16968570            | C15orf54 |                |           |        |         |         |        |        |  |  |  |  |  |  |  | Associated with bacterial taxa from stool |
| Goodrich et al. 2016 | 14 | 67238753  | rs11621258            | RDH12    | RDH11          |           |        |         |         |        |        |  |  |  |  |  |  |  | Associated with bacterial taxa from stool |
| Goodrich et al. 2016 | 11 | 83894200  | rs1367534             | DLG2     |                |           |        |         |         |        |        |  |  |  |  |  |  |  | Associated with bacterial taxa from stool |
| Goodrich et al. 2016 | 11 | 83894200  | rs1367534             | DLG2     |                |           |        |         |         |        |        |  |  |  |  |  |  |  | Associated with bacterial taxa from stool |
| Goodrich et al. 2016 | 18 | 41610180  | rs12455458            |          |                |           |        |         |         |        |        |  |  |  |  |  |  |  | Associated with bacterial taxa from stool |
| Goodrich et al. 2016 | 15 | 83738314  | rs16977800            | AKAP13   |                |           |        |         |         |        |        |  |  |  |  |  |  |  | Associated with bacterial taxa from stool |
| Goodrich et al. 2016 | 17 | 34200870  | rs228307              | PIP4K2B  | CWC25          |           |        |         |         |        |        |  |  |  |  |  |  |  | Associated with bacterial taxa from stool |
| Goodrich et al. 2016 | 3  | 103751762 | rs16845116            |          |                |           |        |         |         |        |        |  |  |  |  |  |  |  | Associated with bacterial taxa from stool |
| Goodrich et al. 2016 | 13 | 31117386  | rs9548456             |          |                |           |        |         |         |        |        |  |  |  |  |  |  |  | Associated with bacterial taxa from stool |
| Goodrich et al. 2016 | 15 | 88122043  | rs12900413            | MESP2    | ANPEP          |           |        |         |         |        |        |  |  |  |  |  |  |  | Associated with bacterial taxa from stool |
| Goodrich et al. 2016 | 1  | 224575268 | rs10915971            |          |                |           |        |         |         |        |        |  |  |  |  |  |  |  | Associated with bacterial taxa from stool |
| Goodrich et al. 2016 | 3  | 28147601  | rs13100072            |          |                |           |        |         |         |        |        |  |  |  |  |  |  |  | Associated with bacterial taxa from stool |
| Goodrich et al. 2016 | 7  | 14927739  | rs10276618            |          |                |           |        |         |         |        |        |  |  |  |  |  |  |  | Associated with bacterial taxa from stool |
| Goodrich et al. 2016 | 6  | 158491694 | rs6933878             | SERAC1   |                |           |        |         |         |        |        |  |  |  |  |  |  |  | Associated with bacterial taxa from stool |
| Goodrich et al. 2016 | 11 | 83894200  | rs1367534             | DLG2     |                |           |        |         |         |        |        |  |  |  |  |  |  |  | Associated with bacterial taxa from stool |
| Wang et al. 2016     | 1  | 172700868 | rs1102737             | FASLG    |                |           |        |         |         |        |        |  |  |  |  |  |  |  | Associated with beta-diversity from stool |
| Wang et al. 2016     | 8  | 10576753  | rs11986935            | SOX7     | SOX7           | -         |        |         |         |        | PINX1  |  |  |  |  |  |  |  | Associated with beta-diversity from stool |
| Wang et al. 2016     | 17 | 782416    | rs12601692            | -        | -              |           |        |         |         |        | NXN    |  |  |  |  |  |  |  | Associated with beta-diversity from stool |
| Wang et al. 2016     | 7  | 104219681 | rs12705241            | -        | -              |           |        |         |         |        | LHFPL3 |  |  |  |  |  |  |  | Associated with beta-diversity from stool |
| Wang et al. 2016     | 1  | 53885577  | rs1288616             | DMRTB1   | DMRTB1         |           |        |         |         |        |        |  |  |  |  |  |  |  | Associated with beta-diversity from stool |
| Wang et al. 2016     | 15 | 26603288  | rs12910631            | -        | -              |           |        |         |         |        |        |  |  |  |  |  |  |  | Associated with beta-diversity from stool |
| Wang et al. 2016     | 6  | 87217958  | rs1292672             | HTR1E    |                |           |        |         |         |        |        |  |  |  |  |  |  |  | Associated with beta-diversity from stool |
| Wang et al. 2016     | 16 | 11031741  | rs12931878            | CLEC16A  | DEXI           | CLEC16A   |        |         |         |        |        |  |  |  |  |  |  |  | Associated with beta-diversity from stool |
| Wang et al. 2016     | 3  | 146250561 | rs13099587            | PLSCR1   | PLSCR1         |           |        |         |         |        |        |  |  |  |  |  |  |  | Associated with beta-diversity from stool |
| Wang et al. 2016     | 3  | 49898318  | rs13100903            | SEMA3F   | RBM5           | MST1R     | CAMKV  | MON1A   | RBM6    | SEMA3F |        |  |  |  |  |  |  |  | Associated with beta-diversity from stool |
| Wang et al. 2016     | 9  | 37626956  | rs1325919             | FRMPD1   |                |           |        |         |         |        |        |  |  |  |  |  |  |  | Associated with beta-diversity from stool |
| Wang et al. 2016     | 8  | 3705807   | rs13260600            | CSMD1    | CSMD1          |           |        |         |         |        |        |  |  |  |  |  |  |  | Associated with beta-diversity from stool |
| Wang et al. 2016     | 8  | 19815256  | rs138022915           | LPL      | LPL            |           |        |         |         |        |        |  |  |  |  |  |  |  | Associated with beta-diversity from stool |
| Wang et al. 2016     | 17 | 32248813  | rs16969051            | ACCN1    | ACCN1          |           |        |         |         |        |        |  |  |  |  |  |  |  | Associated with beta-diversity from stool |
| Wang et al. 2016     | 2  | 135172338 | rs2010917             | MGAT5    | MGAT5          |           |        |         |         |        |        |  |  |  |  |  |  |  | Associated with beta-diversity from stool |
| Wang et al. 2016     | 11 | 8852239   | rs2251536             | -        | ST5            |           |        |         |         |        |        |  |  |  |  |  |  |  | Associated with beta-diversity from stool |
| Wang et al. 2016     | 19 | 18217350  | rs2267922             | IFI30    | MAST3          | IFI30     |        |         |         |        | PIK3R2 |  |  |  |  |  |  |  | Associated with beta-diversity from stool |
| Wang et al. 2016     | 19 | 51739767  | rs273647              | C19orf75 | CD33           | C19orf75  |        |         |         |        |        |  |  |  |  |  |  |  | Associated with beta-diversity from stool |
| Wang et al. 2016     | 19 | 51739767  | rs273647              | C19orf75 | CD33           | C19orf75  |        |         |         |        |        |  |  |  |  |  |  |  | Associated with beta-diversity from stool |
| Wang et al. 2016     | 21 | 38657572  | rs2835692             | DSCR3    |                |           |        |         |         |        |        |  |  |  |  |  |  |  | Associated with beta-diversity from stool |
| Wang et al. 2016     | 15 | 89623490  | rs293377              | ABHD2    | ABHD2          |           |        |         |         |        |        |  |  |  |  |  |  |  | Associated with beta-diversity from stool |
| Wang et al. 2016     | 7  | 151515842 | rs35148810            | -        | PRKAG2         |           |        |         |         |        |        |  |  |  |  |  |  |  | Associated with beta-diversity from stool |
| Wang et al. 2016     | 11 | 120798714 | rs4472950             | -        | GRIK4          |           |        |         |         |        |        |  |  |  |  |  |  |  | Associated with beta-diversity from stool |
| Wang et al. 2016     | 2  | 33808725  | rs4670302 - rs6711771 | FAM98A   | FAM98A         |           |        |         |         |        |        |  |  |  |  |  |  |  | Associated with beta-diversity from stool |
| Wang et al. 2016     | 12 | 93011759  | rs4760399             | C12orf74 |                |           |        |         |         |        |        |  |  |  |  |  |  |  | Associated with beta-diversity from stool |
| Wang et al. 2016     | 20 | 48428863  | rs4809760             | SLC9A8   | RNF114         | SLC9A8    | SPATA2 |         |         |        |        |  |  |  |  |  |  |  | Associated with beta-diversity from stool |
| Wang et al. 2016     | 16 | 3065924   | rs59986499            | CLDN6    | MMP25          | TNFRSF12A | CLDN6  | CCDC64B | HCFC1R1 | THOC6  |        |  |  |  |  |  |  |  | Associated with beta-diversity from stool |
| Wang et al. 2016     | 4  | 102769693 | rs60500975            | -        | BANK1          |           |        |         |         |        |        |  |  |  |  |  |  |  | Associated with beta-diversity from stool |
| Wang et al. 2016     | 17 | 66166300  | rs62085746            | AMZ2     |                |           |        |         |         |        |        |  |  |  |  |  |  |  | Associated with beta-diversity from stool |
| Wang et al. 2016     | 5  | 74171398  | rs62367773            | FAM169A  |                |           |        |         |         |        |        |  |  |  |  |  |  |  | Associated with beta-diversity from stool |

|                    |    |           |                 |               |  |              |        |              |        |                 |                                           |
|--------------------|----|-----------|-----------------|---------------|--|--------------|--------|--------------|--------|-----------------|-------------------------------------------|
| Wang et al. 2016   | 14 | 65119676  | rs6573564       | PLEKHG3       |  |              |        |              |        |                 | Associated with beta-diversity from stool |
| Wang et al. 2016   | 10 | 87865009  | rs7082134       | GRID1         |  |              |        |              |        |                 | Associated with beta-diversity from stool |
| Wang et al. 2016   | 2  | 102309520 | rs71415332      | -             |  |              | MAP4K4 |              |        |                 | Associated with beta-diversity from stool |
| Wang et al. 2016   | 2  | 25323083  | rs72853661      | POMC          |  |              | EFR3B  |              |        |                 | Associated with beta-diversity from stool |
| Wang et al. 2016   | 2  | 61384324  | rs7567349       | XPO1          |  | AHSA2        | USP34  |              | XPO1   | KIAA1841        | Associated with beta-diversity from stool |
| Wang et al. 2016   | 8  | 135273640 | rs7818750       | ZFAT          |  |              |        |              |        |                 | Associated with beta-diversity from stool |
| Wang et al. 2016   | 12 | 48256280  | rs7974353       | -             |  | VDR          |        |              |        |                 | Associated with beta-diversity from stool |
| Wang et al. 2016   | 15 | 101414167 | rs8040493       | -             |  |              |        |              |        |                 | Associated with beta-diversity from stool |
| Wang et al. 2016   | 1  | 33538964  | rs804427        | AK2           |  | ADC          |        |              | TRIM62 | AK2             | Associated with beta-diversity from stool |
| Wang et al. 2016   | 16 | 84566729  | rs8055365       | KIAA1609      |  | KIAA1609     |        |              |        |                 | Associated with beta-diversity from stool |
| Wang et al. 2016   | 3  | 171759410 | rs9647379       | FNDC3B        |  | FNDC3B       |        |              |        |                 | Associated with beta-diversity from stool |
| Wang et al. 2016   | 22 | 31520338  | rs9917541       | PLA2G3        |  | PLA2G3       |        |              | INPP5J |                 | Associated with beta-diversity from stool |
| Wang et al. 2016   | 12 | 4779313   | rs1009634       | AKAP3         |  | NDUFA9       |        |              | GALNT8 | RP11-234B24.2   | Associated with bacterial taxa from stool |
| Wang et al. 2016   | 2  | 129426740 | rs10928827      | HS6ST1        |  |              |        |              |        |                 | Associated with bacterial taxa from stool |
| Wang et al. 2016   | 14 | 90681816  | rs11626933      | C14orf102     |  | C14orf102    |        |              |        |                 | Associated with bacterial taxa from stool |
| Wang et al. 2016   | 4  | 77441448  | rs11724031      | SHROOM3       |  | SHROOM3      |        |              |        |                 | Associated with bacterial taxa from stool |
| Wang et al. 2016   | 18 | 10566345  | rs11877825      | NAPG          |  |              |        |              |        |                 | Associated with bacterial taxa from stool |
| Wang et al. 2016   | 3  | 1452602   | rs11915634      | CNTN6         |  |              |        |              |        |                 | Associated with bacterial taxa from stool |
| Wang et al. 2016   | 16 | 27205994  | rs12149695      | FLJ21408      |  | NSMCE1       |        | FLJ21408     |        | KDM8            | Associated with bacterial taxa from stool |
| Wang et al. 2016   | 15 | 37968393  | rs12442649      | TMCO5A        |  |              |        |              |        |                 | Associated with bacterial taxa from stool |
| Wang et al. 2016   | 3  | 58014818  | rs13096731      | FLNB          |  | FLNB         |        |              |        |                 | Associated with bacterial taxa from stool |
| Wang et al. 2016   | 8  | 56589428  | rs13276516      | TGS1          |  |              |        |              |        |                 | Associated with bacterial taxa from stool |
| Wang et al. 2016   | 16 | 51955443  | rs1362404       | TOX3          |  |              |        |              |        |                 | Associated with bacterial taxa from stool |
| Wang et al. 2016   | 19 | 38497288  | rs148330122     | SIPA1L3       |  | SIPA1L3      |        |              |        |                 | Associated with bacterial taxa from stool |
| Wang et al. 2016   | 9  | 71165704  | rs17085775      | C9orf71       |  |              |        |              |        |                 | Associated with bacterial taxa from stool |
| Wang et al. 2016   | 4  | 131293675 | rs17421787      | RP11-422J15.1 |  |              |        |              |        |                 | Associated with bacterial taxa from stool |
| Wang et al. 2016   | 7  | 48381902  | rs17661843      | ABCA13        |  | ABCA13       |        |              |        |                 | Associated with bacterial taxa from stool |
| Wang et al. 2016   | 20 | 43030809  | rs2071199       | HNF4A-AS1     |  | HNF4A        |        |              |        |                 | Associated with bacterial taxa from stool |
| Wang et al. 2016   | 8  | 139889972 | rs2318350       | COL22A1       |  | COL22A1      |        |              |        |                 | Associated with bacterial taxa from stool |
| Wang et al. 2016   | 5  | 141877862 | rs249733        | SPRY4         |  |              |        |              |        |                 | Associated with bacterial taxa from stool |
| Wang et al. 2016   | 21 | 32184901  | rs34613612      | KRTAP8-1      |  | KRTAP8-1     |        |              |        |                 | Associated with bacterial taxa from stool |
| Wang et al. 2016   | 15 | 60027987  | rs35275482      | BNIP2         |  |              |        |              |        |                 | Associated with bacterial taxa from stool |
| Wang et al. 2016   | 3  | 38161078  | rs3925158       | SLC22A13      |  | SLC22A13     |        | MYD88        | DLEC1  | ACAA1 OXSR1     | Associated with bacterial taxa from stool |
| Wang et al. 2016   | 2  | 217857450 | rs4621152       | AC007557.1    |  |              |        |              |        |                 | Associated with bacterial taxa from stool |
| Wang et al. 2016   | 2  | 9801744   | rs4669413       | RP11-521D12.1 |  |              |        |              |        |                 | Associated with bacterial taxa from stool |
| Wang et al. 2016   | 12 | 3357596   | rs479105        | PRMT8         |  |              |        |              |        |                 | Associated with bacterial taxa from stool |
| Wang et al. 2016   | 2  | 228486044 | rs56006724      | C2orf83       |  | C2orf83      |        |              |        |                 | Associated with bacterial taxa from stool |
| Wang et al. 2016   | 3  | 95359287  | rs59042687      | LINC00879     |  |              |        |              |        |                 | Associated with bacterial taxa from stool |
| Wang et al. 2016   | 1  | 112379026 | rs597205        | C1orf183      |  | C1orf183     |        |              |        |                 | Associated with bacterial taxa from stool |
| Wang et al. 2016   | 3  | 162444724 | rs62295801      | LINC01192     |  | LINC01192    |        |              |        |                 | Associated with bacterial taxa from stool |
| Wang et al. 2016   | 10 | 7020329   | rs7083345       | RP11-554I8.2  |  |              |        |              |        |                 | Associated with bacterial taxa from stool |
| Wang et al. 2016   | 11 | 122091502 | rs7113056       | RP11-166D19.1 |  |              |        |              |        |                 | Associated with bacterial taxa from stool |
| Wang et al. 2016   | 1  | 37717219  | rs75036654      | LINC01137     |  |              |        |              |        |                 | Associated with bacterial taxa from stool |
| Wang et al. 2016   | 3  | 185729634 | rs7646786       | LOC344887     |  |              |        |              |        |                 | Associated with bacterial taxa from stool |
| Wang et al. 2016   | 4  | 9721358   | rs7656342       | DRD5          |  | SLC2A9       |        | DRD5         |        |                 | Associated with bacterial taxa from stool |
| Wang et al. 2016   | 2  | 103099953 | rs79387448      | SLC9A2        |  | SLC9A2       |        |              |        |                 | Associated with bacterial taxa from stool |
| Wang et al. 2016   | 5  | 66515817  | rs9291879       | CD180         |  |              |        |              |        |                 | Associated with bacterial taxa from stool |
| Wang et al. 2016   | 13 | 98269478  | rs9300430       | RAP2A         |  |              |        |              |        |                 | Associated with bacterial taxa from stool |
| Wang et al. 2016   | 14 | 58476448  | rs9323326       | SLC35F4       |  | C14orf37     |        |              |        |                 | Associated with bacterial taxa from stool |
| Wang et al. 2016   | 1  | 16087164  | rs938295        | FBLIM1        |  | FBLIM1       |        |              |        |                 | Associated with bacterial taxa from stool |
| Wang et al. 2016   | 3  | 98879786  | rs9831278       | LINC00973     |  |              |        |              |        |                 | Associated with bacterial taxa from stool |
| Wang et al. 2016   | 14 | 60787269  | rs986417        | SIX6          |  | SIX6         |        | C14orf39     |        | SIX1            | Associated with bacterial taxa from stool |
| Turpin et al. 2016 | 1  | 18103049  | rs6666120       | ACTL8         |  |              |        |              |        |                 | Associated with bacterial taxa from stool |
| Turpin et al. 2016 | 1  | 87721008  | rs6692744       | LOC101927844  |  | LOC105378832 |        | LMO4         |        |                 | Associated with bacterial taxa from stool |
| Turpin et al. 2016 | 2  | 130199082 | rs10202734      | LOC105373613  |  |              |        |              |        |                 | Associated with bacterial taxa from stool |
| Turpin et al. 2016 | 13 | 19674718  | rs36082470      | GTF2IP3       |  | RNA5SP24     |        | PHF2P1       |        | CENPIP1 RNU6-52 | Associated with bacterial taxa from stool |
| Turpin et al. 2016 | 5  | 11089822  | rs16901246      | CTNND2        |  |              |        |              |        |                 | Associated with bacterial taxa from stool |
| Turpin et al. 2016 | 7  | 96414393  | chr7:96414393:D | LOC100506136  |  | LOC105375413 |        | SHFM1        |        | LOC105375414    | Associated with bacterial taxa from stool |
| Turpin et al. 2016 | 19 | 28117024  | rs115795847     | LOC105376906  |  | LOC105372345 |        |              |        |                 | Associated with bacterial taxa from stool |
| Turpin et al. 2016 | 1  | 119944761 | rs147600757     | HAO2          |  | HSD3B2       |        |              |        |                 | Associated with bacterial taxa from stool |
| Turpin et al. 2016 | 2  | 170657022 | rs62171178      | SSB           |  | METTL5       |        | UBR3         |        |                 | Associated with bacterial taxa from stool |
| Turpin et al. 2016 | 10 | 82453481  | rs9421681       | RPS7P9        |  | SH2D4B       |        | LOC105378387 |        | LOC105378386    | Associated with bacterial taxa from stool |
| Turpin et al. 2016 | 1  | 60346014  | chr1:60346014:D | HOOK1         |  | CYP2J2       |        |              |        |                 | Associated with bacterial taxa from stool |
| Turpin et al. 2016 | 6  | 80338468  | chr6:80338468:1 | LCA5          |  | LOC105377866 |        | SH3BGR12     |        |                 | Associated with bacterial taxa from stool |

|                    |    |           |                  |               |              |              |              |        |       |      |  |  |  |  |  |  |  |  |  |  |                                           |                                              |
|--------------------|----|-----------|------------------|---------------|--------------|--------------|--------------|--------|-------|------|--|--|--|--|--|--|--|--|--|--|-------------------------------------------|----------------------------------------------|
| Turpin et al. 2016 | 17 | 15099895  | rs76906435       | LOC105371547  | PMP22        | CDRT8        |              |        |       |      |  |  |  |  |  |  |  |  |  |  | Associated with bacterial taxa from stool |                                              |
| Turpin et al. 2016 | 11 | 76322252  | rs11236806       | C11orf30      | LOC101928813 | LRRC32       |              |        |       |      |  |  |  |  |  |  |  |  |  |  |                                           | Associated with bacterial taxa from stool    |
| Turpin et al. 2016 | 14 | 92611999  | rs10148302       | CPSF2         |              |              |              |        |       |      |  |  |  |  |  |  |  |  |  |  |                                           | Associated with bacterial taxa from stool    |
| Turpin et al. 2016 | 3  | 111964548 | rs13100905       | SLC9C1        |              |              |              |        |       |      |  |  |  |  |  |  |  |  |  |  |                                           | Associated with bacterial taxa from stool    |
| Turpin et al. 2016 | 5  | 18599038  | rs1826812        | RPL36AP21     | LOC100421308 |              |              |        |       |      |  |  |  |  |  |  |  |  |  |  |                                           | Associated with bacterial taxa from stool    |
| Turpin et al. 2016 | 21 | 24749215  | rs35197943       | D21S2088E     |              |              |              |        |       |      |  |  |  |  |  |  |  |  |  |  |                                           | Associated with bacterial taxa from stool    |
| Turpin et al. 2016 | 1  | 246909388 | rs143179968      | SCCPDH        |              |              |              |        |       |      |  |  |  |  |  |  |  |  |  |  |                                           | Associated with bacterial taxa from stool    |
| Turpin et al. 2016 | 12 | 67276489  | rs10748061       | GRIP1         |              |              |              |        |       |      |  |  |  |  |  |  |  |  |  |  |                                           | Associated with bacterial taxa from stool    |
| Turpin et al. 2016 | 3  | 1261480   | rs1394174        | CNTN6         |              |              |              |        |       |      |  |  |  |  |  |  |  |  |  |  |                                           | Associated with bacterial taxa from stool    |
| Turpin et al. 2016 | 1  | 58670059  | rs6683259        | DAB1          |              |              |              |        |       |      |  |  |  |  |  |  |  |  |  |  |                                           | Associated with bacterial taxa from stool    |
| Turpin et al. 2016 | 3  | 294484    | rs73005672       | CHL1          |              |              |              |        |       |      |  |  |  |  |  |  |  |  |  |  |                                           | Associated with bacterial taxa from stool    |
| Turpin et al. 2016 | 7  | 12127071  | rs7782745        | TMEM106B      |              |              |              |        |       |      |  |  |  |  |  |  |  |  |  |  |                                           | Associated with bacterial taxa from stool    |
| Turpin et al. 2016 | 8  | 55244463  | rs10112815       | CHCHD2P10     | RNU105C      | LOC100419615 |              |        |       |      |  |  |  |  |  |  |  |  |  |  |                                           | Associated with bacterial taxa from stool    |
| Turpin et al. 2016 | 12 | 104558085 | rs17806643       | HCFC2         | NFYB         | LOC105369947 | LOC105369948 | TXNRD1 |       |      |  |  |  |  |  |  |  |  |  |  |                                           | Associated with bacterial taxa from stool    |
| Turpin et al. 2016 | 12 | 84247859  | rs11608507       | LOC105369874  |              |              |              |        |       |      |  |  |  |  |  |  |  |  |  |  |                                           | Associated with bacterial taxa from stool    |
| Turpin et al. 2016 | 5  | 42220431  | rs34869836       |               | FBXO4        | LOC101926960 | LOC102723768 | GHR    |       |      |  |  |  |  |  |  |  |  |  |  |                                           | Associated with bacterial taxa from stool    |
| Turpin et al. 2016 | 9  | 120467576 | rs10818073       | TLR4          |              |              |              |        |       |      |  |  |  |  |  |  |  |  |  |  |                                           | Associated with bacterial taxa from stool    |
| Turpin et al. 2016 | 8  | 39933549  | chr8:39933549-1  | IDO1          | IDO2         | LOC105379385 | LOC105379386 | C8orf4 |       |      |  |  |  |  |  |  |  |  |  |  |                                           | Associated with bacterial taxa from stool    |
| Turpin et al. 2016 | 8  | 64277954  | rs13249293       | YTHDF3        | LOC105375873 | LOC105375875 |              |        |       |      |  |  |  |  |  |  |  |  |  |  |                                           | Associated with bacterial taxa from stool    |
| Turpin et al. 2016 | 18 | 25848516  | rs12457158       | CDH2          |              |              |              |        |       |      |  |  |  |  |  |  |  |  |  |  |                                           | Associated with bacterial taxa from stool    |
| Turpin et al. 2016 | 2  | 138532756 | rs2925216        | THSD7B        | LOC101928273 |              |              |        |       |      |  |  |  |  |  |  |  |  |  |  |                                           | Associated with bacterial taxa from stool    |
| Turpin et al. 2016 | 5  | 160455937 | rs113045860      | LOC285629     | LOC105377693 |              |              |        |       |      |  |  |  |  |  |  |  |  |  |  |                                           | Associated with bacterial taxa from stool    |
| Turpin et al. 2016 | 13 | 107282972 | rs9558805        | LINC00551     |              |              |              |        |       |      |  |  |  |  |  |  |  |  |  |  |                                           | Associated with bacterial taxa from stool    |
| Turpin et al. 2016 | 10 | 97301978  | rs11188353       | SORBS1        |              |              |              |        |       |      |  |  |  |  |  |  |  |  |  |  |                                           | Associated with bacterial taxa from stool    |
| Turpin et al. 2016 | 4  | 90832608  | rs3775467        | MMRN1         |              |              |              |        |       |      |  |  |  |  |  |  |  |  |  |  |                                           | Associated with bacterial taxa from stool    |
| Turpin et al. 2016 | 12 | 13622839  | chr12:13622839-D | LINC01559     | RNA5SP353    | GRIN2B       |              |        |       |      |  |  |  |  |  |  |  |  |  |  |                                           | Associated with bacterial taxa from stool    |
| Turpin et al. 2016 | 1  | 198157740 | rs55987656       | NEK7          |              |              |              |        |       |      |  |  |  |  |  |  |  |  |  |  |                                           | Associated with bacterial taxa from stool    |
| Turpin et al. 2016 | 1  | 53946829  | rs59846192       | DMRTB1        | GLIS1        |              |              |        |       |      |  |  |  |  |  |  |  |  |  |  |                                           | Associated with bacterial taxa from stool    |
| Turpin et al. 2016 | 5  | 107323372 | rs10058249       | FBXL17        |              |              |              |        |       |      |  |  |  |  |  |  |  |  |  |  |                                           | Associated with bacterial taxa from stool    |
| Turpin et al. 2016 | 2  | 4666664   | rs7581129        | NPM1P48       | LINC01249    |              |              |        |       |      |  |  |  |  |  |  |  |  |  |  |                                           | Associated with bacterial taxa from stool    |
| Turpin et al. 2016 | 1  | 16265904  | rs41269155       | ZBTB17        | SPEN         |              |              |        |       |      |  |  |  |  |  |  |  |  |  |  |                                           | Associated with bacterial taxa from stool    |
| Turpin et al. 2016 | 3  | 139347358 | rs62273067       | NMNAT3        |              |              |              |        |       |      |  |  |  |  |  |  |  |  |  |  |                                           | Associated with bacterial taxa from stool    |
| Turpin et al. 2016 | 5  | 90301196  | chr5:90301196-1  | ADGRV1        |              |              |              |        |       |      |  |  |  |  |  |  |  |  |  |  |                                           | Associated with bacterial taxa from stool    |
| Turpin et al. 2016 | 7  | 21281203  | rs17739409       | ASS1P11       | RNU1-15P     |              |              |        |       |      |  |  |  |  |  |  |  |  |  |  |                                           | Associated with bacterial taxa from stool    |
| Turpin et al. 2016 | 8  | 111058713 | rs1450758        | KCNV1         | RPSAP48      |              |              |        |       |      |  |  |  |  |  |  |  |  |  |  |                                           | Associated with bacterial taxa from stool    |
| Turpin et al. 2016 | 10 | 71870981  | rs7899016        | H2AFY2        |              |              |              |        |       |      |  |  |  |  |  |  |  |  |  |  |                                           | Associated with bacterial taxa from stool    |
| Turpin et al. 2016 | 18 | 76714322  | rs28473221       | LOC105372224  | LOC645321    | SALL3        |              |        |       |      |  |  |  |  |  |  |  |  |  |  |                                           | Associated with bacterial taxa from stool    |
| Turpin et al. 2016 | 9  | 116185117 | rs112294212      | C9orf43       | RGS3         |              |              |        |       |      |  |  |  |  |  |  |  |  |  |  |                                           | Associated with bacterial taxa from stool    |
| Turpin et al. 2016 | 2  | 128648546 | rs111870934      | POLR2D        | AMMECR1L     | SAP130       |              |        |       |      |  |  |  |  |  |  |  |  |  |  |                                           | Associated with bacterial taxa from stool    |
| Turpin et al. 2016 | 7  | 38465243  | rs74997447       | LOC100506776  | AMPH         |              |              |        |       |      |  |  |  |  |  |  |  |  |  |  |                                           | Associated with bacterial taxa from stool    |
| Turpin et al. 2016 | 13 | 67967187  | rs9541094        | LINC00364     |              |              |              |        |       |      |  |  |  |  |  |  |  |  |  |  |                                           | Associated with bacterial taxa from stool    |
| Turpin et al. 2016 | 22 | 38219943  | rs1800694        | GALR3         | ANKRD54      | MIR658       | MIR659       | EIF3L  |       |      |  |  |  |  |  |  |  |  |  |  |                                           | Associated with bacterial taxa from stool    |
| Turpin et al. 2016 | 3  | 29561962  | rs13081014       | RBMS3         |              |              |              |        |       |      |  |  |  |  |  |  |  |  |  |  |                                           | Associated with bacterial taxa from stool    |
| Turpin et al. 2016 | 6  | 23943584  | chr6:23943584-1  | LOC100129616  | SPTLC1P2     | LOC100128365 | HNRNPA1P58   |        |       |      |  |  |  |  |  |  |  |  |  |  |                                           | Associated with bacterial taxa from stool    |
| Turpin et al. 2016 | 4  | 122695318 | rs6534322        | TMEM155       | PP12613      | EXOSC9       | CCNA         | BBS7   |       |      |  |  |  |  |  |  |  |  |  |  |                                           | Associated with bacterial taxa from stool    |
| Turpin et al. 2016 | 6  | 30092231  | rs9357092        | HLA           | ZNRD1-AS1    | PPP1R11      | RNF39        | HCG8   | HLA-J | HCG9 |  |  |  |  |  |  |  |  |  |  |                                           | Associated with bacterial taxa from stool    |
| Bonder et al. 2016 | 4  | 7584767   | rs10012347       | SORCS2        |              |              |              |        |       |      |  |  |  |  |  |  |  |  |  |  |                                           | Associated with bacterial pathway from stool |
| Bonder et al. 2016 | 10 | 130938725 | rs1041530        |               |              |              |              |        |       |      |  |  |  |  |  |  |  |  |  |  |                                           | Associated with bacterial pathway from stool |
| Bonder et al. 2016 | 12 | 19469078  | rs10743315       | PLEKHA5       |              |              |              |        |       |      |  |  |  |  |  |  |  |  |  |  |                                           | Associated with bacterial taxa from stool    |
| Bonder et al. 2016 | 9  | 29398625  | rs10813066       |               |              |              |              |        |       |      |  |  |  |  |  |  |  |  |  |  |                                           | Associated with bacterial taxa from stool    |
| Bonder et al. 2016 | 3  | 143214462 | rs10935496       | SLC9A9        |              |              |              |        |       |      |  |  |  |  |  |  |  |  |  |  |                                           | Associated with bacterial pathway from stool |
| Bonder et al. 2016 | 18 | 13329915  | rs113062739      | LDLRAD4       |              |              |              |        |       |      |  |  |  |  |  |  |  |  |  |  |                                           | Associated with bacterial pathway from stool |
| Bonder et al. 2016 | 11 | 131213874 | rs11606643       | AP002856.5    |              |              |              |        |       |      |  |  |  |  |  |  |  |  |  |  |                                           | Associated with bacterial pathway from stool |
| Bonder et al. 2016 | 1  | 151244986 | rs12048670       |               |              |              |              |        |       |      |  |  |  |  |  |  |  |  |  |  |                                           | Associated with bacterial pathway from stool |
| Bonder et al. 2016 | 1  | 116209762 | rs12137699       | VANGL1        |              |              |              |        |       |      |  |  |  |  |  |  |  |  |  |  |                                           | Associated with bacterial taxa from stool    |
| Bonder et al. 2016 | 1  | 42273653  | rs12563071       | HIVEP3        |              |              |              |        |       |      |  |  |  |  |  |  |  |  |  |  |                                           | Associated with bacterial pathway from stool |
| Bonder et al. 2016 | 4  | 36068571  | rs12645801       | ARAP2         | RP11-640B6.1 |              |              |        |       |      |  |  |  |  |  |  |  |  |  |  |                                           | Associated with bacterial pathway from stool |
| Bonder et al. 2016 | 3  | 139283462 | rs1497266        | NMNAT3        | RP11-319G6.1 |              |              |        |       |      |  |  |  |  |  |  |  |  |  |  |                                           | Associated with bacterial pathway from stool |
| Bonder et al. 2016 | 5  | 8536853   | rs1666789        |               |              |              |              |        |       |      |  |  |  |  |  |  |  |  |  |  |                                           | Associated with bacterial pathway from stool |
| Bonder et al. 2016 | 11 | 87905990  | rs16913594       | RAB38         | MIR3166      |              |              |        |       |      |  |  |  |  |  |  |  |  |  |  |                                           | Associated with bacterial taxa from stool    |
| Bonder et al. 2016 | 11 | 113157283 | rs17115310       | RP11-839D17.3 |              |              |              |        |       |      |  |  |  |  |  |  |  |  |  |  |                                           | Associated with bacterial taxa from stool    |
| Bonder et al. 2016 | 14 | 95670887  | rs74773701       | CLMN          |              |              |              |        |       |      |  |  |  |  |  |  |  |  |  |  |                                           | Associated with bacterial pathway from stool |
| Bonder et al. 2016 | 2  | 108943203 | rs17770672       | SULT1C2P1     |              |              |              |        |       |      |  |  |  |  |  |  |  |  |  |  |                                           | Associated with bacterial pathway from stool |
| Bonder et al. 2016 | 20 | 48892374  | rs17789629       | RP11-290F20.3 |              |              |              |        |       |      |  |  |  |  |  |  |  |  |  |  |                                           | Associated with bacterial pathway from stool |

|                    |    |           |             |               |               |          |  |                                              |
|--------------------|----|-----------|-------------|---------------|---------------|----------|--|----------------------------------------------|
| Bonder et al. 2016 | 10 | 29388639  | rs1889714   |               |               |          |  | Associated with bacterial taxa from stool    |
| Bonder et al. 2016 | 1  | 4396539   | rs199545687 |               |               |          |  | Associated with bacterial pathway from stool |
| Bonder et al. 2016 | 2  | 84017088  | rs2084597   |               |               |          |  | Associated with bacterial pathway from stool |
| Bonder et al. 2016 | 5  | 168211254 | rs2163761   | SLIT3         |               |          |  | Associated with bacterial pathway from stool |
| Bonder et al. 2016 | 3  | 27024452  | rs2166811   |               |               |          |  | Associated with bacterial pathway from stool |
| Bonder et al. 2016 | 22 | 26283714  | rs2285198   | MYO18B        | CTA-125H2.2   | Z98949.1 |  | Associated with bacterial pathway from stool |
| Bonder et al. 2016 | 21 | 35264397  | rs2834288   | ITSN1         | AP000304.12   |          |  | Associated with bacterial taxa from stool    |
| Bonder et al. 2016 | 3  | 186092559 | rs35598536  |               |               |          |  | Associated with bacterial pathway from stool |
| Bonder et al. 2016 | 14 | 99194007  | rs4144435   |               |               |          |  | Associated with bacterial pathway from stool |
| Bonder et al. 2016 | 6  | 98399521  | rs4548017   | RP11-436D23.1 |               |          |  | Associated with bacterial taxa from stool    |
| Bonder et al. 2016 | 2  | 1855567   | rs4553849   | MYT1L         |               |          |  | Associated with bacterial pathway from stool |
| Bonder et al. 2016 | 3  | 41570365  | rs4973961   | ULK4          |               |          |  | Associated with bacterial pathway from stool |
| Bonder et al. 2016 | 5  | 171998938 | rs56879175  |               |               |          |  | Associated with bacterial pathway from stool |
| Bonder et al. 2016 | 2  | 71101426  | rs6546647   |               |               |          |  | Associated with bacterial pathway from stool |
| Bonder et al. 2016 | 6  | 88902490  | rs6933130   |               |               |          |  | Associated with bacterial pathway from stool |
| Bonder et al. 2016 | 8  | 42472274  | rs7016086   |               |               |          |  | Associated with bacterial pathway from stool |
| Bonder et al. 2016 | 12 | 27957533  | rs7133214   | RN7SKP15      | RP11-860B13.3 |          |  | Associated with bacterial pathway from stool |
| Bonder et al. 2016 | 2  | 241123546 | rs7605872   |               |               |          |  | Associated with bacterial taxa from stool    |
| Bonder et al. 2016 | 5  | 104668046 | rs78533343  | RP11-6N13.1   |               |          |  | Associated with bacterial pathway from stool |
| Bonder et al. 2016 | 13 | 60824702  | rs7992913   |               |               |          |  | Associated with bacterial pathway from stool |
| Bonder et al. 2016 | 3  | 63644694  | rs924067    | SNTN          |               |          |  | Associated with bacterial pathway from stool |
| Bonder et al. 2016 | 6  | 56209251  | rs9475677   | COL21A1       |               |          |  | Associated with bacterial pathway from stool |
| Bonder et al. 2016 | 1  | 110770223 | rs958798    | KCNC4         |               |          |  | Associated with bacterial pathway from stool |
| Bonder et al. 2016 | 12 | 8397529   | rs9669179   | FAM86FP       | RP11-266K4.9  |          |  | Associated with bacterial pathway from stool |

\* See main text for full references.

**Table S6.** Correlations between microbial beta-diversity measurements and predictor variables using Mantel test.

|                                | n  | Bray Curtis |                  | unweighted UniFrac |          | weighted UniFrac |              |
|--------------------------------|----|-------------|------------------|--------------------|----------|------------------|--------------|
|                                |    | Mantel r    | p-value*         | Mantel r           | p-value* | Mantel r         | p-value*     |
| Genetic distance               | 50 | <b>0.14</b> | <b>0.004</b>     | 0.12               | 0.012    | 0.10             | 0.037        |
| Geographic distance (km)       | 50 | 0.07        | 0.078            | 0.10               | 0.035    | 0.06             | 0.148        |
| Body weight (g)                | 50 | 0.08        | 0.232            | 0.12               | 0.121    | 0.07             | 0.337        |
| BMI (g/mm <sup>2</sup> )       | 50 | <b>0.25</b> | <b>&lt;0.001</b> | 0.12               | 0.165    | <b>0.23</b>      | <b>0.005</b> |
| Diet ( $\delta^{13}\text{C}$ ) | 50 | 0.14        | 0.044            | 0.06               | 0.482    | -0.01            | 0.898        |
| Diet ( $\delta^{15}\text{N}$ ) | 50 | 0.04        | 0.67             | -0.01              | 0.924    | 0.00             | 0.993        |
| ClimatePC1                     | 50 | 0.10        | 0.066            | 0.09               | 0.156    | 0.10             | 0.072        |
| ClimatePC2                     | 50 | 0.01        | 0.913            | 0.04               | 0.488    | -0.05            | 0.403        |

\*Raw P-values that are lower than Bonferroni corrected p-value =  $0.05/8 = 0.0063$  are bolded

**Table S7.** Correlations between host genetic distance and Bray-Curtis dissimilarity using Partial Mantel test controlling for seven variables.

| Variables controlled           | n  | Partial Mantel<br>r | p-value |
|--------------------------------|----|---------------------|---------|
| Geographic distance (km)       | 50 | 0.12                | 0.008   |
| Body weight (g)                | 50 | 0.13                | 0.002   |
| BMI (g/mm <sup>2</sup> )       | 50 | 0.13                | 0.004   |
| Diet ( $\delta^{13}\text{C}$ ) | 50 | 0.14                | 0.002   |
| Diet ( $\delta^{15}\text{N}$ ) | 50 | 0.14                | 0.003   |
| ClimatePC1                     | 50 | 0.10                | 0.028   |
| ClimatePC2                     | 50 | 0.09                | 0.008   |

**Table S8.** Differences in microbial measurements among wild and lab populations.

| Microbial measurements <sup>1</sup>  | Wild         |         |              |         | Lab          |         |              |         | Significance (Wilcoxon test) |                                   |       |       |       |
|--------------------------------------|--------------|---------|--------------|---------|--------------|---------|--------------|---------|------------------------------|-----------------------------------|-------|-------|-------|
|                                      | North (n=10) |         | South (n=10) |         | North (n=40) |         | South (n=38) |         | Wild vs Lab <sup>2</sup>     | Wild                              |       | Lab   |       |
|                                      | Mean         | (SD)    | Mean         | (SD)    | Mean         | (SD)    | Mean         | (SD)    |                              | North                             | South | North | South |
|                                      |              |         |              |         |              |         |              |         | Raw p-values                 | Pairwise comparisons <sup>3</sup> |       |       |       |
| <b>Alpha-diversity</b>               |              |         |              |         |              |         |              |         |                              |                                   |       |       |       |
| OTU counts                           | 408.5        | (46.8)  | 351.2        | (41.4)  | 365.7        | (43.5)  | 345.9        | (44.7)  | NS                           | a                                 | ab    | ab    | b     |
| Phylogenetic diversity               | 38.7         | (3.4)   | 34.6         | (2.5)   | 33.7         | (3.2)   | 32.6         | (3.4)   | 0.0005                       | a                                 | b     | b     | b     |
| Shannon index                        | 6.57         | (0.41)  | 6.15         | (0.63)  | 5.87         | (0.45)  | 5.89         | (0.41)  | 0.0002                       | a                                 | ab    | b     | b     |
| <b>Phylum Firmicutes</b>             | 0.477        | (0.100) | 0.426        | (0.162) | 0.284        | (0.090) | 0.366        | (0.150) | 0.0004                       | a                                 | ab    | b     | ab    |
| Genus <i>Clostridiales unc</i>       | 0.251        | (0.081) | 0.213        | (0.120) | 0.181        | (0.054) | 0.234        | (0.101) | NS                           | a                                 | a     | a     | a     |
| Genus <i>Lachnospiraceae unc</i>     | 0.063        | (0.040) | 0.057        | (0.030) | 0.025        | (0.017) | 0.044        | (0.028) | 0.0003                       | a                                 | a     | b     | a     |
| Genus <i>Lactobacillus</i>           | 0.016        | (0.023) | 0.007        | (0.006) | 0.014        | (0.016) | 0.022        | (0.018) | 0.01                         | a                                 | a     | a     | a     |
| Genus <i>Oscillospira</i>            | 0.062        | (0.023) | 0.064        | (0.014) | 0.028        | (0.016) | 0.031        | (0.020) | <0.0001                      | a                                 | a     | b     | b     |
| Genus <i>Ruminococcaceae unc</i>     | 0.049        | (0.014) | 0.050        | (0.023) | 0.018        | (0.013) | 0.021        | (0.019) | <0.0001                      | a                                 | a     | b     | b     |
| Genus <i>Ruminococcus</i>            | 0.013        | (0.006) | 0.017        | (0.008) | 0.004        | (0.002) | 0.006        | (0.004) | <0.0001                      | ac                                | a     | b     | bc    |
| <b>Phylum Bacteroidetes</b>          | 0.325        | (0.109) | 0.420        | (0.201) | 0.618        | (0.100) | 0.535        | (0.158) | <0.0001                      | a                                 | ab    | b     | b     |
| Genus <i>Bacteroides</i>             | 0.084        | (0.051) | 0.112        | (0.089) | 0.090        | (0.057) | 0.093        | (0.071) | NS                           | a                                 | a     | a     | a     |
| Genus <i>Bacteroidales unc</i>       | 0.036        | (0.022) | 0.016        | (0.020) | 0.073        | (0.035) | 0.064        | (0.043) | <0.0001                      | ab                                | a     | b     | b     |
| Genus <i>Odoribacter</i>             | 0.013        | (0.013) | 0.013        | (0.020) | 0.044        | (0.038) | 0.058        | (0.038) | <0.0001                      | a                                 | a     | b     | b     |
| Genus <i>Parabacteroides</i>         | 0.016        | (0.015) | 0.012        | (0.007) | 0.003        | (0.006) | 0.004        | (0.004) | <0.0001                      | a                                 | a     | b     | b     |
| Genus <i>Prevotella</i>              | 0.020        | (0.024) | 0.022        | (0.033) | 0.011        | (0.035) | 0.004        | (0.015) | <0.0001                      | a                                 | a     | b     | b     |
| Genus <i>Rikenellaceae_unc</i>       | 0.046        | (0.029) | 0.033        | (0.026) | 0.181        | (0.092) | 0.148        | (0.083) | <0.0001                      | a                                 | a     | b     | b     |
| Genus <i>S24_7_unc</i>               | 0.103        | (0.053) | 0.199        | (0.129) | 0.202        | (0.128) | 0.149        | (0.102) | NS                           | a                                 | a     | a     | a     |
| <b>Phylum Proteobacteria</b>         | 0.161        | (0.054) | 0.117        | (0.103) | 0.072        | (0.037) | 0.063        | (0.036) | <0.0001                      | a                                 | ab    | b     | b     |
| Genus <i>Desulfovibrionaceae unc</i> | 0.044        | (0.042) | 0.027        | (0.038) | 0.001        | (0.002) | 0.004        | (0.006) | <0.0001                      | a                                 | ab    | b     | b     |
| Genus <i>Helicobacteraceae unc</i>   | 0.039        | (0.025) | 0.047        | (0.102) | 0.050        | (0.034) | 0.029        | (0.024) | NS                           | a                                 | a     | a     | a     |
| Genus <i>Helicobacter</i>            | 0.064        | (0.064) | 0.001        | (0.003) | 0.165        | (0.019) | 0.008        | (0.013) | NS                           | ab                                | a     | b     | a     |
| <b>Phylum Deferribacteres</b>        | 0.021        | (0.016) | 0.028        | (0.052) | 0.004        | (0.005) | 0.012        | (0.014) | 0.03                         | a                                 | ab    | b     | ab    |
| Genus <i>Mucispirillum</i>           | 0.021        | (0.016) | 0.028        | (0.052) | 0.004        | (0.005) | 0.012        | (0.014) | 0.03                         | a                                 | ab    | b     | ab    |

<sup>1</sup> Microbial measurements include three alpha-diversity measurements and relative abundance of bacterial phyla and genera.

<sup>2</sup> Comparisons between Wild (North and South combined, n=20) and Lab (North and South combined, n = 78).

<sup>3</sup> Non-overlapping letters indicate significance based on Wilcoxon test using Bonferroni corrected p-value (alpha = 0.05/24 = 0.002)

**Table S9.** Genotype-bacteria associations using all populations and within populations.

| Chr    | Bp        | Genes <sup>1</sup>              | Bacterial measurements <sup>2</sup> | All populations                  |                | Consistent genotype directions <sup>4</sup> | Within Populations          |       |         |         |         |
|--------|-----------|---------------------------------|-------------------------------------|----------------------------------|----------------|---------------------------------------------|-----------------------------|-------|---------|---------|---------|
|        |           |                                 |                                     | Genotype directions <sup>3</sup> | ANOVA P-values |                                             | ANOVA P-values <sup>5</sup> |       |         |         |         |
|        |           |                                 |                                     |                                  |                |                                             | FL                          | GA    | VA      | PA      | NH_VT   |
| 3      | 68695548  | <i>Il12a</i>                    | <i>Odoribacter</i>                  | AA > GA > GG                     | 0.0014         | 3 out of 5                                  | 0.020                       | 0.001 | (0.259) | 0.428   | (0.045) |
| 3      | 86138574  | <i>Snord73a, Rnu73b, Rps3a1</i> | <i>Bacteroides</i>                  | AC > AA                          | 0.0021         | 2 out of 3                                  | 0.013                       | -     | -       | 0.001   | (0.830) |
| 4      | 103170679 | <i>Mier1, Slc35d1</i>           | Phylogenetic diversity              | TT > TC                          | 0.1107         | 2 out of 2                                  | -                           | -     | -       | 0.130   | 0.220   |
| 4      | 89692441  | <i>Dmrt1</i>                    | <i>Bacteroides</i>                  | GG > GA > AA                     | 0.0005         | 2 out of 3                                  | 0.017                       | -     | (0.367) | <0.0001 | -       |
| 5      | 90490831  | <i>Afp</i>                      | <i>Bacteroides</i>                  | AA > GA > GG                     | 0.0006         | 3 out of 4                                  | 0.030                       | -     | (0.336) | 0.001   | 0.978   |
| 6      | 121222841 | <i>Tuba8, Gm15856</i>           | <i>Bacteroides</i>                  | TC > TT                          | 0.0004         | 3 out of 4                                  | 0.010                       | -     | 0.209   | 0.001   | (0.813) |
| 6      | 128374454 | <i>Foxm1, Tex52</i>             | Phylogenetic diversity              | GG > GT                          | < 0.0001       | 5 out of 5                                  | 0.046                       | 0.018 | 0.128   | 0.025   | 0.250   |
| 8      | 120092803 | <i>Zdhc7, Gm20388, Gm15898</i>  | <i>Bacteroides</i>                  | CT > CC                          | < 0.0001       | 3 out of 3                                  | 0.010                       | 0.059 | -       | 0.001   | -       |
| 8      | 13142468  | <i>Cul4a</i>                    | <i>Bacteroides</i>                  | CT > CC                          | 0.0006         | 4 out of 4                                  | 0.334                       | 0.076 | -       | 0.001   | 0.720   |
| 8      | 16358320  | <i>Csm1</i>                     | Phylogenetic diversity              | CC > CT > TT                     | 0.0125         | 4 out of 4                                  | 0.681                       | 0.352 | -       | 0.014   | 0.541   |
| 11     | 3132802   | <i>Sfi1, Pisd-ps1</i>           | Phylogenetic diversity              | CC > CA                          | 0.0159         | 4 out of 4                                  | 0.262                       | 0.560 | -       | 0.041   | 0.220   |
| 13     | 33671503  | <i>Serp1b6d</i>                 | <i>Bacteroides</i>                  | CT > CC                          | < 0.0001       | 2 out of 2                                  | 0.0014                      | -     | -       | 0.0007  | -       |
| Total: |           |                                 |                                     |                                  |                | 37 out of 43                                |                             |       |         |         |         |

<sup>1</sup> The SNP with lowest p-value was selected when more than one SNP was included in the gene.<sup>2</sup> Residuals after covariate regression (i.e. Genetic PC1-4 and Latitude) on box-cox transformed relative abundances of bacterial taxa and alpha-diversity were used.<sup>3</sup> The directions of the genotype-bacteria associations were based on the average values of bacterial measurements for each genotype.<sup>4</sup> The proportions of individual populations that genotype-bacteria associations are in the same direction as the all-population result.<sup>5</sup> P-values in parentheses indicate that genotype-bacteria associations are in the opposite direction compared to the all-population result.



**Table S10.** Loci significantly associated with microbial measurements (q-value < 0.1) in wild mouse mGWAS using human candidate genes.

| Chr | Bp        | Annotated gene(s) | Associated microbial measurements | P-values <sup>1</sup> | Q-values |
|-----|-----------|-------------------|-----------------------------------|-----------------------|----------|
| 2   | 21367906  | <i>Gpr158</i>     | <i>Clostridiales_unc</i>          | 9.03E-06              | 0.053    |
| 5   | 148315352 | <i>Mtus2</i>      | <i>Phylogenetic diversity</i>     | 5.44E-05              | 0.084    |
| 6   | 113765833 |                   | <i>Ruminococcus</i>               | 7.55E-06              | 0.074    |
| 6   | 113817432 | <i>Atp2b2</i>     | <i>Phylogenetic diversity</i>     | 4.01E-05              | 0.074    |
| 6   | 113817441 |                   | <i>Phylogenetic diversity</i>     | 1.31E-05              | 0.030    |
| 6   | 144993723 | <i>Bcat1</i>      | <i>Clostridiales_unc</i>          | 1.12E-05              | 0.053    |
| 6   | 48445226  | <i>Sspo</i>       | <i>Bacteroides</i>                | 4.38E-05              | 0.088    |
| 8   | 16358320  |                   |                                   | 1.09E-06              | 0.010    |
| 8   | 16358359  | <i>Csmd1</i>      | <i>Phylogenetic diversity</i>     | 3.89E-06              | 0.018    |
| 12  | 104780917 | <i>Clmn</i>       | <i>Bacteroides</i>                | 3.07E-05              | 0.088    |
| 12  | 75308870  |                   |                                   | 1.90E-05              | 0.088    |
| 12  | 75308871  | <i>Bcat1</i>      | <i>Bacteroides</i>                | 5.83E-05              | 0.093    |
| 12  | 75308874  |                   |                                   | 1.53E-05              | 0.088    |
| 12  | 75394205  | <i>Rhoj</i>       | <i>Phylogenetic diversity</i>     | 5.70E-06              | 0.018    |
| 13  | 69612885  | <i>Nsun2</i>      | <i>Bacteroides</i>                | 4.40E-05              | 0.088    |
| 15  | 5217545   | <i>Ptger4</i>     | <i>Bacteroides</i>                | 6.50E-05              | 0.093    |

<sup>1</sup> Likelihood ratio p-values.

<sup>2</sup> ANOVA R<sup>2</sup> values. Residuals after covariate regression (i.e. Genetic PC1-4 and Latitude) on box-cox transformed relative abundances of bacterial taxa and alpha-diversity were used.

**Table 11. Significant loci associated with microbial measurements in wild mouse mGWAS (Q<0.2)**

| Taxa                   | chr | rs          | ps        | n_miss | allele1 | allele0 | af    | beta     | se       | l_reml   | l_mle    | p_wald   | p_lrt    | qvalues  | p_score  | EnsembleID          | VariantType                                   | Codon Change |
|------------------------|-----|-------------|-----------|--------|---------|---------|-------|----------|----------|----------|----------|----------|----------|----------|----------|---------------------|-----------------------------------------------|--------------|
| Phylogenetic diversity | 6   | 6_128374454 | 128374454 | 0      | T       | G       | 0.11  | 5.10E-01 | 1.03E-01 | 1.00E-05 | 1.00E+05 | 9.33E-06 | 4.09E-07 | 0.051478 | 4.62E-05 | ENSMUSG00000001517  | downstream_gene_variant                       | -            |
| Phylogenetic diversity | 6   | 6_128374454 | 128374454 | 0      | T       | G       | 0.11  | 5.10E-01 | 1.03E-01 | 1.00E-05 | 1.00E+05 | 9.33E-06 | 4.09E-07 | 0.051478 | 4.62E-05 | ENSMUSG00000001517  | 3_prime_UTR_variant                           | -            |
| Phylogenetic diversity | 6   | 6_128374454 | 128374454 | 0      | T       | G       | 0.11  | 5.10E-01 | 1.03E-01 | 1.00E-05 | 1.00E+05 | 9.33E-06 | 4.09E-07 | 0.051478 | 4.62E-05 | ENSMUSG00000079304  | upstream_gene_variant                         | -            |
| Phylogenetic diversity | 6   | 6_128374521 | 128374521 | 0      | C       | T       | 0.11  | 5.10E-01 | 1.03E-01 | 1.00E-05 | 1.00E+05 | 9.33E-06 | 4.09E-07 | 0.051478 | 4.62E-05 | ENSMUSG00000001517  | downstream_gene_variant                       | -            |
| Phylogenetic diversity | 6   | 6_128374521 | 128374521 | 0      | C       | T       | 0.11  | 5.10E-01 | 1.03E-01 | 1.00E-05 | 1.00E+05 | 9.33E-06 | 4.09E-07 | 0.051478 | 4.62E-05 | ENSMUSG00000001517  | 3_prime_UTR_variant                           | -            |
| Phylogenetic diversity | 6   | 6_128374521 | 128374521 | 0      | C       | T       | 0.11  | 5.10E-01 | 1.03E-01 | 1.00E-05 | 1.00E+05 | 9.33E-06 | 4.09E-07 | 0.051478 | 4.62E-05 | ENSMUSG00000079304  | upstream_gene_variant                         | -            |
| Phylogenetic diversity | 11  | 11_3132802  | 3132802   | 2      | A       | C       | 0.073 | 6.05E-01 | 1.24E-01 | 1.00E-05 | 1.00E+05 | 1.23E-05 | 8.39E-07 | 0.054876 | 6.32E-05 | ENSMUSG00000023764  | non_coding_exon_variant,nc_transcript_variant | -            |
| Phylogenetic diversity | 11  | 11_3132802  | 3132802   | 2      | A       | C       | 0.073 | 6.05E-01 | 1.24E-01 | 1.00E-05 | 1.00E+05 | 1.23E-05 | 8.39E-07 | 0.054876 | 6.32E-05 | ENSMUSG00000023764  | intron_variant                                | -            |
| Phylogenetic diversity | 11  | 11_3132802  | 3132802   | 2      | A       | C       | 0.073 | 6.05E-01 | 1.24E-01 | 1.00E-05 | 1.00E+05 | 1.23E-05 | 8.39E-07 | 0.054876 | 6.32E-05 | ENSMUSG00000082286  | downstream_gene_variant                       | -            |
| Phylogenetic diversity | 11  | 11_3132802  | 3132802   | 2      | A       | C       | 0.073 | 6.05E-01 | 1.24E-01 | 1.00E-05 | 1.00E+05 | 1.23E-05 | 8.39E-07 | 0.054876 | 6.32E-05 | ENSMUSG00000023764  | downstream_gene_variant                       | -            |
| Phylogenetic diversity | 6   | 6_128374742 | 128374742 | 0      | A       | T       | 0.12  | 4.48E-01 | 9.05E-02 | 1.00E-05 | 1.00E+05 | 9.44E-06 | 9.63E-07 | 0.054876 | 6.71E-05 | ENSMUSG00000001517  | downstream_gene_variant                       | -            |
| Phylogenetic diversity | 6   | 6_128374742 | 128374742 | 0      | A       | T       | 0.12  | 4.48E-01 | 9.05E-02 | 1.00E-05 | 1.00E+05 | 9.44E-06 | 9.63E-07 | 0.054876 | 6.71E-05 | ENSMUSG00000001517  | 3_prime_UTR_variant                           | -            |
| Phylogenetic diversity | 6   | 6_128374742 | 128374742 | 0      | A       | T       | 0.12  | 4.48E-01 | 9.05E-02 | 1.00E-05 | 1.00E+05 | 9.44E-06 | 9.63E-07 | 0.054876 | 6.71E-05 | ENSMUSG00000079304  | upstream_gene_variant                         | -            |
| Phylogenetic diversity | 8   | 8_16358320  | 16358320  | 0      | T       | C       | 0.18  | 3.84E-01 | 7.60E-02 | 2.80E+00 | 1.00E+05 | 6.58E-06 | 1.09E-06 | 0.054876 | 7.10E-05 | ENSMUSG00000006924  | intron_variant                                | -            |
| Phylogenetic diversity | 4   | 4_103170679 | 103170679 | 2      | C       | T       | 0.042 | 8.05E-01 | 1.72E-01 | 1.94E+00 | 1.00E+05 | 2.41E-05 | 2.19E-06 | 0.09188  | 9.78E-05 | ENSMUSG00000028522  | downstream_gene_variant                       | -            |
| Phylogenetic diversity | 4   | 4_103170679 | 103170679 | 2      | C       | T       | 0.042 | 8.05E-01 | 1.72E-01 | 1.94E+00 | 1.00E+05 | 2.41E-05 | 2.19E-06 | 0.09188  | 9.78E-05 | ENSMUSG00000028521  | 3_prime_UTR_variant                           | -            |
| Phylogenetic diversity | 8   | 8_13142468  | 13142468  | 1      | T       | C       | 0.041 | 7.20E-01 | 1.63E-01 | 1.00E-05 | 1.00E+05 | 5.81E-05 | 3.48E-06 | 0.122402 | 1.22E-04 | ENSMUSG00000031446  | upstream_gene_variant                         | -            |
| Phylogenetic diversity | 8   | 8_13142468  | 13142468  | 1      | T       | C       | 0.041 | 7.20E-01 | 1.63E-01 | 1.00E-05 | 1.00E+05 | 5.81E-05 | 3.48E-06 | 0.122402 | 1.22E-04 | ENSMUSG00000031446  | intron_variant                                | -            |
| Phylogenetic diversity | 8   | 8_16358359  | 16358359  | 2      | C       | A       | 0.146 | 3.38E-01 | 7.91E-02 | 1.00E-05 | 1.00E+05 | 8.93E-05 | 3.89E-06 | 0.122402 | 1.28E-04 | ENSMUSG00000006924  | non_coding_exon_variant,nc_transcript_variant | -            |
| Phylogenetic diversity | 8   | 8_16358359  | 16358359  | 2      | C       | A       | 0.146 | 3.38E-01 | 7.91E-02 | 1.00E-05 | 1.00E+05 | 8.93E-05 | 3.89E-06 | 0.122402 | 1.28E-04 | ENSMUSG00000006924  | synonymous_variant                            | gcT/gcG      |
| Phylogenetic diversity | 12  | 12_75394205 | 75394205  | 0      | T       | C       | 0.18  | 3.47E-01 | 7.51E-02 | 2.23E+00 | 1.00E+05 | 2.94E-05 | 5.70E-06 | 0.159427 | 1.55E-04 | ENSMUSG000000046768 | intron_variant                                | -            |
| Phylogenetic diversity | 12  | 12_75394205 | 75394205  | 0      | T       | C       | 0.18  | 3.47E-01 | 7.51E-02 | 2.23E+00 | 1.00E+05 | 2.94E-05 | 5.70E-06 | 0.159427 | 1.55E-04 | ENSMUSG000000046768 | 3_prime_UTR_variant                           | -            |
| Phylogenetic diversity | 1   | 1_88236753  | 88236753  | 0      | T       | C       | 0.48  | 9.53E-01 | 2.30E-01 | 1.00E-05 | 1.00E+05 | 1.34E-04 | 7.16E-06 | 0.161824 | 1.73E-04 | ENSMUSG00000079429  | intron_variant                                | -            |
| Phylogenetic diversity | 1   | 1_88236753  | 88236753  | 0      | T       | C       | 0.48  | 9.53E-01 | 2.30E-01 | 1.00E-05 | 1.00E+05 | 1.34E-04 | 7.16E-06 | 0.161824 | 1.73E-04 | ENSMUSG00000079429  | upstream_gene_variant                         | -            |
| Phylogenetic diversity | 1   | 1_88236753  | 88236753  | 0      | T       | C       | 0.48  | 9.53E-01 | 2.30E-01 | 1.00E-05 | 1.00E+05 | 1.34E-04 | 7.16E-06 | 0.161824 | 1.73E-04 | ENSMUSG00000079429  | downstream_gene_variant                       | -            |
| Phylogenetic diversity | 5   | 5_90526381  | 90526381  | 1      | A       | G       | 0.041 | 5.35E-01 | 1.35E-01 | 1.00E-05 | 1.00E+05 | 2.50E-04 | 8.32E-06 | 0.161824 | 1.87E-04 | ENSMUSG00000029369  | missense_variant                              | Gga/Aga      |
| Phylogenetic diversity | 11  | 11_57787336 | 57787336  | 0      | A       | G       | 0.16  | 4.12E-01 | 9.59E-02 | 5.23E-02 | 1.00E+05 | 8.53E-05 | 6.91E-06 | 0.161824 | 1.70E-04 | ENSMUSG00000020520  | 3_prime_UTR_variant                           | -            |
| Phylogenetic diversity | 6   | 6_128375274 | 128375274 | 0      | T       | C       | 0.13  | 4.00E-01 | 9.22E-02 | 1.00E-05 | 1.00E+05 | 7.21E-05 | 8.79E-06 | 0.161824 | 1.92E-04 | ENSMUSG00000001517  | downstream_gene_variant                       | -            |

|                        |    |    |           |           |   |   |   |       |          |          |          |          |          |          |          |          |                    |                                               |         |
|------------------------|----|----|-----------|-----------|---|---|---|-------|----------|----------|----------|----------|----------|----------|----------|----------|--------------------|-----------------------------------------------|---------|
| Phylogenetic diversity | 6  | 6  | 128375274 | 128375274 | 0 | T | C | 0.13  | 4.00E-01 | 9.22E-02 | 1.00E-05 | 1.00E+05 | 7.21E-05 | 8.79E-06 | 0.161824 | 1.92E-04 | ENSMUSG00000001517 | 3_prime_UTR_variant                           | -       |
| Phylogenetic diversity | 6  | 6  | 128375274 | 128375274 | 0 | T | C | 0.13  | 4.00E-01 | 9.22E-02 | 1.00E-05 | 1.00E+05 | 7.21E-05 | 8.79E-06 | 0.161824 | 1.92E-04 | ENSMUSG00000079304 | upstream_gene_variant                         | -       |
| Phylogenetic diversity | 2  | 2  | 94301405  | 94301405  | 0 | T | A | 0.04  | 6.95E-01 | 1.72E-01 | 5.01E-01 | 1.00E+05 | 1.95E-04 | 1.16E-05 | 0.161824 | 2.21E-04 | ENSMUSG00000027194 | 3_prime_UTR_variant                           | -       |
| Phylogenetic diversity | 7  | 7  | 141426886 | 141426886 | 0 | T | A | 0.29  | 2.41E-01 | 6.36E-02 | 1.00E-05 | 1.00E+05 | 4.26E-04 | 1.20E-05 | 0.161824 | 2.25E-04 | ENSMUSG00000019082 | downstream_gene_variant                       | -       |
| Phylogenetic diversity | 7  | 7  | 141426886 | 141426886 | 0 | T | A | 0.29  | 2.41E-01 | 6.36E-02 | 1.00E-05 | 1.00E+05 | 4.26E-04 | 1.20E-05 | 0.161824 | 2.25E-04 | ENSMUSG00000060240 | intron_variant                                | -       |
| Phylogenetic diversity | 7  | 7  | 141426886 | 141426886 | 0 | T | A | 0.29  | 2.41E-01 | 6.36E-02 | 1.00E-05 | 1.00E+05 | 4.26E-04 | 1.20E-05 | 0.161824 | 2.25E-04 | ENSMUSG00000060240 | 3_prime_UTR_variant                           | -       |
| Phylogenetic diversity | 6  | 6  | 128374511 | 128374511 | 0 | T | A | 0.1   | 4.60E-01 | 1.13E-01 | 1.00E-05 | 1.00E+05 | 1.74E-04 | 1.22E-05 | 0.161824 | 2.27E-04 | ENSMUSG00000001517 | downstream_gene_variant                       | -       |
| Phylogenetic diversity | 6  | 6  | 128374511 | 128374511 | 0 | T | A | 0.1   | 4.60E-01 | 1.13E-01 | 1.00E-05 | 1.00E+05 | 1.74E-04 | 1.22E-05 | 0.161824 | 2.27E-04 | ENSMUSG00000001517 | 3_prime_UTR_variant                           | -       |
| Phylogenetic diversity | 6  | 6  | 128374511 | 128374511 | 0 | T | A | 0.1   | 4.60E-01 | 1.13E-01 | 1.00E-05 | 1.00E+05 | 1.74E-04 | 1.22E-05 | 0.161824 | 2.27E-04 | ENSMUSG00000079304 | upstream_gene_variant                         | -       |
| Phylogenetic diversity | 7  | 7  | 24925094  | 24925094  | 0 | A | G | 0.09  | 4.83E-01 | 1.17E-01 | 1.00E-05 | 1.00E+05 | 1.53E-04 | 1.25E-05 | 0.161824 | 2.30E-04 | ENSMUSG00000040940 | downstream_gene_variant                       | -       |
| Phylogenetic diversity | 7  | 7  | 24925094  | 24925094  | 0 | A | G | 0.09  | 4.83E-01 | 1.17E-01 | 1.00E-05 | 1.00E+05 | 1.53E-04 | 1.25E-05 | 0.161824 | 2.30E-04 | ENSMUSG00000040940 | intron_variant                                | -       |
| Phylogenetic diversity | 12 | 12 | 32205995  | 32205995  | 0 | T | C | 0.11  | 3.84E-01 | 9.17E-02 | 3.48E-01 | 1.00E+05 | 1.18E-04 | 1.27E-05 | 0.161824 | 2.32E-04 | ENSMUSG00000020573 | upstream_gene_variant                         | -       |
| Phylogenetic diversity | 12 | 12 | 32205995  | 32205995  | 0 | T | C | 0.11  | 3.84E-01 | 9.17E-02 | 3.48E-01 | 1.00E+05 | 1.18E-04 | 1.27E-05 | 0.161824 | 2.32E-04 | ENSMUSG00000020573 | 5_prime_UTR_variant                           | -       |
| Phylogenetic diversity | 6  | 6  | 113817441 | 113817441 | 0 | T | C | 0.41  | 2.72E-01 | 6.22E-02 | 1.00E-05 | 1.00E+05 | 6.51E-05 | 1.31E-05 | 0.161824 | 2.35E-04 | ENSMUSG00000030302 | intron_variant                                | -       |
| Phylogenetic diversity | 3  | 3  | 10314899  | 10314899  | 1 | G | A | 0.082 | 5.19E-01 | 1.22E-01 | 1.00E-05 | 1.00E+05 | 1.00E-04 | 1.32E-05 | 0.161824 | 2.36E-04 | ENSMUSG00000027531 | 3_prime_UTR_variant                           | -       |
| Phylogenetic diversity | 2  | 2  | 91674525  | 91674525  | 1 | T | G | 0.061 | 4.49E-01 | 1.21E-01 | 1.00E-05 | 1.00E+05 | 5.65E-04 | 1.35E-05 | 0.161824 | 2.39E-04 | ENSMUSG00000027247 | downstream_gene_variant                       | -       |
| Phylogenetic diversity | 2  | 2  | 91674525  | 91674525  | 1 | T | G | 0.061 | 4.49E-01 | 1.21E-01 | 1.00E-05 | 1.00E+05 | 5.65E-04 | 1.35E-05 | 0.161824 | 2.39E-04 | ENSMUSG00000027244 | downstream_gene_variant                       | -       |
| Phylogenetic diversity | 7  | 7  | 134270142 | 134270142 | 0 | T | C | 0.08  | 4.34E-01 | 1.04E-01 | 2.10E+00 | 1.00E+05 | 1.30E-04 | 1.65E-05 | 0.188795 | 2.65E-04 | ENSMUSG00000030994 | intron_variant                                | -       |
| Clostridiales_unc      | 9  | 9  | 106071836 | 106071836 | 0 | T | C | 0.18  | 1.60E-01 | 3.12E-02 | 1.00E-05 | 1.00E+05 | 5.12E-06 | 5.05E-07 | 0.12347  | 5.06E-05 | ENSMUSG00000032572 | intron_variant                                | -       |
| Clostridiales_unc      | 2  | 2  | 21367906  | 21367906  | 0 | T | C | 0.23  | 1.21E-01 | 2.70E-02 | 9.74E-01 | 1.00E+05 | 4.62E-05 | 9.03E-06 | 0.1577   | 1.95E-04 | ENSMUSG00000085680 | intron_variant                                | -       |
| Clostridiales_unc      | 2  | 2  | 21367906  | 21367906  | 0 | T | C | 0.23  | 1.21E-01 | 2.70E-02 | 9.74E-01 | 1.00E+05 | 4.62E-05 | 9.03E-06 | 0.1577   | 1.95E-04 | ENSMUSG00000045967 | 5_prime_UTR_variant                           | -       |
| Clostridiales_unc      | 2  | 2  | 21367906  | 21367906  | 0 | T | C | 0.23  | 1.21E-01 | 2.70E-02 | 9.74E-01 | 1.00E+05 | 4.62E-05 | 9.03E-06 | 0.1577   | 1.95E-04 | ENSMUSG00000045967 | non_coding_exon_variant,nc_transcript_variant | -       |
| Clostridiales_unc      | 3  | 3  | 87440123  | 87440123  | 0 | G | T | 0.32  | 1.16E-01 | 2.62E-02 | 1.00E-05 | 1.00E+05 | 1.12E-04 | 5.25E-06 | 0.1577   | 1.77E-04 | ENSMUSG00000048031 | intron_variant                                | -       |
| Clostridiales_unc      | 3  | 3  | 87440335  | 87440335  | 0 | C | G | 0.26  | 1.19E-01 | 2.77E-02 | 2.38E-01 | 1.00E+05 | 5.29E-05 | 9.02E-06 | 0.1577   | 1.48E-04 | ENSMUSG00000048031 | intron_variant                                | -       |
| Clostridiales_unc      | 3  | 3  | 87440340  | 87440340  | 0 | T | C | 0.25  | 1.19E-01 | 2.77E-02 | 6.29E-02 | 1.00E+05 | 8.75E-05 | 9.02E-06 | 0.1577   | 1.95E-04 | ENSMUSG00000048031 | intron_variant                                | -       |
| Clostridiales_unc      | 3  | 3  | 87440341  | 87440341  | 0 | G | A | 0.25  | 1.19E-01 | 2.77E-02 | 6.29E-02 | 1.00E+05 | 8.75E-05 | 9.02E-06 | 0.1577   | 1.95E-04 | ENSMUSG00000048031 | intron_variant                                | -       |
| Clostridiales_unc      | 3  | 3  | 87442103  | 87442103  | 0 | A | G | 0.3   | 1.20E-01 | 2.33E-02 | 1.00E+05 | 1.00E+05 | 5.01E-06 | 2.84E-06 | 0.1577   | 1.10E-04 | ENSMUSG00000048031 | missense_variant                              | Gta/Ata |
| Clostridiales_unc      | 3  | 3  | 87442103  | 87442103  | 0 | A | G | 0.3   | 1.20E-01 | 2.33E-02 | 1.00E+05 | 1.00E+05 | 5.01E-06 | 2.84E-06 | 0.1577   | 1.10E-04 | ENSMUSG00000048031 | intron_variant                                | -       |
| Clostridiales_unc      | 3  | 3  | 87442187  | 87442187  | 0 | G | A | 0.3   | 1.20E-01 | 2.33E-02 | 1.00E+05 | 1.00E+05 | 5.01E-06 | 2.84E-06 | 0.1577   | 1.10E-04 | ENSMUSG00000048031 | missense_variant                              | Aag/Gag |
| Clostridiales_unc      | 3  | 3  | 87442187  | 87442187  | 0 | G | A | 0.3   | 1.10E-01 | 2.24E-02 | 1.00E+05 | 1.00E+05 | 5.01E-06 | 6.14E-06 | 0.1577   | 1.10E-04 | ENSMUSG00000048031 | intron_variant                                | -       |
| Clostridiales_unc      | 3  | 3  | 87443684  | 87443684  | 0 | A | C | 0.32  | 1.10E-01 | 2.24E-02 | 1.00E+05 | 1.00E+05 | 1.04E-05 | 5.04E-06 | 0.1577   | 1.61E-04 | ENSMUSG00000048031 | missense_variant                              | tAt/ICt |
| Clostridiales_unc      | 4  | 4  | 132356533 | 132356533 | 0 | A | G | 0.15  | 1.63E-01 | 3.32E-02 | 1.00E-05 | 1.00E+05 | 1.10E-05 | 5.04E-06 | 0.1577   | 1.46E-04 | ENSMUSG00000066043 | downstream_gene_variant                       | -       |
| Clostridiales_unc      | 4  | 4  | 132356533 | 132356533 | 0 | A | G | 0.15  | 1.63E-01 | 3.32E-02 | 1.00E-05 | 1.00E+05 | 1.10E-05 | 5.04E-06 | 0.1577   | 1.46E-04 | ENSMUSG00000085241 | upstream_gene_variant                         | -       |
| Clostridiales_unc      | 4  | 4  | 132356533 | 132356533 | 0 | A | G | 0.15  | 1.63E-01 | 3.32E-02 | 1.00E-05 | 1.00E+05 | 1.10E-05 | 5.04E-06 | 0.1577   | 1.46E-04 | ENSMUSG00000066043 | 3_prime_UTR_variant                           | -       |
| Clostridiales_unc      | 4  | 4  | 132356533 | 132356533 | 0 | A | G | 0.15  | 1.63E-01 | 3.32E-02 | 1.00E-05 | 1.00E+05 | 1.10E-05 | 5.04E-06 | 0.1577   | 1.46E-04 | ENSMUSG00000091021 | downstream_gene_variant                       | -       |
| Clostridiales_unc      | 4  | 4  | 132356533 | 132356533 | 0 | A | G | 0.15  | 1.63E-01 | 3.32E-02 | 1.00E-05 | 1.00E+05 | 1.10E-05 | 5.04E-06 | 0.1577   | 1.46E-04 | ENSMUSG00000064387 | upstream_gene_variant                         | -       |

|                   |    |              |           |   |   |   |       |          |          |          |          |          |          |          |          |                    |                                               |         |
|-------------------|----|--------------|-----------|---|---|---|-------|----------|----------|----------|----------|----------|----------|----------|----------|--------------------|-----------------------------------------------|---------|
| Clostridiales_unc | 4  | 4_132356533  | 132356533 | 0 | A | G | 0.15  | 1.63E-01 | 3.32E-02 | 1.00E-05 | 1.00E+05 | 1.10E-05 | 5.04E-06 | 0.1577   | 1.46E-04 | ENSMUSG00000065353 | upstream_gene_variant                         | -       |
| Clostridiales_unc | 4  | 4_132356533  | 132356533 | 0 | A | G | 0.15  | 1.63E-01 | 3.32E-02 | 1.00E-05 | 1.00E+05 | 1.10E-05 | 5.04E-06 | 0.1577   | 1.46E-04 | ENSMUSG00000028896 | upstream_gene_variant                         | -       |
| Clostridiales_unc | 10 | 10_13553200  | 13553200  | 0 | G | T | 0.08  | 2.17E-01 | 4.54E-02 | 2.01E+00 | 1.00E+05 | 1.69E-05 | 4.97E-06 | 0.1577   | 1.45E-04 | ENSMUSG00000019809 | upstream_gene_variant                         | -       |
| Clostridiales_unc | 10 | 10_13553200  | 13553200  | 0 | G | T | 0.08  | 2.17E-01 | 4.54E-02 | 2.01E+00 | 1.00E+05 | 1.69E-05 | 4.97E-06 | 0.1577   | 1.45E-04 | ENSMUSG00000019808 | 5_prime_UTR_variant                           | -       |
| Clostridiales_unc | 10 | 10_70448825  | 70448825  | 1 | A | T | 0.173 | 1.29E-01 | 2.84E-02 | 1.00E-05 | 1.00E+05 | 3.56E-05 | 6.61E-06 | 0.1577   | 1.67E-04 | ENSMUSG00000043259 | intron_variant                                | -       |
| Clostridiales_unc | 12 | 12_112775647 | 112775647 | 0 | T | A | 0.39  | 1.13E-01 | 2.41E-02 | 1.83E+00 | 1.00E+05 | 2.44E-05 | 5.24E-06 | 0.1577   | 1.48E-04 | ENSMUSG00000072812 | missense_variant                              | Att/Ttt |
| Clostridiales_unc | 12 | 12_112775647 | 112775647 | 0 | T | A | 0.39  | 1.13E-01 | 2.41E-02 | 1.83E+00 | 1.00E+05 | 2.44E-05 | 5.24E-06 | 0.1577   | 1.48E-04 | ENSMUSG00000072812 | upstream_gene_variant                         | -       |
| Clostridiales_unc | 12 | 12_112775647 | 112775647 | 0 | T | A | 0.39  | 1.13E-01 | 2.41E-02 | 1.83E+00 | 1.00E+05 | 2.44E-05 | 5.24E-06 | 0.1577   | 1.48E-04 | ENSMUSG00000072812 | downstream_gene_variant                       | -       |
| Clostridiales_unc | 15 | 15_73783540  | 73783540  | 0 | A | G | 0.23  | 1.21E-01 | 2.34E-02 | 1.00E-05 | 1.00E+05 | 5.01E-06 | 1.59E-06 | 0.1577   | 8.42E-05 | ENSMUSG00000072487 | downstream_gene_variant                       | -       |
| Clostridiales_unc | 15 | 15_73783540  | 73783540  | 0 | A | G | 0.23  | 1.21E-01 | 2.34E-02 | 1.00E-05 | 1.00E+05 | 5.01E-06 | 1.59E-06 | 0.1577   | 8.42E-05 | ENSMUSG00000072487 | non_coding_exon_variant,nc_transcript_variant | -       |
| Clostridiales_unc | 15 | 15_73783540  | 73783540  | 0 | A | G | 0.23  | 1.21E-01 | 2.34E-02 | 1.00E-05 | 1.00E+05 | 5.01E-06 | 1.59E-06 | 0.1577   | 8.42E-05 | ENSMUSG00000072487 | missense_variant                              | aCg/aTg |
| Clostridiales_unc | 2  | 2_181601302  | 181601302 | 0 | T | C | 0.14  | 1.40E-01 | 3.22E-02 | 1.00E-05 | 1.00E+05 | 7.25E-05 | 1.20E-05 | 0.162139 | 2.25E-04 | ENSMUSG00000038605 | upstream_gene_variant                         | -       |
| Clostridiales_unc | 2  | 2_181601302  | 181601302 | 0 | T | C | 0.14  | 1.40E-01 | 3.22E-02 | 1.00E-05 | 1.00E+05 | 7.25E-05 | 1.20E-05 | 0.162139 | 2.25E-04 | ENSMUSG00000002455 | upstream_gene_variant                         | -       |
| Clostridiales_unc | 2  | 2_181601302  | 181601302 | 0 | T | C | 0.14  | 1.40E-01 | 3.22E-02 | 1.00E-05 | 1.00E+05 | 7.25E-05 | 1.20E-05 | 0.162139 | 2.25E-04 | ENSMUSG00000002455 | intron_variant                                | -       |
| Clostridiales_unc | 3  | 3_87443666   | 87443666  | 0 | C | A | 0.33  | 1.09E-01 | 2.30E-02 | 1.00E+05 | 1.00E+05 | 2.07E-05 | 1.26E-05 | 0.162139 | 2.31E-04 | ENSMUSG00000048031 | missense_variant                              | cC/cAt  |
| Clostridiales_unc | 6  | 6_144993723  | 144993723 | 1 | A | G | 0.071 | 2.05E-01 | 4.50E-02 | 1.00E-05 | 1.00E+05 | 3.77E-05 | 1.12E-05 | 0.162139 | 2.17E-04 | ENSMUSG00000030268 | downstream_gene_variant                       | -       |
| Clostridiales_unc | 8  | 8_110971625  | 110971625 | 0 | T | C | 0.09  | 1.64E-01 | 3.60E-02 | 1.00E-05 | 1.00E+05 | 3.80E-05 | 1.26E-05 | 0.162139 | 2.30E-04 | ENSMUSG00000015023 | downstream_gene_variant                       | -       |
| Clostridiales_unc | 8  | 8_110971625  | 110971625 | 0 | T | C | 0.09  | 1.64E-01 | 3.60E-02 | 1.00E-05 | 1.00E+05 | 3.80E-05 | 1.26E-05 | 0.162139 | 2.30E-04 | ENSMUSG00000031749 | downstream_gene_variant                       | -       |
| Clostridiales_unc | 8  | 8_110971625  | 110971625 | 0 | T | C | 0.09  | 1.64E-01 | 3.60E-02 | 1.00E-05 | 1.00E+05 | 3.80E-05 | 1.26E-05 | 0.162139 | 2.30E-04 | ENSMUSG00000031749 | 3_prime_UTR_variant                           | -       |
| Clostridiales_unc | 19 | 19_10218949  | 10218949  | 1 | C | A | 0.133 | 1.62E-01 | 3.57E-02 | 1.00E-05 | 1.00E+05 | 3.97E-05 | 1.17E-05 | 0.162139 | 2.22E-04 | ENSMUSG00000036098 | intron_variant                                | -       |
| Clostridiales_unc | 17 | 17_34216100  | 34216100  | 0 | T | C | 0.42  | 9.11E-02 | 2.19E-02 | 1.00E-05 | 1.00E+05 | 1.28E-04 | 1.37E-05 | 0.16748  | 2.41E-04 | ENSMUSG00000024339 | non_coding_exon_variant,nc_transcript_variant | -       |
| Clostridiales_unc | 17 | 17_34216100  | 34216100  | 0 | T | C | 0.42  | 9.11E-02 | 2.19E-02 | 1.00E-05 | 1.00E+05 | 1.28E-04 | 1.37E-05 | 0.16748  | 2.41E-04 | ENSMUSG00000024339 | 3_prime_UTR_variant                           | -       |
| Clostridiales_unc | 17 | 17_34216100  | 34216100  | 0 | T | C | 0.42  | 9.11E-02 | 2.19E-02 | 1.00E-05 | 1.00E+05 | 1.28E-04 | 1.37E-05 | 0.16748  | 2.41E-04 | ENSMUSG00000081512 | upstream_gene_variant                         | -       |
| Bacteroides       | 5  | 5_90490831   | 90490831  | 0 | A | G | 0.09  | 3.65E-01 | 5.81E-02 | 7.23E-01 | 1.00E+05 | 9.13E-08 | 1.27E-08 | 0.001556 | 1.20E-05 | ENSMUSG00000054932 | synonymous_variant                            | gcG/gcA |
| Bacteroides       | 5  | 5_90490846   | 90490846  | 0 | T | C | 0.09  | 3.65E-01 | 5.81E-02 | 7.23E-01 | 1.00E+05 | 9.13E-08 | 1.27E-08 | 0.001556 | 1.20E-05 | ENSMUSG00000054932 | synonymous_variant                            | caC/caT |
| Bacteroides       | 5  | 5_90491657   | 90491657  | 0 | A | C | 0.12  | 2.96E-01 | 5.07E-02 | 8.02E-01 | 1.00E+05 | 4.43E-07 | 8.67E-08 | 0.007083 | 2.46E-05 | ENSMUSG00000054932 | intron_variant                                | -       |
| Bacteroides       | 8  | 8_120092803  | 120092803 | 0 | T | C | 0.04  | 5.25E-01 | 9.65E-02 | 1.00E-05 | 1.00E+05 | 1.74E-06 | 3.38E-07 | 0.02071  | 4.27E-05 | ENSMUSG00000089742 | upstream_gene_variant                         | -       |
| Bacteroides       | 8  | 8_120092803  | 120092803 | 0 | T | C | 0.04  | 5.25E-01 | 9.65E-02 | 1.00E-05 | 1.00E+05 | 1.74E-06 | 3.38E-07 | 0.02071  | 4.27E-05 | ENSMUSG00000031823 | intron_variant                                | -       |
| Bacteroides       | 8  | 8_120092803  | 120092803 | 0 | T | C | 0.04  | 5.25E-01 | 9.65E-02 | 1.00E-05 | 1.00E+05 | 1.74E-06 | 3.38E-07 | 0.02071  | 4.27E-05 | ENSMUSG00000031823 | upstream_gene_variant                         | -       |
| Bacteroides       | 8  | 8_120092803  | 120092803 | 0 | T | C | 0.04  | 5.25E-01 | 9.65E-02 | 1.00E-05 | 1.00E+05 | 1.74E-06 | 3.38E-07 | 0.02071  | 4.27E-05 | ENSMUSG00000031823 | downstream_gene_variant                       | -       |
| Bacteroides       | 8  | 8_120092803  | 120092803 | 0 | T | C | 0.04  | 5.25E-01 | 9.65E-02 | 1.00E-05 | 1.00E+05 | 1.74E-06 | 3.38E-07 | 0.02071  | 4.27E-05 | ENSMUSG00000092329 | intron_variant                                | -       |
| Bacteroides       | 4  | 4_89692441   | 89692441  | 0 | G | A | 0.09  | 3.47E-01 | 6.45E-02 | 2.66E+00 | 1.00E+05 | 2.21E-06 | 4.73E-07 | 0.023186 | 4.92E-05 | ENSMUSG00000043753 | downstream_gene_variant                       | -       |
| Bacteroides       | 4  | 4_89692441   | 89692441  | 0 | G | A | 0.09  | 3.47E-01 | 6.45E-02 | 2.66E+00 | 1.00E+05 | 2.21E-06 | 4.73E-07 | 0.023186 | 4.92E-05 | ENSMUSG00000043753 | 3_prime_UTR_variant                           | -       |
| Bacteroides       | 3  | 3_86138574   | 86138574  | 0 | C | A | 0.07  | 3.92E-01 | 7.75E-02 | 1.00E-05 | 1.00E+05 | 6.66E-06 | 6.90E-07 | 0.028185 | 5.79E-05 | ENSMUSG00000064984 | downstream_gene_variant                       | -       |
| Bacteroides       | 3  | 3_86138574   | 86138574  | 0 | C | A | 0.07  | 3.92E-01 | 7.75E-02 | 1.00E-05 | 1.00E+05 | 6.66E-06 | 6.90E-07 | 0.028185 | 5.79E-05 | ENSMUSG00000064390 | downstream_gene_variant                       | -       |
| Bacteroides       | 3  | 3_86138574   | 86138574  | 0 | C | A | 0.07  | 4.79E-01 | 1.01E-01 | 1.00E-05 | 1.00E+05 | 6.66E-06 | 1.38E-07 | 0.028185 | 5.79E-05 | ENSMUSG00000028081 | synonymous_variant                            | ggG/ggT |
| Bacteroides       | 13 | 13_33671503  | 33671503  | 0 | T | C | 0.04  | 3.62E-01 | 7.43E-02 | 1.00E-05 | 1.00E+05 | 2.07E-05 | 1.77E-06 | 0.048318 | 7.89E-05 | ENSMUSG00000047889 | 3_prime_UTR_variant                           | -       |
| Bacteroides       | 3  | 3_86138475   | 86138475  | 0 | C | T | 0.08  | 3.62E-01 | 7.43E-02 | 1.00E-05 | 1.00E+05 | 1.23E-05 | 1.77E-06 | 0.054226 | 8.84E-05 | ENSMUSG00000064984 | downstream_gene_variant                       | -       |
| Bacteroides       | 3  | 3_86138475   | 86138475  | 0 | C | T | 0.08  | 3.62E-01 | 7.43E-02 | 1.00E-05 | 1.00E+05 | 1.23E-05 | 1.77E-06 | 0.054226 | 8.84E-05 | ENSMUSG00000064390 | downstream_gene_variant                       | -       |
| Bacteroides       | 3  | 3_86138475   | 86138475  | 0 | C | T | 0.08  | 3.62E-01 | 7.43E-02 | 1.00E-05 | 1.00E+05 | 1.23E-05 | 1.77E-06 | 0.054226 | 8.84E-05 | ENSMUSG00000028081 | intron_variant                                | -       |
| Bacteroides       | 3  | 3_86138625   | 86138625  | 1 | C | T | 0.071 | 3.38E-01 | 6.75E-02 | 1.00E-05 | 1.00E+05 | 7.78E-06 | 2.00E-06 | 0.054464 | 9.36E-05 | ENSMUSG00000064984 | downstream_gene_variant                       | -       |
| Bacteroides       | 3  | 3_86138625   | 86138625  | 1 | C | T | 0.071 | 3.38E-01 | 6.75E-02 | 1.00E-05 | 1.00E+05 | 7.78E-06 | 2.00E-06 | 0.054464 | 9.36E-05 | ENSMUSG00000064390 | downstream_gene_variant                       | -       |
| Bacteroides       | 3  | 3_86138625   | 86138625  | 1 | C | T | 0.071 | 3.38E-01 | 6.75E-02 | 1.00E-05 | 1.00E+05 | 7.78E-06 | 2.00E-06 | 0.054464 | 9.36E-05 | ENSMUSG00000028081 | intron_variant                                | -       |

|             |    |             |           |   |   |   |       |          |          |          |          |          |          |          |          |                     |                                               |         |
|-------------|----|-------------|-----------|---|---|---|-------|----------|----------|----------|----------|----------|----------|----------|----------|---------------------|-----------------------------------------------|---------|
| Bacteroides | 6  | 6_121222841 | 121222841 | 0 | C | T | 0.06  | 4.24E-01 | 8.22E-02 | 1.00E-05 | 1.00E+05 | 4.83E-06 | 3.03E-06 | 0.074262 | 1.14E-04 | ENSMUSG00000030137  | synonymous_variant                            | taT/taC |
| Bacteroides | 6  | 6_121222841 | 121222841 | 0 | C | T | 0.06  | 4.24E-01 | 8.22E-02 | 1.00E-05 | 1.00E+05 | 4.83E-06 | 3.03E-06 | 0.074262 | 1.14E-04 | ENSMUSG000000086527 | downstream_gene_variant                       | -       |
| Bacteroides | 8  | 8_13142468  | 13142468  | 1 | T | C | 0.041 | 4.78E-01 | 1.02E-01 | 1.00E-05 | 1.00E+05 | 2.17E-05 | 3.56E-06 | 0.07932  | 1.23E-04 | ENSMUSG000000031446 | upstream_gene_variant                         | -       |
| Bacteroides | 8  | 8_13142468  | 13142468  | 1 | T | C | 0.041 | 4.78E-01 | 1.02E-01 | 1.00E-05 | 1.00E+05 | 2.17E-05 | 3.56E-06 | 0.07932  | 1.23E-04 | ENSMUSG000000031446 | intron_variant                                | -       |
| Bacteroides | 6  | 6_121221243 | 121221243 | 1 | A | G | 0.061 | 4.19E-01 | 8.28E-02 | 1.00E-05 | 1.00E+05 | 6.48E-06 | 4.19E-06 | 0.085577 | 1.33E-04 | ENSMUSG000000030137 | intron_variant                                | -       |
| Bacteroides | 6  | 6_121221243 | 121221243 | 1 | A | G | 0.061 | 4.19E-01 | 8.28E-02 | 1.00E-05 | 1.00E+05 | 6.48E-06 | 4.19E-06 | 0.085577 | 1.33E-04 | ENSMUSG000000086527 | downstream_gene_variant                       | -       |
| Bacteroides | 5  | 5_90491714  | 90491714  | 0 | T | C | 0.11  | 0.11     | 0.01     | 3.34E-01 | 1.00E+05 | 2.78E-05 | 0.06     | 0.111233 | 1.57E-04 | ENSMUSG000000054932 | synonymous_variant                            | tcC/tcT |
| Bacteroides | 5  | 5_141952954 | 141952954 | 0 | T | C | 0.09  | 0.09     | 0.01     | 1.00E-05 | 1.00E+05 | 2.40E-05 | 0.06     | 0.154057 | 1.92E-04 | ENSMUSG000000039683 | intron_variant                                | -       |
| Bacteroides | 2  | 2_91674525  | 91674525  | 1 | T | G | 0.061 | 3.14E-01 | 7.47E-02 | 1.00E-05 | 1.00E+05 | 1.14E-04 | 0.06     | 0.159309 | 2.05E-04 | ENSMUSG000000027247 | downstream_gene_variant                       | -       |
| Bacteroides | 2  | 2_91674525  | 91674525  | 1 | T | G | 0.061 | 3.14E-01 | 7.47E-02 | 1.00E-05 | 1.00E+05 | 1.14E-04 | 0.06     | 0.159309 | 2.05E-04 | ENSMUSG000000027244 | downstream_gene_variant                       | -       |
| Bacteroides | 4  | 4_148006547 | 148006547 | 0 | T | C | 0.04  | 4.95E-01 | 9.98E-02 | 1.00E-05 | 1.00E+05 | 9.39E-06 | 0.05     | 0.159309 | 2.09E-04 | ENSMUSG000000029016 | downstream_gene_variant                       | -       |
| Bacteroides | 4  | 4_148006547 | 148006547 | 0 | T | C | 0.04  | 4.95E-01 | 9.98E-02 | 1.00E-05 | 1.00E+05 | 9.39E-06 | 0.05     | 0.159309 | 2.09E-04 | ENSMUSG000000029016 | 3_prime_UTR_variant                           | -       |
| Bacteroides | 4  | 4_148006547 | 148006547 | 0 | T | C | 0.04  | 4.95E-01 | 9.98E-02 | 1.00E-05 | 1.00E+05 | 9.39E-06 | 0.05     | 0.159309 | 2.09E-04 | ENSMUSG000000086806 | upstream_gene_variant                         | -       |
| Bacteroides | 4  | 4_148006547 | 148006547 | 0 | T | C | 0.04  | 4.95E-01 | 9.98E-02 | 1.00E-05 | 1.00E+05 | 9.39E-06 | 0.05     | 0.159309 | 2.09E-04 | ENSMUSG000000041616 | downstream_gene_variant                       | -       |
| Bacteroides | 3  | 3_86139069  | 86139069  | 1 | A | G | 0.041 | 4.65E-01 | 1.03E-01 | 1.00E-05 | 1.00E+05 | 4.06E-05 | 0.05     | 0.16785  | 2.86E-04 | ENSMUSG000000064984 | upstream_gene_variant                         | -       |
| Bacteroides | 3  | 3_86139069  | 86139069  | 1 | A | G | 0.041 | 4.65E-01 | 1.03E-01 | 1.00E-05 | 1.00E+05 | 4.06E-05 | 0.05     | 0.16785  | 2.86E-04 | ENSMUSG000000064390 | downstream_gene_variant                       | -       |
| Bacteroides | 3  | 3_86139069  | 86139069  | 1 | A | G | 0.041 | 4.65E-01 | 1.03E-01 | 1.00E-05 | 1.00E+05 | 4.06E-05 | 0.05     | 0.16785  | 2.86E-04 | ENSMUSG000000028081 | synonymous_variant                            | acT/acC |
| Bacteroides | 4  | 4_89688171  | 89688171  | 0 | T | C | 0.1   | 3.00E-01 | 6.77E-02 | 2.16E+00 | 1.00E+05 | 5.40E-05 | 0.05     | 0.16785  | 2.23E-04 | ENSMUSG000000043753 | intron_variant                                | -       |
| Bacteroides | 4  | 4_89688171  | 89688171  | 0 | T | C | 0.1   | 3.00E-01 | 6.77E-02 | 2.16E+00 | 1.00E+05 | 5.40E-05 | 0.05     | 0.16785  | 2.23E-04 | ENSMUSG000000043753 | upstream_gene_variant                         | -       |
| Bacteroides | 5  | 5_90519074  | 90519074  | 0 | C | A | 0.07  | 3.56E-01 | 8.10E-02 | 1.00E+05 | 1.00E+05 | 6.01E-05 | 0.05     | 0.16785  | 2.95E-04 | ENSMUSG000000029369 | missense_variant                              | gAc/gCc |
| Bacteroides | 5  | 5_90526381  | 90526381  | 1 | A | G | 0.041 | 3.53E-01 | 8.47E-02 | 1.00E-05 | 1.00E+05 | 1.25E-04 | 0.05     | 0.16785  | 2.79E-04 | ENSMUSG000000029369 | missense_variant                              | Gga/Aga |
| Bacteroides | 5  | 5_118265460 | 118265460 | 0 | G | A | 0.21  | 1.87E-01 | 4.49E-02 | 1.00E-05 | 1.00E+05 | 1.32E-04 | 0.05     | 0.16785  | 3.01E-04 | ENSMUSG000000032840 | 3_prime_UTR_variant                           | -       |
| Bacteroides | 5  | 5_118265460 | 118265460 | 0 | G | A | 0.21  | 1.87E-01 | 4.49E-02 | 1.00E-05 | 1.00E+05 | 1.32E-04 | 0.05     | 0.16785  | 3.01E-04 | ENSMUSG000000095477 | upstream_gene_variant                         | -       |
| Bacteroides | 6  | 6_41313290  | 41313290  | 2 | T | G | 0.042 | 3.65E-01 | 8.37E-02 | 1.00E-05 | 1.00E+05 | 6.65E-05 | 0.05     | 0.16785  | 3.14E-04 | ENSMUSG000000036938 | intron_variant                                | -       |
| Bacteroides | 6  | 6_41313298  | 41313298  | 2 | C | T | 0.042 | 3.65E-01 | 8.37E-02 | 1.00E-05 | 1.00E+05 | 6.65E-05 | 0.05     | 0.16785  | 3.14E-04 | ENSMUSG000000036938 | intron_variant                                | -       |
| Bacteroides | 6  | 6_41313339  | 41313339  | 2 | C | T | 0.042 | 3.65E-01 | 8.37E-02 | 1.00E-05 | 1.00E+05 | 6.65E-05 | 0.05     | 0.16785  | 3.14E-04 | ENSMUSG000000036938 | intron_variant                                | -       |
| Bacteroides | 6  | 6_128374511 | 128374511 | 0 | T | A | 0.1   | 2.93E-01 | 7.17E-02 | 1.00E-05 | 1.00E+05 | 1.65E-04 | 0.05     | 0.16785  | 2.83E-04 | ENSMUSG000000001517 | downstream_gene_variant                       | -       |
| Bacteroides | 6  | 6_128374511 | 128374511 | 0 | T | A | 0.1   | 2.93E-01 | 7.17E-02 | 1.00E-05 | 1.00E+05 | 1.65E-04 | 0.05     | 0.16785  | 2.83E-04 | ENSMUSG000000001517 | 3_prime_UTR_variant                           | -       |
| Bacteroides | 6  | 6_128374511 | 128374511 | 0 | T | A | 0.1   | 2.93E-01 | 7.17E-02 | 1.00E-05 | 1.00E+05 | 1.65E-04 | 0.05     | 0.16785  | 2.83E-04 | ENSMUSG000000079304 | upstream_gene_variant                         | -       |
| Bacteroides | 7  | 7_46072425  | 46072425  | 0 | T | C | 0.06  | 3.83E-01 | 8.62E-02 | 1.00E-05 | 1.00E+05 | 5.15E-05 | 0.05     | 0.16785  | 3.03E-04 | ENSMUSG000000030835 | intron_variant                                | -       |
| Bacteroides | 7  | 7_46081380  | 46081380  | 0 | T | C | 0.06  | 3.83E-01 | 8.62E-02 | 1.00E-05 | 1.00E+05 | 5.15E-05 | 0.05     | 0.16785  | 3.03E-04 | ENSMUSG000000030835 | intron_variant                                | -       |
| Bacteroides | 7  | 7_46081380  | 46081380  | 0 | T | C | 0.06  | 3.83E-01 | 8.62E-02 | 1.00E-05 | 1.00E+05 | 5.15E-05 | 0.05     | 0.16785  | 3.03E-04 | ENSMUSG000000030835 | upstream_gene_variant                         | -       |
| Bacteroides | 8  | 8_111715660 | 111715660 | 0 | G | A | 0.23  | 2.37E-01 | 5.37E-02 | 4.58E+00 | 1.00E+05 | 5.84E-05 | 1.85E-05 | 0.16785  | 2.82E-04 | ENSMUSG000000031955 | synonymous_variant                            | gaT/gaC |
| Bacteroides | 12 | 12_75308870 | 75308870  | 1 | G | A | 0.316 | 2.10E-01 | 5.03E-02 | 9.07E-01 | 1.00E+05 | 1.23E-04 | 0.05     | 0.16785  | 2.86E-04 | ENSMUSG000000046768 | non_coding_exon_variant,nc_transcript_variant | -       |
| Bacteroides | 12 | 12_75308870 | 75308870  | 1 | G | A | 0.316 | 2.10E-01 | 5.03E-02 | 9.07E-01 | 1.00E+05 | 1.23E-04 | 0.05     | 0.16785  | 2.86E-04 | ENSMUSG000000046768 | missense_variant                              | cAt/cGt |
| Bacteroides | 12 | 12_75308870 | 75308870  | 1 | G | A | 0.316 | 2.10E-01 | 5.03E-02 | 9.07E-01 | 1.00E+05 | 1.23E-04 | 0.05     | 0.16785  | 2.86E-04 | ENSMUSG000000046768 | upstream_gene_variant                         | -       |
| Bacteroides | 12 | 12_75308874 | 75308874  | 1 | C | G | 0.327 | 2.07E-01 | 4.71E-02 | 6.25E-01 | 1.00E+05 | 6.15E-05 | 1.53E-05 | 0.16785  | 2.56E-04 | ENSMUSG000000046768 | non_coding_exon_variant,nc_transcript_variant | -       |
| Bacteroides | 12 | 12_75308874 | 75308874  | 1 | C | G | 0.327 | 2.07E-01 | 4.71E-02 | 6.25E-01 | 1.00E+05 | 6.15E-05 | 1.53E-05 | 0.16785  | 2.56E-04 | ENSMUSG000000046768 | missense_variant                              | gaG/gaC |
| Bacteroides | 12 | 12_75308874 | 75308874  | 1 | C | G | 0.327 | 2.07E-01 | 4.71E-02 | 6.25E-01 | 1.00E+05 | 6.15E-05 | 1.53E-05 | 0.16785  | 2.56E-04 | ENSMUSG000000046768 | upstream_gene_variant                         | -       |
| Bacteroides | 13 | 13_55403064 | 55403064  | 0 | A | G | 0.08  | 2.90E-01 | 6.79E-02 | 1.00E-05 | 1.00E+05 | 9.19E-05 | 0.05     | 0.16785  | 2.49E-04 | ENSMUSG000000021490 | synonymous_variant                            | aaA/aaG |
| Bacteroides | 14 | 14_32598040 | 32598040  | 0 | C | T | 0.04  | 4.44E-01 | 1.05E-01 | 1.00E-05 | 1.00E+05 | 1.03E-04 | 0.05     | 0.16785  | 2.60E-04 | ENSMUSG000000041730 | upstream_gene_variant                         | -       |
| Bacteroides | 14 | 14_70604927 | 70604927  | 1 | A | G | 0.184 | 1.99E-01 | 4.86E-02 | 1.00E-05 | 1.00E+05 | 1.64E-04 | 0.05     | 0.16785  | 2.50E-04 | ENSMUSG000000022099 | intron_variant                                | -       |
| Bacteroides | 4  | 4_129472127 | 129472127 | 2 | T | C | 0.052 | 3.98E-01 | 9.53E-02 | 1.00E-05 | 1.00E+05 | 1.26E-04 | 0.05     | 0.17212  | 3.60E-04 | ENSMUSG000000040859 | intron_variant                                | -       |
| Bacteroides | 4  | 4_129472127 | 129472127 | 2 | T | C | 0.052 | 3.98E-01 | 9.53E-02 | 1.00E-05 | 1.00E+05 | 1.26E-04 | 0.05     | 0.17212  | 3.60E-04 | ENSMUSG000000040859 | downstream_gene_variant                       | -       |
| Bacteroides | 5  | 5_139771573 | 139771573 | 1 | G | A | 0.041 | 4.39E-01 | 1.05E-01 | 1.00E-05 | 1.00E+05 | 1.26E-04 | 0.05     | 0.17212  | 3.53E-04 | ENSMUSG000000029547 | synonymous_variant                            | gcT/gcC |

|                         |    |              |           |   |   |   |       |          |          |          |          |          |          |          |          |                    |                                               |         |
|-------------------------|----|--------------|-----------|---|---|---|-------|----------|----------|----------|----------|----------|----------|----------|----------|--------------------|-----------------------------------------------|---------|
| Bacteroides             | 5  | 5_139771573  | 139771573 | 1 | G | A | 0.041 | 4.39E-01 | 1.05E-01 | 1.00E-05 | 1.00E+05 | 1.26E-04 | 2.81E-05 | 0.17212  | 3.53E-04 | ENSMUSG00000098574 | upstream_gene_variant                         | -       |
| Bacteroides             | 6  | 6_41216082   | 41216082  | 1 | T | C | 0.041 | 3.61E-01 | 8.40E-02 | 1.00E-05 | 1.00E+05 | 8.38E-05 | 3.09E-05 | 0.17212  | 3.72E-04 | ENSMUSG00000076478 | missense_variant                              | Cgg/Tgg |
| Bacteroides             | 6  | 6_41216085   | 41216085  | 1 | T | C | 0.041 | 3.61E-01 | 8.40E-02 | 1.00E-05 | 1.00E+05 | 8.38E-05 | 3.09E-05 | 0.17212  | 3.72E-04 | ENSMUSG00000076478 | missense_variant                              | Ctc/Ttc |
| Bacteroides             | 6  | 6_41303204   | 41303204  | 1 | G | A | 0.041 | 3.61E-01 | 8.40E-02 | 1.00E-05 | 1.00E+05 | 8.38E-05 | 3.09E-05 | 0.17212  | 3.72E-04 | ENSMUSG00000054106 | intron_variant                                | -       |
| Bacteroides             | 6  | 6_41312455   | 41312455  | 1 | G | A | 0.041 | 3.61E-01 | 8.40E-02 | 1.00E-05 | 1.00E+05 | 8.38E-05 | 3.09E-05 | 0.17212  | 3.72E-04 | ENSMUSG00000036938 | intron_variant                                | -       |
| Bacteroides             | 6  | 6_41312456   | 41312456  | 1 | T | C | 0.041 | 3.61E-01 | 8.40E-02 | 1.00E-05 | 1.00E+05 | 8.38E-05 | 3.09E-05 | 0.17212  | 3.72E-04 | ENSMUSG00000036938 | intron_variant                                | -       |
| Bacteroides             | 6  | 6_41312497   | 41312497  | 1 | T | A | 0.041 | 3.81E-01 | 9.24E-02 | 1.00E-05 | 1.00E+05 | 8.38E-05 | 3.09E-05 | 0.17212  | 3.72E-04 | ENSMUSG00000036938 | intron_variant                                | -       |
| Bacteroides             | 6  | 6_53816073   | 53816073  | 1 | A | T | 0.061 | 3.81E-01 | 9.24E-02 | 6.72E-01 | 1.00E+05 | 1.46E-04 | 0.5      | 0.17212  | 3.67E-04 | ENSMUSG00000078169 | upstream_gene_variant                         | -       |
| Bacteroides             | 6  | 6_53816073   | 53816073  | 1 | A | T | 0.061 | 3.24E-01 | 7.63E-02 | 6.72E-01 | 1.00E+05 | 1.46E-04 | 0.5      | 0.17212  | 3.67E-04 | ENSMUSG00000043496 | 3_prime_UTR_variant                           | -       |
| Bacteroides             | 12 | 12_104780917 | 104780917 | 0 | T | C | 0.08  | 3.52E-01 | 8.90E-02 | 3.90E+00 | 1.00E+05 | 9.81E-05 | 0.5      | 0.17212  | 3.70E-04 | ENSMUSG00000021097 | synonymous_variant                            | gaG/gaA |
| Bacteroides             | 19 | 19_4712684   | 4712684   | 0 | A | G | 0.06  | 4.32E-01 | 1.06E-01 | 1.00E-05 | 1.00E+05 | 2.54E-04 | 0.5      | 0.17212  | 3.61E-04 | ENSMUSG00000067889 | intron_variant                                | -       |
| Bacteroides             | 1  | 1_171237117  | 171237117 | 2 | T | C | 0.042 | 4.32E-01 | 1.06E-01 | 1.00E-05 | 1.00E+05 | 1.70E-04 | 0.5      | 0.198746 | 4.22E-04 | ENSMUSG00000058715 | upstream_gene_variant                         | -       |
| Bacteroides             | 1  | 1_171237117  | 171237117 | 2 | T | C | 0.042 | 4.32E-01 | 1.06E-01 | 1.00E-05 | 1.00E+05 | 1.70E-04 | 0.5      | 0.198746 | 4.22E-04 | ENSMUSG00000013593 | intron_variant                                | -       |
| Bacteroides             | 1  | 1_171237117  | 171237117 | 2 | T | C | 0.042 | 4.32E-01 | 1.06E-01 | 1.00E-05 | 1.00E+05 | 1.70E-04 | 0.5      | 0.198746 | 4.22E-04 | ENSMUSG00000013593 | downstream_gene_variant                       | -       |
| Bacteroides             | 1  | 1_171237117  | 171237117 | 2 | T | C | 0.042 | 4.01E-01 | 9.48E-02 | 1.00E-05 | 1.00E+05 | 1.70E-04 | 0.5      | 0.198746 | 4.22E-04 | ENSMUSG00000013593 | upstream_gene_variant                         | -       |
| Bacteroides             | 6  | 6_116692848  | 116692848 | 1 | C | G | 0.051 | 4.01E-01 | 9.48E-02 | 1.00E-05 | 1.00E+05 | 1.05E-04 | 0.5      | 0.198746 | 4.24E-04 | ENSMUSG00000048108 | 3_prime_UTR_variant                           | -       |
| Bacteroides             | 6  | 6_116692848  | 116692848 | 1 | C | G | 0.051 | 2.30E-01 | 5.78E-02 | 1.00E-05 | 1.00E+05 | 1.05E-04 | 0.5      | 0.198746 | 4.24E-04 | ENSMUSG00000048108 | downstream_gene_variant                       | -       |
| Bacteroides             | 7  | 7_127375830  | 127375830 | 0 | A | G | 0.24  | 1.58E-01 | 3.97E-02 | 1.00E-05 | 1.00E+05 | 2.30E-04 | 0.5      | 0.198746 | 4.32E-04 | ENSMUSG00000054381 | 5_prime_UTR_variant                           | -       |
| Bacteroides             | 9  | 9_72856998   | 72856998  | 0 | A | G | 0.35  | 2.50E-01 | 6.27E-02 | 1.00E-05 | 1.00E+05 | 2.33E-04 | 0.5      | 0.198746 | 4.34E-04 | ENSMUSG00000036030 | synonymous_variant                            | cgG/cgA |
| Bacteroides             | 2  | 2_71209672   | 71209672  | 0 | T | C | 0.11  | 4.74E-01 | 1.22E-01 | 1.00E-05 | 1.00E+05 | 2.24E-04 | 0.5      | 0.198746 | 4.44E-04 | ENSMUSG00000027012 | upstream_gene_variant                         | -       |
| Bacteroides             | 6  | 6_48445226   | 48445226  | 0 | A | C | 0.03  | 4.74E-01 | 1.22E-01 | 1.00E-05 | 1.00E+05 | 3.27E-04 | 0.5      | 0.198746 | 4.51E-04 | ENSMUSG00000068551 | intron_variant                                | -       |
| Bacteroides             | 6  | 6_48445226   | 48445226  | 0 | A | C | 0.03  | 4.74E-01 | 1.22E-01 | 1.00E-05 | 1.00E+05 | 3.27E-04 | 0.5      | 0.198746 | 4.51E-04 | ENSMUSG00000029797 | upstream_gene_variant                         | -       |
| Bacteroides             | 6  | 6_48445226   | 48445226  | 0 | A | C | 0.03  | 4.74E-01 | 1.22E-01 | 1.00E-05 | 1.00E+05 | 3.27E-04 | 0.5      | 0.198746 | 4.51E-04 | ENSMUSG00000068551 | upstream_gene_variant                         | -       |
| Bacteroides             | 2  | 2_13010347   | 13010347  | 0 | G | T | 0.38  | 1.80E-01 | 4.41E-02 | 1.00E-05 | 1.00E+05 | 1.66E-04 | 0.5      | 0.198746 | 4.51E-04 | ENSMUSG00000049630 | synonymous_variant                            | atA/atC |
| Bacteroides             | 13 | 13_69612885  | 69612885  | 2 | T | C | 0.042 | 4.35E-01 | 1.06E-01 | 1.00E-05 | 1.00E+05 | 1.54E-04 | 0.5      | 0.198746 | 4.52E-04 | ENSMUSG00000021594 | upstream_gene_variant                         | -       |
| Bacteroides             | 13 | 13_69612885  | 69612885  | 2 | T | C | 0.042 | 4.35E-01 | 1.06E-01 | 1.00E-05 | 1.00E+05 | 1.54E-04 | 0.5      | 0.198746 | 4.52E-04 | ENSMUSG00000091133 | non_coding_exon_variant,nc_transcript_variant | -       |
| Bacteroides             | 13 | 13_69612885  | 69612885  | 2 | T | C | 0.042 | 4.35E-01 | 1.06E-01 | 1.00E-05 | 1.00E+05 | 1.54E-04 | 0.5      | 0.198746 | 4.52E-04 | ENSMUSG00000021595 | intron_variant                                | -       |
| Bacteroides             | 10 | 10_40349413  | 40349413  | 1 | C | A | 0.082 | 3.36E-01 | 7.70E-02 | 1.00E-05 | 1.00E+05 | 6.65E-05 | 0.5      | 0.198746 | 4.55E-04 | ENSMUSG00000038491 | non_coding_exon_variant,nc_transcript_variant | -       |
| Bacteroides             | 10 | 10_40349413  | 40349413  | 1 | C | A | 0.082 | 3.36E-01 | 7.70E-02 | 1.00E-05 | 1.00E+05 | 6.65E-05 | 0.5      | 0.198746 | 4.55E-04 | ENSMUSG00000038481 | 5_prime_UTR_variant                           | -       |
| Bacteroides             | 10 | 10_40349416  | 40349416  | 1 | A | C | 0.082 | 3.36E-01 | 7.70E-02 | 1.00E-05 | 1.00E+05 | 6.65E-05 | 0.5      | 0.198746 | 4.55E-04 | ENSMUSG00000038491 | non_coding_exon_variant,nc_transcript_variant | -       |
| Bacteroides             | 10 | 10_40349416  | 40349416  | 1 | A | C | 0.082 | 3.65E-01 | 8.75E-02 | 1.00E-05 | 1.00E+05 | 6.65E-05 | 0.5      | 0.198746 | 4.55E-04 | ENSMUSG00000038481 | 5_prime_UTR_variant                           | -       |
| Bacteroides             | 14 | 14_79182968  | 79182968  | 0 | T | C | 0.07  | 5.07E-01 | 9.67E-02 | 9.11E-01 | 1.00E+05 | 1.28E-04 | 0.5      | 0.198746 | 4.55E-04 | ENSMUSG00000058997 | intron_variant                                | -       |
| Desulfovibrionaceae_unc | 6  | 6_41617399   | 41617399  | 0 | G | A | 0.17  | 5.07E-01 | 9.67E-02 | 6.60E-01 | 1.00E+05 | 3.50E-06 | 0.07     | 0.137653 | 6.20E-05 | ENSMUSG00000029868 | downstream_gene_variant                       | -       |
| Desulfovibrionaceae_unc | 6  | 6_41617399   | 41617399  | 0 | G | A | 0.17  | 5.07E-01 | 9.67E-02 | 6.60E-01 | 1.00E+05 | 3.50E-06 | 0.07     | 0.137653 | 6.20E-05 | ENSMUSG00000029869 | downstream_gene_variant                       | -       |
| Desulfovibrionaceae_unc | 6  | 6_41617399   | 41617399  | 0 | G | A | 0.17  | 5.07E-01 | 9.67E-02 | 6.60E-01 | 1.00E+05 | 3.50E-06 | 0.07     | 0.137653 | 6.20E-05 | ENSMUSG00000029869 | intron_variant                                | -       |
| Desulfovibrionaceae_unc | 6  | 6_41617399   | 41617399  | 0 | G | A | 0.17  | 5.07E-01 | 9.67E-02 | 6.60E-01 | 1.00E+05 | 3.50E-06 | 0.07     | 0.137653 | 6.20E-05 | ENSMUSG00000029869 | upstream_gene_variant                         | -       |
| Desulfovibrionaceae_unc | 4  | 4_116557950  | 116557950 | 0 | A | G | 0.1   | 6.96E-01 | 1.31E-01 | 1.00E+05 | 1.00E+05 | 2.88E-06 | 1.59E-06 | 0.137653 | 8.42E-05 | ENSMUSG00000034042 | upstream_gene_variant                         | -       |
| Desulfovibrionaceae_unc | 4  | 4_116557950  | 116557950 | 0 | A | G | 0.1   | 6.96E-01 | 1.31E-01 | 1.00E+05 | 1.00E+05 | 2.88E-06 | 1.59E-06 | 0.137653 | 8.42E-05 | ENSMUSG00000055900 | upstream_gene_variant                         | -       |
| Desulfovibrionaceae_unc | 4  | 4_116557950  | 116557950 | 0 | A | G | 0.1   | 6.96E-01 | 1.31E-01 | 1.00E+05 | 1.00E+05 | 2.88E-06 | 1.59E-06 | 0.137653 | 8.42E-05 | ENSMUSG00000034042 | intron_variant                                | -       |
| Desulfovibrionaceae_unc | 4  | 4_88807526   | 88807526  | 1 | T | C | 0.439 | 4.48E-01 | 8.51E-02 | 8.68E+01 | 1.00E+05 | 3.20E-06 | 0.06     | 0.137653 | 8.66E-05 | ENSMUSG00000094648 | downstream_gene_variant                       | -       |
| Desulfovibrionaceae_unc | 4  | 4_88807526   | 88807526  | 1 | T | C | 0.439 | 4.48E-01 | 8.51E-02 | 8.68E+01 | 1.00E+05 | 3.20E-06 | 0.06     | 0.137653 | 8.66E-05 | ENSMUSG00000070908 | 3_prime_UTR_variant                           | -       |
| Desulfovibrionaceae_unc | 4  | 4_88807202   | 88807202  | 1 | G | T | 0.449 | 4.57E-01 | 9.02E-02 | 1.51E+02 | 1.00E+05 | 6.45E-06 | 0.06     | 0.192063 | 1.24E-04 | ENSMUSG00000094648 | downstream_gene_variant                       | -       |
| Desulfovibrionaceae_unc | 4  | 4_88807202   | 88807202  | 1 | G | T | 0.449 | 4.57E-01 | 9.02E-02 | 1.51E+02 | 1.00E+05 | 6.45E-06 | 0.06     | 0.192063 | 1.24E-04 | ENSMUSG00000070908 | 3_prime_UTR_variant                           | -       |

|                         |    |             |          |   |   |   |       |          |          |          |          |          |          |          |          |                    |                       |         |
|-------------------------|----|-------------|----------|---|---|---|-------|----------|----------|----------|----------|----------|----------|----------|----------|--------------------|-----------------------|---------|
| Desulfovibrionaceae_unc | 16 | 16_17209775 | 17209775 | 0 | G | C | 0.47  | -        | -        | 1.04E+00 | 1.00E+05 | 1.46E-05 | 3.93E-06 | 0.192063 | 1.29E-04 | ENSMUSG00000096434 | upstream_gene_variant | -       |
| Desulfovibrionaceae_unc | 16 | 16_17209775 | 17209775 | 0 | G | C | 0.47  | 3.68E-01 | 7.64E-02 | 1.04E+00 | 1.00E+05 | 1.46E-05 | 3.93E-06 | 0.192063 | 1.29E-04 | ENSMUSG00000071636 | missense_variant      | caG/caC |
| Odoribacter             | 3  | 3_68695548  | 68695548 | 0 | A | G | 0.42  | 4.38E-01 | 6.76E-02 | 1.00E-05 | 1.00E+05 | 4.71E-08 | 7.79E-09 | 0.001924 | 1.02E-05 | ENSMUSG00000027776 | missense_variant      | Ggc/Agc |
| Odoribacter             | 3  | 3_68695502  | 68695502 | 0 | T | C | 0.43  | 3.85E-01 | 7.15E-02 | 1.00E-05 | 1.00E+05 | 2.20E-06 | 4.13E-07 | 0.033164 | 4.64E-05 | ENSMUSG00000027776 | synonymous_variant    | aaC/aaT |
| Odoribacter             | 3  | 3_68695379  | 68695379 | 0 | A | G | 0.43  | 3.78E-01 | 6.85E-02 | 1.00E-05 | 1.00E+05 | 1.35E-06 | 5.37E-07 | 0.033164 | 5.19E-05 | ENSMUSG00000027776 | intron_variant        | -       |
| Odoribacter             | 3  | 3_68695382  | 68695382 | 0 | T | C | 0.43  | 3.78E-01 | 6.85E-02 | 1.00E-05 | 1.00E+05 | 1.35E-06 | 5.37E-07 | 0.033164 | 5.19E-05 | ENSMUSG00000027776 | intron_variant        | -       |
| Odoribacter             | 3  | 3_68695209  | 68695209 | 1 | G | C | 0.214 | 5.18E-01 | 9.89E-02 | 1.00E-05 | 1.00E+05 | 3.51E-06 | 8.41E-07 | 0.041551 | 6.32E-05 | ENSMUSG00000027776 | missense_variant      | aCt/aGt |
| Odoribacter             | 3  | 3_68695333  | 68695333 | 0 | T | C | 0.42  | 3.67E-01 | 6.87E-02 | 1.00E-05 | 1.00E+05 | 2.51E-06 | 1.10E-06 | 0.045289 | 7.11E-05 | ENSMUSG00000027776 | missense_variant      | aCg/aTg |

**Table S12.** Loci associated with microbial measurements in mouse and human mGWAS.

| Chr | Bp        | Annotated gene | Associated microbial measurements | P-values <sup>1</sup> | Q-values <sup>2</sup> | Effect size (%) <sup>3</sup> | Missense? | Tissue expressed <sup>4</sup> |       |       |       |
|-----|-----------|----------------|-----------------------------------|-----------------------|-----------------------|------------------------------|-----------|-------------------------------|-------|-------|-------|
|     |           |                |                                   |                       |                       |                              |           | Brain                         |       | Gut   |       |
|     |           |                |                                   |                       |                       |                              |           | mouse                         | human | mouse | human |
| 2   | 21367906  | <i>Gpr158</i>  | <i>Clostridiales_unc</i>          | 9.03E-06              | 0.158                 | 27.2                         | -         | yes                           | yes   | yes   | -     |
| 6   | 48445226  | <i>Sspo</i>    | <i>Bacteroides</i>                | 4.38E-05              | 0.199                 | 23.8                         | -         | yes                           | NA    | -     | NA    |
| 6   | 113817441 | <i>Atp2b2</i>  | Phylogenetic diversity            | 1.31E-05              | 0.162                 | 21.1                         | -         | yes                           | yes   | yes   | -     |
| 6   | 144993723 | <i>Bcat1</i>   | <i>Clostridiales_unc</i>          | 1.12E-05              | 0.162                 | 26.1                         | -         | yes                           | yes   | yes   | yes   |
| 8   | 16358320  | <i>Csmd1</i>   | Phylogenetic diversity            | 1.09E-06              | 0.055                 | 17.0                         | -         | yes                           | yes   | -     | -     |
| 8   | 16358359  |                |                                   | 3.89E-06              | 0.122                 | 13.8                         | -         | yes                           | yes   | -     | -     |
| 12  | 75308870  | <i>Rhoj</i>    | <i>Bacteroides</i>                | 1.90E-05              | 0.168                 | 28.7                         | yes       | yes                           | yes   | -     | yes   |
| 12  | 75308874  |                |                                   | 1.53E-05              | 0.168                 | 24.2                         | yes       | yes                           | yes   | -     | yes   |
| 12  | 75394205  | <i>Rhoj</i>    | Phylogenetic diversity            | 5.70E-06              | 0.159                 | 5.6                          | -         | yes                           | yes   | -     | yes   |
| 12  | 104780917 | <i>Clmn</i>    | <i>Bacteroides</i>                | 3.07E-05              | 0.172                 | 28.5                         | -         | yes                           | yes   | yes   | yes   |
| 13  | 69612885  | <i>Nsun2</i>   | <i>Bacteroides</i>                | 4.40E-05              | 0.199                 | 27.5                         | -         | yes                           | yes   | -     | yes   |

<sup>1</sup> Likelihood ratio test p-values.

<sup>2</sup> SNPs with q-value < 0.2 were used to compare with human mGWAS gene set.

<sup>3</sup> ANOVA R<sup>2</sup> values. Residuals after covariate regression (i.e. Genetic PC1-4 and Latitude) on box-cox transformed relative abundances of bacterial taxa were used.

<sup>4</sup> Tissue expression data came from the Human Protein Atlas Database for humans and MGI Gene Expression Database for mice. All expression detected in brain tissue and gut (i.e. small and large intestines) as evidence of gene expression. “-” indicates no evidence of expression. “NA” indicates expression not tested.
